# Supplementary material for: Enantioselective cyanosilylation of aldehydes catalyzed by a multistereogenic salen–Mn(iii) complex with a rotatable benzylic group as a helping hand
Source: Royal Society of Chemistry journal article supplement (doi:10.1039/c4ra12884b), 2014-12-03
Supplement: c4ra12884b1.pdf [file c4ra12884b1.pdf]

## Supporting Information

# Enantioselective Cyanosilylation of Aldehydes Catalyzed by Multistereogenic Salen-Mn(III) Complex With Rotatable Benzylic Group As a Helping Hand

Yun-Long Wei<sup>a</sup>, Wei-Sheng Huang<sup>a</sup>, Yu-Ming Cui<sup>a</sup>, Ke-Fang Yang<sup>\*a</sup>, Zheng Xu<sup>a</sup>, Li-Wen Xu<sup>\*a,b</sup>

<sup>a</sup> Key Laboratory of Organosilicon Chemistry and Material Technology of Ministry of Education (MOE), Hangzhou Normal University, Hangzhou 311121; Tel: +86-571-28867756; E-mail: liwenxu@hznu.edu.cn

<sup>b</sup> State Key Laboratory for Oxo Synthesis and Selective Oxidation, Lanzhou Institute of Chemical Physics, Chinese Academy of Sciences, Lanzhou, P. R. China; E-mail: licpxulw@yahoo.com

## Table of Contents

|                                                                       |           |
|-----------------------------------------------------------------------|-----------|
| <b>S-1. General Information.....</b>                                  | <b>2</b>  |
| <b>S-2. The Synthesis of Salen Ligands.....</b>                       | <b>2</b>  |
| <b>S-3. The synthesis of (Salen)Mn(III)-X catalysts.....</b>          | <b>15</b> |
| <b>S-4. General procedure for the asymmetric cyanosilylation.....</b> | <b>17</b> |
| <b>Table S1. Screening of solvents.....</b>                           | <b>25</b> |
| <b>Table S2. The effect of temperature.....</b>                       | <b>27</b> |
| <b>Table S3. The effect of phosphine oxide.....</b>                   | <b>28</b> |
| <b>S-5. NMR Charts of Salen ligands and products.....</b>             | <b>30</b> |
| <b>S-6. HPLC Spectra of the products 3.....</b>                       | <b>59</b> |

## S-1. General information

All reagents and solvents were used directly without purification. Flash column chromatography was performed over silica (200-300 mesh). Reactions were monitored by thin layer chromatography using silica gel.  $^1\text{H-NMR}$ ,  $^{13}\text{C-NMR}$ ,  $^{19}\text{F-NMR}$  were respectively recorded at 400 or 500 MHz, 101 or 126 MHz and 376 or 471 MHz respectively,  $^1\text{H}$  NMR chemical shifts are reported in ppm relative to tetramethylsilane (TMS) with the solvent resonance employed as the internal standard ( $\text{CDCl}_3$  at 7.26 ppm,  $(\text{CD}_3)_2\text{CO}$  at 2.05 ppm).  $^{13}\text{C}$  NMR chemical shifts are reported in ppm from tetramethyl silane (TMS) with the solvent resonance as the internal standard ( $\text{CDCl}_3$  at 77.20 ppm). Thin layer chromatography was performed using silica gel;  $\text{F}_{254}$  TLC plates and visualized with ultraviolet light. HPLC was carried out with a Waters 2695 Millennium system equipped with a photodiode array detector. The ESI-MS analysis of the samples was operated on an LCQ advantage mass spectrometer (ThermoFisher Company, USA), equipped with an ESI ion source in the positive ionization mode, with data acquisition using the Xcalibur software.

## S-2. The Synthesis of Salen Ligands

### 2.1. Schematic synthesis of Salen 1-3

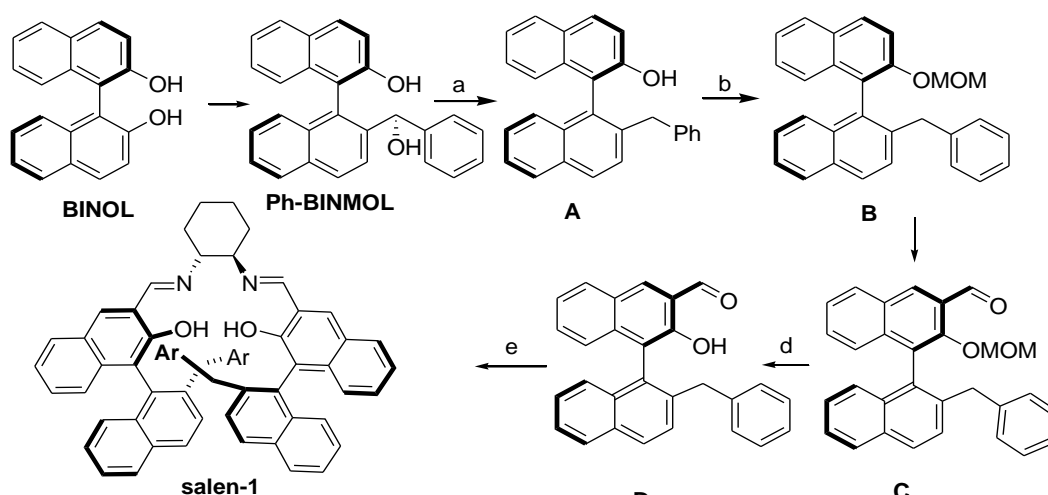

salen-1a: Ar = Ph  
salen-1b: Ar = *p*(*t*-Bu)Ph  
salen-1c: Ar = *o*-MePh  
salen-1d: Ar = 1-naphthyl

## 1.2 The synthesis of BINOL-derived product salen-1a from Ph-BINMOL:

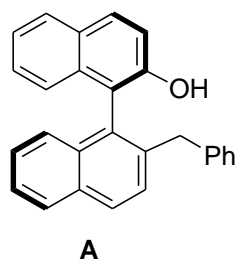

**Step a:** To a solution of (*S, R*)-Ar-BINMOL (9.4g, >99% *ee*, 25 mmol) and NaI (22.5 g, 150 mmol) in dry acetonitrile (100 mL) were added TMSCl (13 mL, 150 mmol) at room temperature under Argon atmosphere. After the addition, the solution was allowed to stir at room temperature overnight. Then saturated sodium thiosulfate solution was added until the mixture turned colorless. The resultant mixture was extracted with DCM, and washed with water and saturated NaCl solution. The organic layer was dried over Na<sub>2</sub>SO<sub>4</sub>, concentrated, and the residue was purified by column chromatography (hexanes/ethyl acetate = 5/1) to give the desired product A (9 g, 100% yield) as a white solid. <sup>1</sup>H NMR (CDCl<sub>3</sub>, 400 MHz) δ 7.91 (m, 3H), 7.52 (d, *J* = 8.4 Hz, 1H), 7.45 (t, *J* = 6.8 Hz, 1H), 7.52-7.25 (m, 8H), 7.12 (d, *J* = 7.2 Hz, 2H), 6.99 (d, *J* = 8.0 Hz, 1H), 6.90 (d, *J* = 6.0 Hz, 1H), 4.62 (s, 1H), 3.77 (s, 2H). <sup>13</sup>C NMR (CDCl<sub>3</sub>, 100 MHz) δ 151.2, 140.5, 140.3, 133.7, 133.2, 132.8, 130.1, 129.3, 129.1, 129.1, 128.4, 128.3, 128.2, 127.0, 126.8, 126.1, 126.0, 125.8, 124.7, 124.7, 123.5, 117.5, 117.3, 77.4, 77.1, 76.8, 39.8 ppm. IR (neat, cm<sup>-1</sup>): 3488, 3439, 3052, 3020, 2957, 2925, 1924, 1810, 1685, 1617, 1596, 1517, 1505, 1493, 1468, 1450, 1438, 1401, 1379, 1361, 1332, 1301, 1271, 1260, 1236, 1220, 1202, 1173, 1142, 1126, 1074, 1026, 975, 968, 948, 935, 910, 875, 868, 837, 816, 790, 769, 755, 717, 698, 684 cm<sup>-1</sup>. Exact mass calcd for C<sub>27</sub>H<sub>20</sub>O [M+H]<sup>+</sup>, 361.15, Found 361.15.

## 1.3 The synthesis of MOM-protected product (Step b):

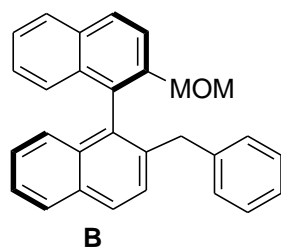

To a solution of NaH (0.96 g, 40 mmol) in dry THF (150 mL) were added compound A (7.2 g, 20 mmol) which was dissolved in dry THF at 0 °C temperature under Argon

atmosphere. The mixture was stirred for 1h, then MOMCl (3.06 mL, 40 mmol) was added at 0 °C. The mixture was allowed to stir at room temperature for 4h. After quenching with water, the resultant mixture was extracted with ethyl acetate, and washed with water and saturated NaCl solution. The organic layer was dried over MgSO<sub>4</sub>, concentrated, and the residue was purified by column chromatography (hexanes/ethyl acetate = 10/1) to give the desired product **B** (7.28 g, 90% yield) as a pale yellow solid. <sup>1</sup>H NMR (CDCl<sub>3</sub>, 400 MHz) δ 7.93 (m, 4H), 7.59 (d, *J* = 9.2 Hz, H), 7.47-7.34 (m, 3H), 7.22 (s, 3H), 7.12-7.06 (m, 4H), 6.94 (s, 2H), 4.91 (m, 2H), 3.78 (s, 2H), 3.15 (s, 3H). <sup>13</sup>C NMR (CDCl<sub>3</sub>, 100 MHz) δ 152.6, 141.1, 138.0, 134.0, 133.3, 132.7, 132.3, 129.7, 129.6, 129.2, 128.1, 128.0, 127.9, 127.9, 127.8, 126.5, 126.3, 126.0, 125.7, 125.4, 125.3, 124.1, 116.4, 94.6, 77.4, 77.1, 76.8, 55.8, 39.9 ppm. IR (neat, cm<sup>-1</sup>): 3419, 3060, 3025, 2951, 2920, 2900, 2848, 2839, 1910, 1754, 1621, 1592, 1504, 1492, 1471, 1450, 1435, 1401, 1355, 1335, 1300, 1269, 1246, 1200, 1166, 1148, 1088, 1069, 1032, 1013, 946, 923, 897, 861, 843, 829, 812, 794, 784, 762, 747, 740, 718, 696, 683 cm<sup>-1</sup>. Exact mass calcd for C<sub>29</sub>H<sub>24</sub>O<sub>2</sub> [M+Na]<sup>+</sup>, 427.17, Found 427.17.

#### 1.4 The synthesis of BINMOL-derived aldehyde (Step c):

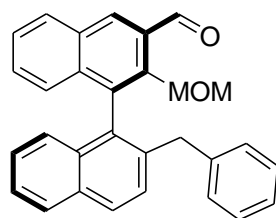

**C**

To a solution of compound **B** (4.04 g, 10 mmol) in the dry THF (100 ml) were added TMEDA (1.8 ml, 12 mmol) in dry THF at -78 °C under Argon atmosphere. Then *n*-BuLi (9 ml, 14 mmol, 1.5 M in hexane) was added slowly in 1h. After the addition, the solution was allowed to stir at 0 °C for 30 min. The solution was cooled to -78 °C. A solution of dry DMF (10 ml, 13 mmol) in dry THF (10 ml) were added. The solution was stirred for 30 min at -78 °C, then warmed to 0 °C. At 0 °C, it was stirred for 1.5 h. After quenching with saturated NH<sub>4</sub>Cl solution, 1 M HCl aqueous solution was added. The resultant mixture was extracted with ethyl acetate, and washed with

saturated NaHCO<sub>3</sub>, water and saturated NaCl solution. The organic layer was dried over Na<sub>2</sub>SO<sub>4</sub>, concentrated, and the residue was purified by column chromatography (hexanes/ethyl acetate = 20/1) to give the desired product **C** (3.24 g, 75% yield) as a pale yellow power. <sup>1</sup>H NMR (CDCl<sub>3</sub>, 400 MHz) δ 10.60 (s, H), 8.60 (s, H), 8.04 (d, *J*=8.0 Hz, H), 7.92 (t, *J*=8.0 Hz, 3H), 7.49-7.43 (m, 3H), 7.27 (s, 3H), 7.19 (d, *J*=8.4, H), 7.08-7.03 (m, 4H), 6.89 (d, *J*=7.6 Hz, 2H), 4.62 (m, 2H), 3.86 (m, 2H), 2.93 (s, 3H). <sup>13</sup>C NMR (CDCl<sub>3</sub>, 100 MHz) δ 191.1, 153.1, 140.2, 138.9, 136.9, 133.3, 132.2, 131.9, 131.0, 130.1, 130.1, 129.2, 129.2, 129.1, 128.9, 128.6, 128.1, 128.1, 126.6, 126.2, 126.2, 126.1, 125.9, 125.5, 99.9, 77.4, 77.1, 76.8, 57.0, 40.0 ppm. IR (neat, cm<sup>-1</sup>): 3057, 2920, 1689, 1618, 1586, 1506, 1496, 1451, 1382, 1354, 1330, 1259, 1182, 1156, 1104, 1073, 1042, 963, 925, 879, 832, 807, 787, 754, 712, 698, 665 cm<sup>-1</sup>. Exact mass calcd for C<sub>30</sub>H<sub>24</sub>O<sub>3</sub> [M+Na]<sup>+</sup>, 455.16, Found 455.16.

### 1.5 The synthesis of deprotected BINMOL-derived aldehyde (Step d):

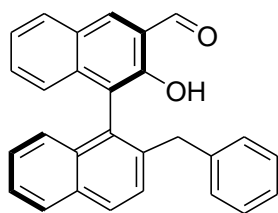

**D**

To a solution of compound **C** (3.03 g, 7 mmol) in THF (75 ml) were added slowly Conc. HCl (75 ml) at 0 °C. The mixture was stirred for 2 h at room temperature. Then water was added, The resultant mixture was extracted with ethyl acetate, and washed with saturated NaHCO<sub>3</sub>, water and saturated NaCl solution. The organic layer was dried over Na<sub>2</sub>SO<sub>4</sub>, concentrated, and the residue was purified by column chromatography (hexanes/ethyl acetate = 10/1) to give the desired product **D** (2.58 g, 95% yield) as a yellow power. <sup>1</sup>H NMR (CDCl<sub>3</sub>, 400 MHz) δ 10.04 (s, H), 10.18 (s, H), 8.42 (s, H), 7.87 (d, *J*=8.8 Hz, 3H), 7.70 (s, H), 7.46-7.43 (m, 2H), 7.36 (d, *J*=8.0 Hz, 2H), 7.36 (d, *J*=8.0 Hz, 2H), 7.06 (s, 4H), 6.94 (d, *J*=8.4 Hz, 3H), 3.78 (d, *J*=5.6 Hz, 2H). <sup>13</sup>C NMR (CDCl<sub>3</sub>, 100 MHz) δ 196.8, 153.4, 140.7, 138.5, 138.0, 137.7, 132.9, 132.5, 130.6, 129.8, 129.2, 128.5, 128.2, 128.2, 128.1, 127.5, 126.4, 125.8, 125.7,

125.4, 125.2, 124.5, 122.1, 120.8, 77.4, 77.1, 76.8, 39.9 ppm. **IR (neat, cm<sup>-1</sup>):** 3428, 3150, 3059, 2838, 1792, 1655, 1629, 1577, 1506, 1452, 1443, 1412, 1384, 1292, 1254, 1225, 1212, 1179, 1142, 1115, 1073, 1054, 1025, 952, 936, 923, 895, 879, 856, 809, 796, 778, 757, 711, 697, 681 cm<sup>-1</sup>. Exact mass calcd for C<sub>28</sub>H<sub>20</sub>O<sub>2</sub> [M]<sup>+</sup>, 388.15. Found 388.15;

### 1.6 The synthesis of BINMOL-derived salen:

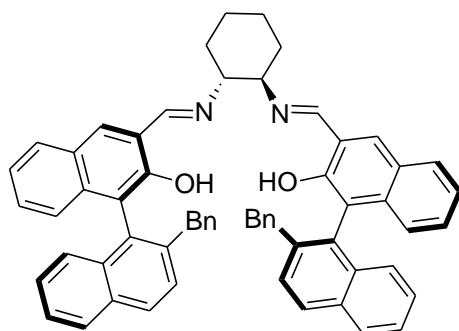

**BINMOL-derived Salen**

To a solution of (1R,2R)- diaminocyclohexane tartrate (0.66 g , 2.5 mmol) and K<sub>2</sub>CO<sub>3</sub> (0.7 g , 5 mmol) in 50% ethanol(12 ml) were added slowly compound **D** (1.94 g , 5 mmol) in ethanol(24ml) at room temperature. After the addition, the solution was allowed to stir at room temperature for 48h. The precipitate was collected by filtration, washed with ice ethanol, and dried in vacuum oven to obtain the product **E** (2.03 g , 95% yield) as a pale yellow power. <sup>1</sup>H NMR(CDCl<sub>3</sub>, 400 MHz) δ 8.45(s, H), 8.34 (s, H), 8.01 (t, *J* = 7.2 Hz, H), 7.90 (d, *J* = 8.8 Hz, 4H), 7.76 (t, *J* = 8.0 Hz, 4H), 7.49-7.46 (m, 3H), 7.40 (s, H), 7.38 (s, H), 7.30 (s, H), 7.22 (s, H), 7.11-7.08 (m, 7H), 7.00 (s, H), 6.97 (d, *J* = 8.0 Hz, 5H), 6.94 (s, H), 6.92 (s, H), 3.81 (d, *J* = 5.6 Hz, 4H), 3.32-3.30 (m, 2H), 1.99 (d, *J* = 13.6 Hz, 2H), 1.89 (d, *J* = 8.8 Hz, 2H), 1.70 (d, *J* = 11.2 Hz, 2H), 1.46 (t, *J* = 10.0 Hz, 2H). <sup>13</sup>C NMR (CDCl<sub>3</sub>, 100 MHz) δ 196.8, 165.0, 154.4, 141.0, 138.4, 138.0, 133.3, 129.3, 129.2, 128.9, 128.3, 128.2, 128.2, 128.0, 126.4, 126.1, 125.8, 125.8, 125.7, 125.6, 125.5, 125.2, 125.2, 124.7, 124.5, 123.3, 120.4, 119.3, 77.4, 77.1 , 76.8, 39.9 ppm. **IR(neat, cm<sup>-1</sup>):** 3403, 3055, 2929, 2856, 1629, 1597, 1506, 1494, 1443, 1380, 1348, 1294, 1258, 1180, 1143, 1115, 1062, 1024, 941, 915, 808, 746, 712, 697 cm<sup>-1</sup>. Exact mass calcd for C<sub>62</sub>H<sub>50</sub>N<sub>2</sub>O<sub>2</sub> [M+H]<sup>+</sup>, 855.39, Found 855.39.

## 1.7 The Synthesis of Salen Ligands:

Similarly to the synthesis of salen ligands (2-3):

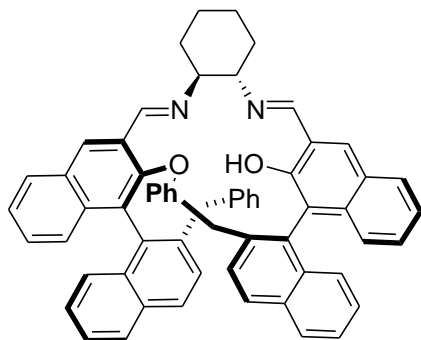

**Salen-2:**  $^1\text{H-NMR}$  (500 MHz,  $\text{CDCl}_3$ )  $\delta$ ppm: 7.53-7.54 (m, 2H), 7.97 (s, 4H), 7.81-7.84 (m, 4H), 7.55-7.58 (m, 2H), 7.43-7.45 (m, 2H), 7.34-7.37 (m, 2H), 7.29-7.31 (m, 2H), 7.09-7.20 (m, 4H), 6.99-7.02 (m, 10H), 4.22-4.25 (m, 2H), 3.85-3.92 (m, 4H), 3.40-3.41 (d, 2H), 2.33-2.34 (d, 6H), 1.95-1.96 (d, 2H), 1.81 (s, 2H), 1.35-1.41 (m, 4H);  $^{13}\text{C NMR}$  (125 MHz,  $\text{CDCl}_3$ )  $\delta$ ppm: 165.2, 154.5, 138.7, 136.1, 135.4, 135.0, 133.4, 133.2, 132.6, 132.0, 129.3, 129.0, 128.9, 128.4, 128.1, 127.5, 126.2, 126.0, 125.2, 124.9, 123.4, 120.6, 119.5, 73.2, 60.5, 39.5, 32.9, 24.2, 21.1, 14.3. **FTIR**  $\nu_{\text{max}}$  (**KBr**)/ $\text{cm}^{-1}$ : 3053, 2930, 2854, 2659, 1946, 1628, 1507, 1445, 1347, 1257, 1147, 1099, 943, 890, 804, 745, 713, 698, 496, 434.

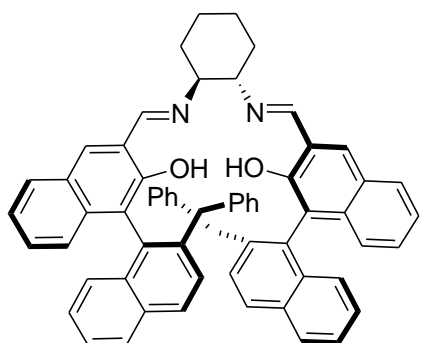

**Salen-3:**  $^1\text{H NMR}$  (500 MHz,  $\text{CDCl}_3$ )  $\delta$ ppm: 13.09- 13.11 (m, 2H), 8.49 - 8.51 (m, 2H), 7.93-7.94 (m, 4H), 7.78 - 7.81 (m, 4H), 7.52 - 7.55 (m, 2H), 7.42-7.43 (m,2H), 7.33-7.34 (m, 2H), 7.26-7.27 (m, 2H), 6.94 -7.16 (m, 16H), 3.87-3.91 (m, 4H), 3.37 (s, 2H), 2.03-2.06 (d,  $J = 12.0$  Hz, 2H), 1.93 (s, 2H), 1.77 (s, 2H), 1.51 (s, 2H);  $^{13}\text{C NMR}$  (125 MHz,  $\text{CDCl}_3$ )  $\delta$ ppm : 165.1, 154.5, 141.1, 138.4, 135.3, 135.3, 135.3, 133.1, 132.1, 129.4, 128.9, 128.4, 128.1, 128.06, 127.4, 126.2, 125.9, 125.7, 125.3, 124.8, 123.3, 120.5, 119.4, 73.2, 40.0, 32.8, 24.2.

## 1.8 The synthesis and characterization of product Salen-1b:

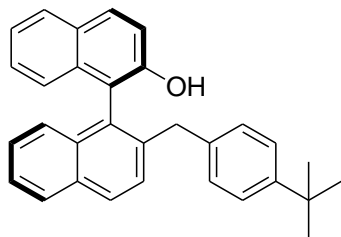

**The characterization of product Salen1b-A:** <sup>1</sup>H NMR (500 MHz, CDCl<sub>3</sub>) δppm: 7.94-8.04 (m, 4H), 7.59-7.61 (dd, J = 2.0, 8.5 Hz, 1H), 7.53-7.55 (m, 1H), 7.45-7.47 (m, 1H), 7.36-7.42 (m, 3H), 7.23-7.29 (m, 3H), 7.08-7.10 (d, J = 8.5Hz, 1H), 6.94-6.96 (m, 2H), 5.00 (s, 1H), 3.86 (s, 2H), 1.37-1.38 (d, J = 4.0 Hz, 9H); <sup>13</sup>C NMR (125 MHz, CDCl<sub>3</sub>) δppm : 151.3, 148.8, 140.7, 137.3, 133.9, 133.5, 132.8, 130.1, 129.3, 129.2, 128.9, 128.6, 128.2, 127.0, 126.04, 126.0, 125.3, 124.9, 123.5, 117.7, 117.5, 39.4, 34.4, 31.5; FTIR  $\nu_{\max}$  (KBr)/cm<sup>-1</sup>: 3508, 3055, 2961, 2867, 2355, 1907, 1619, 1595, 1515, 1468, 1266, 1201, 1175, 1143, 1022, 816, 746, 561, 432.

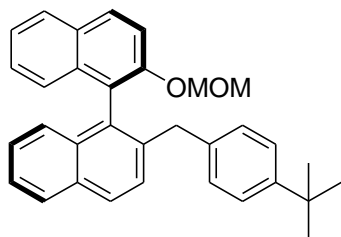

**The characterization of product Salen1b-B:** <sup>1</sup>H NMR (500 MHz, CDCl<sub>3</sub>) δppm: 13.3 (s, 2H), 8.39 (s, 2H), 7.89-7.90 (m, 4H), 7.38-7.42 (m, 6H), 7.32-7.34 (d, J = 8.0 Hz, 2H), 7.25- 7.26 (t, J = 3.0 Hz, 4H), 7.10-7.14 (m, 10H), 7.01-7.02 (d, J = 7.0 Hz, 4H), 6.91-6.92 (d, J = 8.0 Hz, 2H), 3.72-3.75 (d, J = 15.0 Hz, 2H), 3.58-3.61 (d, J = 15.0 Hz, 2H), 3.32-3.35 (d, J = 13.5 Hz, 2H), 2.04-2.07 (d, J = 13.5 Hz, 2H), 1.47-1.51 (t, J = 10.0 Hz, 2H); <sup>13</sup>C NMR (125 MHz, CDCl<sub>3</sub>) δppm : 165.1, 154.2, 141.3, 138.6, 135.3, 133.2, 133.0, 132.5, 131.9, 129.6, 128.8, 128.1, 128.06, 128.0, 127.2, 126.2, 125.2, 124.6, 123.2, 120.3, 119.3, 73.2, 39.6, 32.5, 24.1; FTIR  $\nu_{\max}$  (KBr)/cm<sup>-1</sup>: 3458, 3054, 2960, 2902, 2358, 1914, 1622, 1593, 1507, 1362, 1244, 1197, 1067, 1034, 1015, 922, 812, 749, 561.



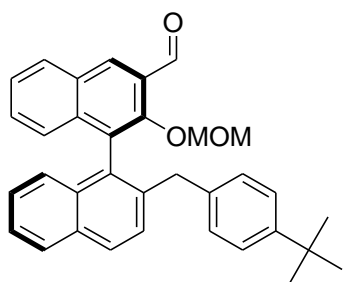

**The characterization of product Salen1b-C:** <sup>1</sup>H NMR (400 MHz, CDCl<sub>3</sub>) δppm: 10.64 (s, 1H), 8.62 (s, 1H), 8.04 (s, 1H), 7.92-8.02 (m, 2H), 6.98-7.31 (m, 9H), 6.77 (d, J = 8.4 Hz, 2H), 4.57-4.71 (m, 2H), 3.80-3.96 (m, 2H), 2.96 (s, 3H), 1.24 (s, 9H); <sup>13</sup>C NMR (100 MHz, CDCl<sub>3</sub>) δppm: 191.1, 153.1, 148.5, 139.2, 127.1, 137.0, 133.4, 132.3, 131.8, 131.1, 130.0, 129.1, 129.0, 128.7, 128.6, 128.4, 128.1, 126.3, 126.2, 126.0, 125.4, 124.9, 99.9, 39.7, 34.3, 31.4. FTIR ν<sub>max</sub> (KBr)/cm<sup>-1</sup>: 3456, 3054, 2960, 2903, 2868, 2359, 1911, 1690, 1619, 1587, 1508, 1450, 1268, 1157, 1075, 966, 925, 815, 756, 563.

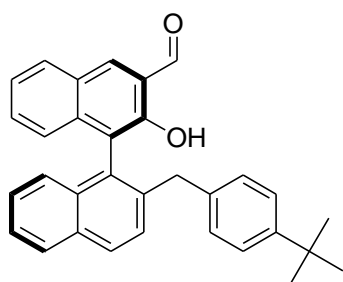

**The characterization of product Salen1b-D:** <sup>1</sup>H NMR (500 MHz, CDCl<sub>3</sub>) δppm: 10.43-10.45 (m, 1 H), 10.91 (s, 1 H), 8.31 (s, 1 H), 7.96-7.99 (s, 3 H), 6.87-7.60 (m, 11 H), 3.84-3.85 (m, 2 H), 1.29-1.31 (m, 9 H); <sup>13</sup>C NMR (125 MHz, CDCl<sub>3</sub>) δppm : 196.7, 153.4, 148.5, 138.8, 137.95, 137.88, 137.6, 133.0, 132.6, 130.7, 130.4, 129.8, 128.8, 128.5, 128.3, 127.5, 12.4, 125.8, 125.3, 125.0, 122.1, 120.9, 39.6, 34.3, 31.4. FTIR ν<sub>max</sub> (KBr)/cm<sup>-1</sup>: 3202, 3054, 2960, 2859, 1918, 1653, 1629, 1504, 1411, 1386, 1339, 1295, 1116, 1055, 936, 838, 815, 777, 754, 604, 434.

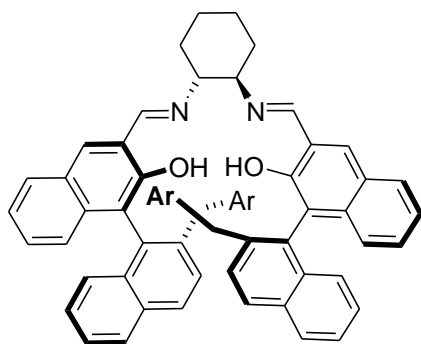

**1b:** Ar = *p*-*t*-BuPh

**The characterization of product Salen-1b:**  $^1\text{H NMR}$  (500 MHz,  $\text{CDCl}_3$ )  $\delta$ ppm: 13.4 (s, 2H), 8.35 (s, 2H), 7.88-7.90 (dd,  $J = 3.0$  Hz, 8.5 Hz, 4H), 7.47-7.49 (d,  $J = 8.5$  Hz, 2H), 7.38- 7.42 (m, 2H), 7.29 (s, 2H), 7.22-7.23 (d,  $J = 3.5$  Hz, 4H), 7.10-7.12 (dd,  $J = 2.0$  Hz, 8.5Hz, 6H), 6.90-7.04 (m, 8H), 3.78-3.82 (d,  $J = 15.5$  Hz, 2H), 3.64-3.67 (d,  $J = 15.5$  Hz, 2H), 3.31-3.33 (dd,  $J = 4.0$  Hz, 6.0 Hz, 2H), 2.07-2.10 (d,  $J = 13.5$  Hz, 2H), 1.90-1.92 (d,  $J = 8.5$  Hz, 2H), 1.77-1.79 (m, 2H), 1.47-1.51 (t,  $J = 5.0$  Hz, 2H), 1.27 (s, 18H);  $^{13}\text{C NMR}$  (125 MHz,  $\text{CDCl}_3$ )  $\delta$ ppm :165.2, 154.0, 148.4, 138.8, 138.0, 135.3, 133.2, 132.5, 131.9, 129.2, 128.7, 128.1, 127.2, 126.1, 126.09, 125.1, 125.0, 124.6, 123.0, 120.2, 119.4, 39.4, 34.3, 32.3, 31.5, 21.1. **FTIR**  $\nu_{\text{max}}$  (KBr)/ $\text{cm}^{-1}$ : 3053, 2959, 2861, 2361, 1910, 1630, 1507, 1442, 1344, 1258, 1145, 1117, 1022, 943, 812, 747, 566, 433.

### 1.9 The synthesis and characterization of product Salen 1c:

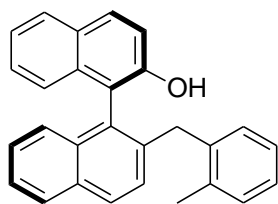

#### The characterization of product Salen1c-A:

$^1\text{H NMR}$  (500 MHz,  $\text{CDCl}_3$ )  $\delta$ ppm: 7.9-8.03(m, 4 H), 7.54-7.57(td,  $J=1, 6.5$  Hz, 1 H), 7.33-7.48(m, 6 H), 7.16-7.21(m, 4 H), 7.08-7.09(d,  $J=7\text{Hz}$ , 1 H), 4.96(s, 1 H), 3.86-3.96(q,  $J=16.5\text{Hz}$ , 2 H), 2.09(s, 3H);  $^{13}\text{C NMR}$  (125 MHz,  $\text{CDCl}_3$ )  $\delta$ ppm: 151.2, 139.9, 138.3, 136.7, 13.6, 133.4, 132.7, 130.3, 130.3, 130.1, 129.5, 129.4, 129.2, 128.3, 128.2, 127.6, 127.1, 126.8, 126.3, 126.1, 126.0, 125.8, 124.4, 123.6, 117.8, 117.5, 37.1, 19.7; **FTIR**  $\nu_{\text{max}}$  (KBr)/ $\text{cm}^{-1}$ : 3454, 2084, 1632, 1508, 1457, 1340, 1178,

1143, 494.

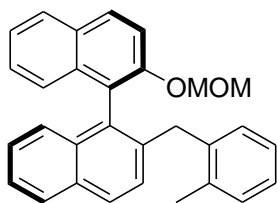

**The characterization of product Salen1c-B:**

**<sup>1</sup>H NMR** (500 MHz, CDCl<sub>3</sub>) δppm: 8.05-8.16(m, 4 H), 7.80-7.83(m, 1 H), 7.70-7.74(m, 1 H), 7.20-7.59(m, 7 H), 7.01-7.10(dd, J=7 Hz, 2 H), 6.91(s, 1H), 5.16-5.18(m, 1H), 5.06-5.08(m, 1H), 4.01(s, 2H), 3.33-3.45(m, 3H), 2.37(s, 3H); **<sup>13</sup>C NMR** (125 MHz, CDCl<sub>3</sub>) δppm: 152.8, 141.1, 138.4, 137.6, 134.2, 133.6, 132.9, 132.6, 130.3, 130.0, 129.8, 128.4, 128.0, 126.7, 126.6, 126.5, 126.4, 125.7, 125.4, 124.3, 123.7, 116.7, 94.9, 55.9, 40.1, 21.5; **FTIR**  $\nu_{\max}$  (KBr)/cm<sup>-1</sup>: 3529, 3485, 3044, 2958, 2924, 1905, 1594, 1507, 1304, 1196, 1147, 1067, 1034, 924, 808, 745, 440.

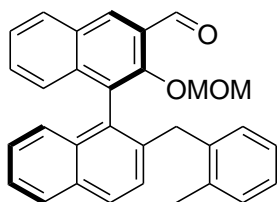

**The characterization of product Salen1c-C:**

**<sup>1</sup>H NMR** (500 MHz, CDCl<sub>3</sub>) δppm: 10.65 (s, 1H), 8.4(s, 1H), 8.07-8.09(d, J =8 Hz, 1H), 7.91-7.95 (t, J= 9Hz, 2H), 7.46-7.51(dd, J=7.5, 14.5Hz, 2 H), 7.24-7.37(m, 4H), 7.18-7.19(d, J=8.5Hz, 1H), 7.00-7.08(m, 4H), 4.76-4.77(d, J=6Hz, 1H), 4.61-4.63(d, J=Hz, 1H), 4.02-4.06(d, J=16.5Hz, 1H), 3.76-3.79(d, J=17Hz, 1H), 2.97(s, 3H), 2.04(s, 3H); **<sup>13</sup>C NMR** (125 MHz, CDCl<sub>3</sub>) δppm: 190.1, 152.3, 138.1, 136.7, 136.7, 133.4, 133.2, 131.9, 131.2, 130.4, 130.3, 130.1, 129.3, 129.2, 129.1, 128.6, 128.1, 127.2, 126.5, 126.4, 126.2, 126.1, 125.9, 125.4, 100.0, 57.0, 37.4, 19.7; **FTIR**  $\nu_{\max}$  (KBr)/cm<sup>-1</sup>: 3458, 2359, 1687, 1654, 1581, 1508, 1355, 1260, 1180, 1155, 1104, 964, 810, 755, 554, 500.

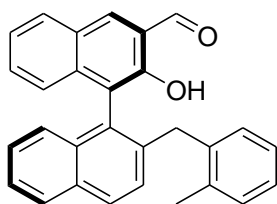

**The characterization of product Salen1c-D:**

**$^1\text{H}$  NMR** (500 MHz,  $\text{CDCl}_3$ )  $\delta$ ppm: 10.66(s, 1H), 8.66(s, 1H), 8.0-8.08(d,  $J=8\text{Hz}$ , 1H), 7.94-7.98(dd,  $J=9, 11.5\text{Hz}$ , 2H), 7.45-7.55(m, 3H), 7.25-7.33(m, 3H), 7.08-7.12(m, 4H), 6.93-6.95(d,  $J=8\text{Hz}$ , 2H), 4.74-4.75(d,  $J=5.5\text{Hz}$ , 1H), 4.61-4.62(d,  $J=5.5\text{Hz}$ , 1H), 3.98-4.00(d,  $J=15.5\text{Hz}$ , 1H), 3.84-3.88(d,  $J=5.5\text{Hz}$ , 1H), 2.98(s, 3H);  **$^{13}\text{C}$  NMR** (125 MHz,  $\text{CDCl}_3$ )  $\delta$ ppm: 191.0, 153.2, 138.9, 136.9, 133.4, 132.3, 132.2, 131.1, 130.2, 129.2, 129.1, 129.0, 128.6, 128.2, 126.6, 126.3, 126.0, 125.9, 125.5, 99.9, 57.0, 40.1; **FTIR**  $\nu_{\text{max}}$  ( $\text{KBr}$ )/ $\text{cm}^{-1}$ : 3478, 3054, 2855, 2354, 1658, 1631, 1504, 1338, 1296, 1118, 933, 895, 815, 749, 507, 434.

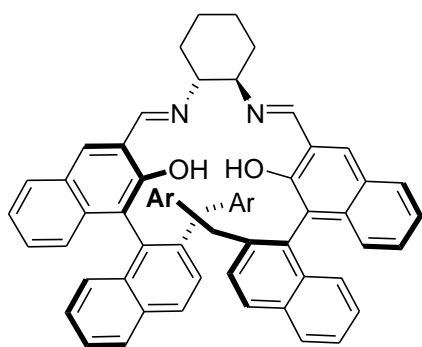

**salen1c:** Ar = *o*-MePh

#### The characterization of product Salen1c:

**$^1\text{H}$  NMR** (400 MHz,  $\text{CDCl}_3$ )  $\delta$ ppm: 13.03(s, 2H), 8.40(s, 2H), 7.80-7.86(m, 4H), 7.68-7.72(t,  $J=8.8\text{Hz}$ , 4H), 7.31-7.35(t,  $J=8.8\text{Hz}$ , 2H), 7.17-7.26(m, 8H), 6.98-7.05(m, 12H), 6.87-6.91(t,  $J=8\text{Hz}$ , 2H), 3.81-3.84(d,  $J=16\text{Hz}$ , 2H), 3.68-3.72(d,  $J=16\text{Hz}$ , 2H), 3.26-3.28(m, 2H), 1.95(s, 6H), 1.83-1.85(d,  $J=8.8\text{Hz}$ , 2H), 1.66-1.68(d,  $J=6\text{Hz}$ , 2H), 1.36-1.48(m, 2H);  **$^{13}\text{C}$  NMR** (100 MHz,  $\text{CDCl}_3$ )  $\delta$ ppm: 165.0, 154.3, 138.7, 137.8, 136.7, 135.0, 133.2, 133.0, 132.4, 132.0, 130.5, 129.8, 128.8, 128.2, 128.0, 127.9, 127.4, 127.1, 126.1, 126.0, 125.7, 125.6, 125.0, 124.7, 123.2, 120.5, 119.3, 73.0, 37.1, 32.7, 24.1, 19.6; **FTIR**  $\nu_{\text{max}}$  ( $\text{KBr}$ )/ $\text{cm}^{-1}$ : 3054, 2934, 2858, 2836, 1633, 1508, 1462, 1301, 1259, 1215, 1143, 947, 882, 859, 769, 747, 619, 434.

#### The synthesis and characterization of product Salen-1d:

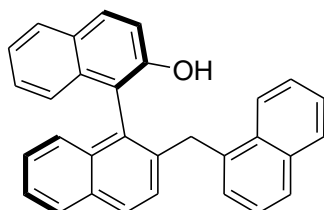

**The characterization of product Salen1d-A:**

$^1\text{H NMR}$  (400 MHz,  $\text{CDCl}_3$ )  $\delta$ ppm:7.81-7.86(dd,  $J=8\text{Hz}$ , 2H), 7.76-7.78(d,  $J=8.4\text{Hz}$ , 1H), 7.71-7.73(d,  $J=8\text{Hz}$ , 1H), 7.72-7.9(m, 3H), 7.34-7.38(t,  $J=7.2\text{Hz}$ , 1H), 7.12-7.32(m,11H), 5.19(s, 1H), 3.61-3.64(t,  $J=6.4\text{Hz}$ , 2H);  $^{13}\text{C NMR}$  (101 MHz,  $\text{CDCl}_3$ )  $\delta$ ppm:151.4, 139.9, 136.1, 133.9, 133.8, 133.3, 132.7, 132.2, 130.1, 129.4, 129.2, 129.1, 128.6, 128.4, 128.2, 128.0, 127.5, 127.2, 127.0, 126.8, 125.9, 125.8, 125.5, 125.5, 124.8, 124.4, 123.6, 117.8, 117.4, 68.0, 36.7, 25.6; **FTIR**  $\nu_{\text{max}}$  (**KBr**)/ $\text{cm}^{-1}$ : 3486, 3055, 2359, 1620, 1595, 1507, 1379, 1262, 1201, 1174, 1143, 817, 749, 419.

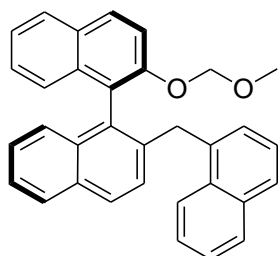

**The characterization of product Salen1d-B:**

$^1\text{H NMR}$  (500 MHz,  $\text{CDCl}_3$ )  $\delta$  ppm:7.82-7.84(d,  $J=9.2\text{Hz}$ , 1H), 7.76-7.78(d,  $J=8\text{Hz}$ , 1H), 7.62-7.73 (m, 4H), 7.55-7.57 (d,  $J=8.4\text{Hz}$ , 1H), 7.48-7.50(d,  $J=9.2\text{Hz}$ , 1H), 7.08-7.26(m, 11H), 4.94-4.96(d,  $J=6.8\text{Hz}$ , 1H), 4.86-4.87(d,  $J=6.8\text{Hz}$ , 1H), 4.16-4.20(d,  $J=16.4$ , 1H), 4.03-4.07(d,  $J=16.8\text{Hz}$ , 1H), 3.04(s, 3H);  $^{13}\text{C NMR}$  (100 MHz,  $\text{CDCl}_3$ )  $\delta$  ppm: 152.7, 137.9, 136.6, 133.9, 133.4, 132.6, 132.4, 132.0, 129.8, 128.5, 128.2, 128.0, 127.9, 127.8, 127.3, 127.0, 126.7, 126.3, 126.0, 125.6, 125.5, 125.4, 125.2, 124.8, 124.3, 122.9, 116.7, 95.2, 55.9, 37.2; **FTIR**  $\nu_{\text{max}}$  (**KBr**)/ $\text{cm}^{-1}$ : 3462, 1636, 1507, 1472, 1397, 1259, 1240, 1196, 1066, 1032, 749.

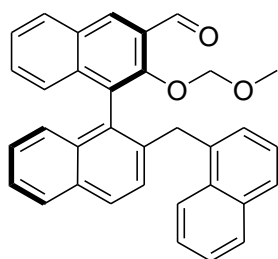

### The characterization of product Salen1d-C:

$^1\text{H NMR}$  (400 MHz,  $\text{CDCl}_3$ )  $\delta$ ppm: 10.56(s,1H), 8.52(s, 1H), 7.97-7.99(d, J=8Hz, 1H), 7.82-7.84(d, J=8Hz, 1H), 7.68-7.77(m,3H), 7.59-7.61(d, J=8Hz, 1H), 7.37-7.44(m, 2H), 7.28-7.34(dd, J=6.8, 15.2Hz, 2H), 7.13-7.28(m, 7H), 4.73-4.74(d, J=6Hz, 1H), 4.58-4.59(d, J=6Hz, 1H), 4.37-4.42(d, J=16.8Hz, 1H), 4.14-4.18(d, J=16.4Hz, 1H), 2.9(s, 3H);  $^{13}\text{C NMR}$  (100 MHz,  $\text{CDCl}_3$ )  $\delta$  ppm: 190.9, 153.2, 138.7, 136.6, 135.9, 133.8, 133.3, 133.2, 133.0, 132.2, 132.0, 130.8, 129.2, 129.0, 128.5, 128.5, 128.1, 128.0, 127.3, 127.0, 126.5, 126.1, 125.5, 125.3, 124.4, 100.1, 57.0, 37.1; **FTIR**  $\nu_{\text{max}}$  (KBr)/ $\text{cm}^{-1}$ : 3453, 2280, 1685, 1636, 1356, 1157, 1074, 962, 749.

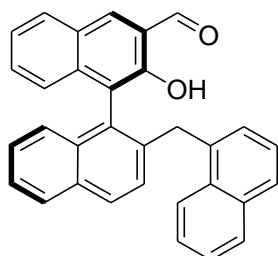

### The characterization of product Salen1d-D:

$^1\text{H NMR}$  (400 MHz,  $\text{CDCl}_3$ )  $\delta$ ppm: 10.50(s, 1H), 10.04(s, 1H), 8.14(s, 1H), 7.85-7.88(dd, J=3.6, 6.8Hz, 1H), 7.79-7.81(d, J=8Hz, 1H), 7.69-7.74(m, 2H), 7.58-7.60(d, J=8Hz, 1H), 7.28-7.37(m, 4H), 7.12-7.24(m, 7H), 4.26-4.30(d, J=16.4Hz, 1H), 4.11-4.15(d, J=16.4Hz, 1H);  $^{13}\text{C NMR}$  (101 MHz,  $\text{CDCl}_3$ )  $\delta$ ppm: 196.8, 153.3, 138.3, 138.0, 137.6, 136.2, 133.6, 132.9, 132.5, 132.2, 130.5, 130.4, 129.9, 128.4, 128.2, 128.0, 127.6, 126.9, 126.3, 125.7, 125.4, 125.2, 124.6, 124.5, 122.1, 37.0. **FTIR**  $\nu_{\text{max}}$  (KBr)/ $\text{cm}^{-1}$ : 3184, 3049, 2913, 2842, 1943, 1653, 1626, 1504, 1384, 1292, 1177, 895, 827, 793, 774, 752, 507, 431.

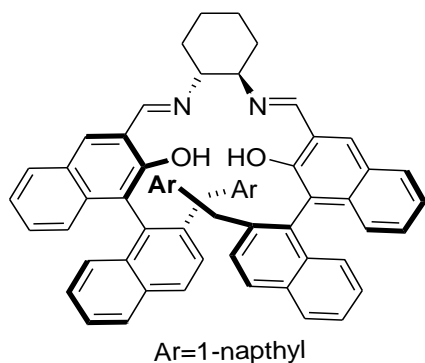

### The characterization of product Salen 1d:

**<sup>1</sup>H NMR** (400 MHz, CDCl<sub>3</sub>) δppm: 13.19(s, 2H), 8.42(s, 2H), 7.79-7.87(m, 4H), 7.62-7.74(m, 10H), 7.47-7.55(m, 2H), 7.18-7.36 (m, 16H), 7.09-7.11 (m, 4H), 6.88-6.94(m, 2 H), 4.28-4.35(m, 2 H), 4.12-4.17(m, 2 H), 3.12-3.32(m, 2 H), 1.40-2.00(m, 8H); **<sup>13</sup>C NMR** (101 MHz, CDCl<sub>3</sub>) δ ppm: 162.6, 151.9, 135.7, 134.1, 132.6, 131.3, 130.9, 130.6, 129.9, 129.3, 128.1, 127.4, 126.5, 126.4, 126.0, 125.9, 125.8, 125.7, 125.6, 125.1, 125.0, 124.9, 124.7, 124.3, 123.7, 123.4, 123.2, 123.1, 123.0, 122.9, 122.8, 122.7, 122.5, 122.4, 122.3, 120.9, 118.1, 116.9, 70.7, 34.5, 30.3, 21.7; **FTIR**  $\nu_{\max}$  (KBr)/cm<sup>-1</sup>: 3179, 3050, 3008, 2929, 2857, 2302, 1919, 1629, 1507, 1442, 1383, 1342, 1295, 1115, 944, 858, 776, 749, 432.

### **S-3. The synthesis of (Salen)Mn(III)-X catalysts**

#### **3.1 Typical procedure of synthesis of (Salen)Mn(III)-Cl:**

Salen(1.57g, 1.83 mmol, 1eq) and manganese(II) acetate tetrahydrate (1.34, 5.47mmol, 3eq) were added to 20 mL of ethanol, and the mixture was refluxed for 3 h in air. Upon cooling, 20 mL of an aqueous saturated sodium chloride solution was added, and after stirring for 2h, an additional 10 mL of water was added. The mixture was then extracted with 20 mL of dichloromethane. The combined organic portions were then washed with 5 mL of water and dried over MgSO<sub>4</sub>. The solvent was removed by rotary evaporation, the dark brown solid is dissolved in 20 mL of methylene chloride in a 1-L, round-bottomed flask. Heptane (100 mL) is added, and the methylene chloride is removed by reduced pressure rotary evaporation. After complete removal of the methylene chloride, the brown slurry is stirred for 1 hr at ≤5°C in an ice bath. The brown solid is collected by vacuum filtration and allowed to air dry. Heating of the solid at 50-60 °C under high vacuum removes any residual solvent to yield the brown product (1.60 g, 93% yield). Element Analysis: Calcd for C<sub>62</sub>H<sub>48</sub>MnN<sub>2</sub>O<sub>2</sub>: C 78.88, H: 5.13, N: 2.99 Found: C 78.29, H: 4.63, N: 2.80

**C1a: FTIR**  $\nu_{\max}$  (KBr)/cm<sup>-1</sup>: 3644, 3054, 2925, 2857, 1948, 1610, 1492, 1309, 1189, 952, 800, 758, 689, 537. **ESI-MS (m/z):** [M]<sup>+</sup> calcd for C<sub>62</sub>H<sub>48</sub>MnN<sub>2</sub>O<sub>2</sub> 907.3,

found 907.3.

**C1b: FTIR  $\nu_{\max}$  (KBr)/ $\text{cm}^{-1}$ :** 3645, 3052, 2955, 2902, 2862, 1909, 1609, 1508, 1310, 952, 860, 757, 689, 567; **ESI-MS (m/z):**  $[\text{M}]^+$  calcd for  $\text{C}_{70}\text{H}_{64}\text{MnN}_2\text{O}_2$  1019.4, found 1019.4.

**C1c: FTIR  $\nu_{\max}$  (KBr)/ $\text{cm}^{-1}$ :** 3645, 3051, 2931, 2858, 1914, 1609, 1449, 1320, 1222, 1189, 952, 760, 688, 569; **ESI-MS (m/z):**  $[\text{M}]^+$  calcd for  $\text{C}_{64}\text{H}_{52}\text{MnN}_2\text{O}_2$  935.3, found 935.3.

**C1d: FTIR  $\nu_{\max}$  (KBr)/ $\text{cm}^{-1}$ :** 3436, 3048, 2934, 2858, 1940, 1609, 1555, 1507, 1447, 1347, 1371, 1026, 951, 758, 689, 570; **ESI-MS (m/z):**  $[\text{M}]^+$  calcd for  $\text{C}_{70}\text{H}_{52}\text{MnN}_2\text{O}_2$  1007.3, found 1007.3.

**C2: FTIR  $\nu_{\max}$  (KBr)/ $\text{cm}^{-1}$ :** 3645, 3045, 3025, 2930, 2857, 1947, 1609, 1493, 1449, 1347, 951, 802, 745, 715, 568. **ESI-MS (m/z):**  $[\text{M}]^+$  calcd for  $\text{C}_{62}\text{H}_{48}\text{MnN}_2\text{O}_2$  907.3, found 907.3.

**C3: FTIR  $\nu_{\max}$  (KBr)/ $\text{cm}^{-1}$ :** 3645, 3053, 2931, 2858, 1609, 1449, 1309, 1221, 1189, 951, 759, 690, 658, 537. **ESI-MS (m/z):**  $[\text{M}]^+$  calcd for  $\text{C}_{62}\text{H}_{48}\text{MnN}_2\text{O}_2$  907.3, found 907.3.

### 3.2 Typical procedure of synthesis of (Salen)Mn-OAc:

An appropriate amount of salen ligands (**Salen-1a**, 0.253 mmol, 0.216 g) was separately dissolved in absolute ethanol in nitrogen atmosphere under vigorous stirring. Then was added  $\text{Mn}(\text{OAc})_2 \cdot 4\text{H}_2\text{O}$  (0.253 mmol, 0.062 g), and the resulting mixture was refluxed for 7 h in nitrogen atmosphere until the complete reaction of ligand compound (checked by TLC). Finally, the precipitate complexes were recovered by filtration, and washed several times with absolute ethanol and dichloromethane, dried in vacuum at 65 °C for 5 h, and again purified by re-crystallization in acetone to get the brown product in a 88% yield. **FTIR  $\nu_{\max}$  (KBr)/ $\text{cm}^{-1}$ :** 3643, 3203, 3054, 2933, 2859, 1946, 1819, 1610, 1554, 1422, 1323, 1027, 952, 801, 757, 689, 567, 535. **ESI-MS (m/z):**  $[\text{M}]^+$  calcd for  $\text{C}_{62}\text{H}_{48}\text{MnN}_2\text{O}_2$  907.3, found 907.3.



### 3.3 Typical procedure of synthesis of (Salen)Mn-OTf:

Manganese(II) acetate tetrahydrate (1.55 g, 6.32 mmol) was added to the solution of Salen 1a (2.7g, 3.16 mmol) in N,N-dimethylformamide (20 mL). The resulting solution was heated at 100 °C for 3 h. After cooling, the solvent was removed by evaporation under reduced pressure, and then dried in vacuo at 80 °C for 12 h. The residue dissolved in CH<sub>2</sub>Cl<sub>2</sub> (200 mL) was washed with aqueous trifluoromethanesulfonic acid solution (0.5 M, 100 mL × 3). The organic layer was dried over MgSO<sub>4</sub>, and the solvent was removed by evaporation under reduced pressure. The residue was then dissolved in CH<sub>2</sub>Cl<sub>2</sub> (~10 mL), and the resulting solution was passed through a membrane filter (Millex®-FG, pore size 0.20 μm, diameter 25 mm, S22 Millipore). The addition of pentane (~50 mL) afforded Mn (III) (2.77, 2.62 mmol) as a brown solid in a 83% yield. **FTIR**  $\nu_{\max}$  (KBr)/cm<sup>-1</sup>: 3183, 3055, 2933, 2858, 1651, 1610, 1505, 1451, 1347, 1245, 1152, 1029, 804, 747, 638, 571, 510. **ESI-MS** (m/z): [M]<sup>+</sup>calcd for C<sub>62</sub>H<sub>48</sub>MnN<sub>2</sub>O<sub>2</sub> 907.3, found 907.3.

### S-4. General procedure for the asymmetric cyanosilylation

**General procedure of silylcyanation of the aldehydes catalyzed by Mn(salen) and POPh3:** The aldehyde (0.5 mmol) was added to a stirred DCE solution of the catalyst [3 mol% Mn(salen), 20 mol% Ph<sub>3</sub>PO] and the mixture stirred for 30 min at -10 °C. TMSCN (0.75 mmol) was then added with a syringe and the mixture was stirred at the same temperature for 24 h. The solvent was then evaporated, 2N HCl (10 mL) was added, and the mixture was stirred vigorously at room temp. for 2 h to hydrolyze the trimethylsilyl ether. After addition of ethylacetate (10 ml), the mixture was stirred for 30 min. The organic layer was separated and washed with H<sub>2</sub>O. The aqueous layer was extracted with ethyl acetate (2 ×20 mL), and the combined organiclayers were washed with brine and dried with Na<sub>2</sub>SO<sub>4</sub>.The crude product was further purified by flash chromatography and ee % was determined by chiral high pressureliquid

chromatography (HPLC) column .

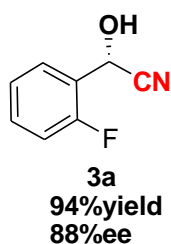

2-Hydroxy-2-(2- Fluorophenyl) acetonitrile (**3a**) (yellow oil) was obtained according to the general procedure (94% yield). Enantiomeric excess was determined by HPLC with a Chiralcel OD-H column(n-hexane-isopropanol 95:5 V/V, 0.8 mL/min, 210 nm); minor enantiomer  $t_r = 18.693$  min, major enantiomer  $t_r = 17.504$  min; 88% *ee*;  $[\alpha]_D^{18} -28.44^\circ$  (  $c$  1.0,  $\text{CHCl}_3$  ) ; [lit.<sup>[4]</sup>  $[\alpha]_D^{20} +21.9$  (  $c$  3.60 ,  $\text{CHCl}_3$ ), 84% *ee* (R)].  $^1\text{H NMR}$  (400 MHz,  $\text{CDCl}_3$ )  $\delta$  ppm: 7.60-7.4 (td,  $J=1.2, 6.4\text{Hz}$ , 1H) , 7.41-7.46 (m, 1H), 7.22-7.26 (t,  $J= 7.8\text{Hz}$ , 1H), 7.11-7.16(t, 9.2Hz, 1H), 5.77(s, 1H), 3.48(s, 1H);  $^{13}\text{C NMR}$  (100 MHz,  $\text{CDCl}_3$ )  $\delta$  ppm: 161.2, 158.7, 131.8-131.9 (s,  $J_{\text{CF}}=8.2\text{Hz}$ , 1C), 128.4, 124.9-125.0 ( s,  $J_{\text{CF}}=3.7\text{Hz}$ , 1C), 122.8-122. 9 (s,  $J_{\text{CF}}=4.2\text{Hz}$ , 1C), 118, 115.9-116.1 (s,  $J_{\text{CF}}=20.4\text{Hz}$ , 1C), 57.9-58.0 (s,  $J_{\text{CF}}=4.9\text{Hz}$ , 1C);  $^{19}\text{F NMR}$  (470 MHz,  $\text{CDCl}_3$ ): -118.2; **IR (KBr)**: 3405, 2959, 2852, 2362, 1617, 1492, 1459, 1231, 1030, 759.

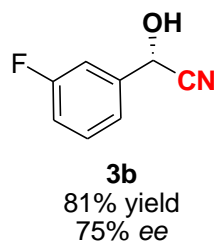

2-Hydroxy-2-(3- Fluorophenyl) acetonitrile (**3b**) (yellow oil) was obtained according to the general procedure (81% yield). Enantiomeric excess was determined by HPLC with a Chiralcel AD-H column(n-hexane-isopropanol 95:5 V/V, 0.8 mL/min, 210 nm); minor enantiomer  $t_r = 21.36$  min, major enantiomer  $t_r = 22.59$  min; 75% *ee* ;  $[\alpha]_D^{18} -20.05^\circ$  (  $c$  1.0,  $\text{CHCl}_3$  ) ;  $^1\text{H NMR}$  (400 MHz,  $\text{CDCl}_3$ )  $\delta$  ppm: 7.11 (dt,  $J = 8.4, 8. 3, 2.2$  Hz, 1H), 7.33-7.18 (m, 1H), 7.40 (dd,  $J = 13.8, 7.9$  Hz, 1H), 5.53 (s, 1H), 3.93 (d,  $J = 2.8$  Hz, 1H);  $^{13}\text{C NMR}$  (100 MHz,  $\text{CDCl}_3$ )  $\delta$  ppm: 164.21 (s, 1C), 161.74 (s, 1C), 137.46 (d,  $J_{\text{CF}} = 7.31$  Hz, 1C), 130.87 (d,  $J_{\text{CF}} = 8.30$  Hz, 1C), 122.14 (d,  $J_{\text{CF}} = 3.03$  Hz,1C), 118.55 (s, 1C), 116.91 (s, 1C), 116.70 (s, 1C), 113.89 (s, 1C), 113.65 (s, 1C), 62.77 (s, 1C);  $^{19}\text{F-NMR}$  (470 MHz,  $\text{CDCl}_3$ )  $\delta$ ppm: -110.9; **IR(KBr)**: 3445, 2968,

2923, 2851, 2061, 1619, 1453, 1265, 1137, 1051, 868, 757

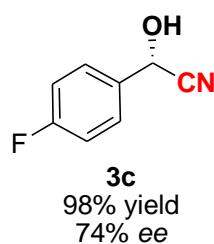

2-Hydroxy-2-(3-Fluorophenyl)acetonitrile (**3c**) (yellow oil) was obtained according to the general procedure (98% yield). Enantiomeric excess was determined by HPLC with a Chiralcel AD-H column(n-hexane-isopropanol 95:5 V/V, 0.8 mL/min, 210 nm); minor enantiomer  $t_r = 20.464$  min, major enantiomer  $t_r = 18.488$  min; 74% *ee*;  $[\alpha]_D^{18} -26.4^\circ$  (  $c$  1.0,  $\text{CHCl}_3$  ); [lit.  $^{[4]}[\alpha]_{20}^D +36.4$  (  $c$  6.4,  $\text{CHCl}_3$  ) for R-enantiomer in 94%*ee*];  $^1\text{H NMR}$  (400 MHz,  $\text{CDCl}_3$ )  $\delta$  ppm: 7.50 ( dd,  $J = 8.4, 5.2$  Hz, 1H ), 7.16-7.06 ( m, 1H ), 5.51 (s, 1H), 3.68 (s, 1H);  $^{13}\text{C NMR}$  (100 MHz,  $\text{CDCl}_3$ )  $\delta$  ppm: 164.7-164.2(d,  $J_{\text{CF}}=48.1\text{Hz}$ , 1C), 131.2-131.1(d,  $J_{\text{CF}}=3.2\text{Hz}$ , 1C), 128.7-128.6 (d,  $J_{\text{CF}}=8.4\text{Hz}$ , 1C), 118.8, 116.3-116.1(d,  $J_{\text{CF}}=21.0\text{Hz}$ , 1C), 62.9;  $^{19}\text{F-NMR}$  (470 MHz,  $\text{CDCl}_3$ )  $\delta$ ppm: -110.9; **IR ( KBr )**: 3430, 2959, 2924, 2853, 2361, 1605, 1510, 1234, 1039, 836, 749.

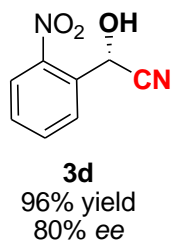

2-Hydroxy-2-(4-Nitrophenyl)acetonitrile (**3d**) was obtained according to the general procedure (96% yield). Enantiomeric excess was determined by HPLC with a Chiralcel AD-H column(n-hexane-isopropanol 95:5 V/V, 0.8 mL/min, 210 nm); minor enantiomer  $t_r = 19.831$  min, major enantiomer  $t_r = 18.258$  min; 80% *ee*;  $[\alpha]_D^{18} -70.4^\circ$  (  $c$  1.0,  $\text{CHCl}_3$  );  $^1\text{H NMR}$  (400 MHz,  $\text{CDCl}_3$ )  $\delta$ ppm: 8.16-8.18(dd,  $J=1, 8\text{Hz}$ , 1H), 7.97-7.99(d,  $J=7.5\text{Hz}$ , 1H), 7.77-7.80(t,  $J=8\text{Hz}$ , 1H), 7.61-7.65(t,  $J=8\text{Hz}$ , 1H), 6.20(s, 1H), 4.15(s, 1H);  $^{13}\text{C NMR}$  (100 MHz,  $\text{CDCl}_3$ )  $\delta$ ppm: 146.9, 134.8, 130.9, 130.8, 129.3, 125.8, 117.6, 60.4; **IR ( KBr )**: 3492, 3399, 3111, 2966, 2934, 2854, 2249, 1524, 1346, 1186, 1040, 786, 741, 704.

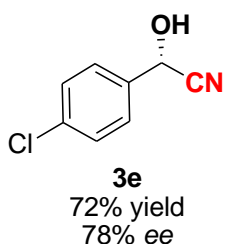

2-Hydroxy-2-(4-Chlorophenyl)acetonitrile (**3e**) (yellow oil) was obtained according to the general procedure (72% yield). Enantiomeric excess was determined by HPLC with a Chiralcel AD-H column(n-hexane-isopropanol 95:5 V/V, 0.8 mL/min, 210 nm); minor enantiomer  $t_r = 13.941$  min, major enantiomer  $t_r = 12.299$  min; 78% *ee*;  $[\alpha]_D^{18} -31.9^\circ$  (  $c$  1.0,  $\text{CHCl}_3$  ); [lit.<sup>[1]</sup>  $[\alpha]_D +27.2$  (  $c$  1.50,  $\text{CHCl}_3$  ) for R enantiomer in 66% *ee*];  $^1\text{H NMR}$  (500 MHz,  $\text{CDCl}_3$ )  $\delta$ ppm: 7.39-7.46 (m , 4 H), 5.29 (s, 1 H), 3.65 (s, 1H);  $^{13}\text{C NMR}$  (100 MHz,  $\text{CDCl}_3$  )  $\delta$ ppm: 133.8 , 131.0 , 129.5, 129.4 , 128.0 , 118.7, 62.8; **IR(KBr)**: 3418, 2957, 2922, 2852, 2361, 2341, 1598, 1409, 1193, 1015, 837..

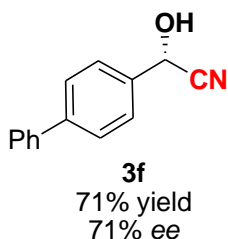

2-Hydroxy-2-(4-phenylphenyl) acetonitrile (**3f**) was obtained according to the general procedure (71% yield). Enantiomeric excess was determined by HPLC with a Chiralcel AD-H column(n-hexane-isopropanol 95:5 V/V, 0.8 mL/min, 210 nm); minor enantiomer  $t_r = 21.36$  min, major enantiomer  $t_r = 22.59$  min; 71% *ee*;  $[\alpha]_D^{18} -25.3^\circ$  (  $c$  1.0,  $\text{CHCl}_3$  );  $^1\text{H NMR}$  (400 MHz , $\text{CDCl}_3$ )  $\delta$ ppm: 7.74-7.76(d,  $J = 8\text{Hz}$ , 2H), 7.67-7.70(m,4H),7.47-7.50(t,  $J=8$  Hz, 2H), 7.38-7.41(t,  $J=7.5\text{Hz}$ , 1Hz), 6.04-6.05(d,  $J=6.4\text{Hz}$ , 1H), 5.84-5.86(d,  $J=6\text{Hz}$ , 1H);  $^{13}\text{C NMR}$  (100 MHz,  $\text{CDCl}_3$  )  $\delta$ ppm: 147.6, 145.4, 141.5, 134.1, 132.7, 132.5, 132.3, 132.2, 125.0, 67.6; **IR(KBr)**: 3413, 2963, 2922, 2852, 2239, 1487, 1409, 1273, 1193, 1027, 762.

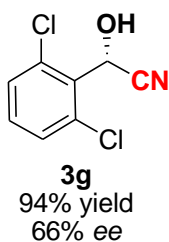

2-Hydroxy-2-(2,6-diChlorophenyl) acetonitrile (**3g**) (yellow solid) was obtained

according to the general procedure (94% yield). Enantiomeric excess was determined by HPLC with a Chiralcel AD-H column(n-hexane-isopropanol 95:5 V/V, 0.8 mL/min, 210 nm); minor enantiomer tr = 13.97 min, major enantiomer tr = 16.577 min; 66% *ee*;  $[\alpha]_{\text{D}}^{18} -53.4^{\circ}$  (c 0.8, CHCl<sub>3</sub>);  $^1\text{H NMR}$  (400 MHz, CDCl<sub>3</sub>)  $\delta$  ppm: 7.27-7.39 (m, 3 H), 6.29 (s, 1 H), 3.64 (s, 1 H);  $^{13}\text{C NMR}$  (100 MHz, CDCl<sub>3</sub>)  $\delta$  ppm :135.1 , 131.6 , 129.4, 117.1, 59.1 ; **IR (KBr)**: 3374, 3078, 2934, 2252, 1738, 1560, 1426, 1189, 1035, 861, 744, 664.

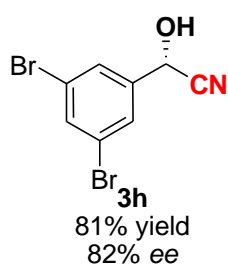

2-Hydroxy-2-(3,5-diBromophenyl)acetonitrile (**3h**) (yellow solid) was obtained according to the general procedure (81% yield). Enantiomeric excess was determined by HPLC with a Chiralcel AD-H column(n-hexane-isopropanol 95:5 V/V, 0.8 mL/min, 210 nm); minor enantiomer tr = 21.36 min, major enantiomer tr = 22.59 min; 82% *ee*.  $[\alpha]_{\text{D}}^{18} -15.3^{\circ}$  (c 1.0, CHCl<sub>3</sub>);  $^1\text{H NMR}$  (400 MHz, CDCl<sub>3</sub>)  $\delta$ ppm:7.71 (s, 1 H), 7.60 (s, 2 H), 5.50 (s, 1 H), 4.10 (s, 1 H);  $^{13}\text{C NMR}$  (100 MHz, CDCl<sub>3</sub>)  $\delta$  ppm 138.7 , 135.4 , 128.3, 123.6 , 118.1 , 61.9. **IR (KBr)**: 3388, 3085, 2928, 2852, 2685, 2255, 1564, 1438, 1045, 936, 784, 732, 603.

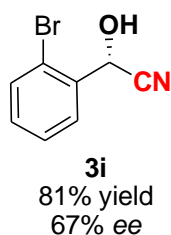

2-Hydroxy-2-(2-Bromophenyl) acetonitrile (**3i**) (yellow oil) was obtained according to the general procedure (81% yield). Enantiomeric excess was determined by HPLC with a Chiralcel OD-H column(n-hexane-isopropanol 95:5 V/V, 1 mL/min, 210 nm); minor enantiomer tr = 13.654 min, major enantiomer tr = 12.608 min; 67% *ee*;  $[\alpha]_{\text{D}}^{18} 8.4^{\circ}$  (c 1.0, CHCl<sub>3</sub>);  $^1\text{H NMR}$  (400 MHz, CDCl<sub>3</sub>)  $\delta$  ppm 7.72 (d, J = 7.74 Hz, 1H), 7.61 (d, J = 7.99 Hz, 1H), 7.42 (t, J = 7.58 Hz, 1H), 7.29 (t, J = 7.70 Hz, 1H), 5.83 (s,

1H), 3.76 (s, 1H); <sup>13</sup>C NMR (100 MHz, CDCl<sub>3</sub>) δ ppm: 134.45, 133.37, 131.31, 128.60, 128.33, 122.35, 118.05, 63.12; IR (KBr): 3389, 3058, 2913, 2805, 2249, 1591, 1571, 1243, 1031, 750, 637, 608.

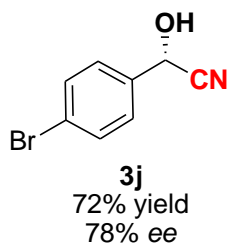

2-Hydroxy-2-(2-diBromophenyl) acetonitrile (**3j**) was obtained according to the general procedure (72% yield). Enantiomeric excess was determined by HPLC with a Chiralcel AD-H column(n-hexane-isopropanol 95:5 V/V, 0.8 mL/min, 210 nm); minor enantiomer tr = 15.197 min, major enantiomer tr = 12.888 min; 78% ee.  $[\alpha]_{\text{D}}^{18} -21.2^{\circ}$  (c 1.0, CHCl<sub>3</sub>); <sup>1</sup>H NMR (400 MHz, CDCl<sub>3</sub>) δ ppm: 7.56 (d, J = 8.35 Hz, 1H), 7.37 (d, J = 8.32 Hz, 1H), 5.49 (s, 1H), 4.42-3.14 (m, 1H); <sup>13</sup>C NMR (100 MHz, CDCl<sub>3</sub>) δ ppm: 134.2, 132.4, 128.2, 124.1, 118.6, 62.9; IR (KBr):3391, 1958, 2923, 2852, 2254, 1697, 1592, 1491, 1404, 1038, 841, 797, 615.

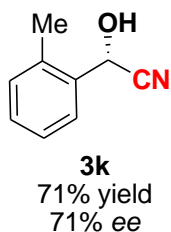

2-Hydroxy-2-(2-Methylphenyl)acetonitrile (**3k**) (yellow oil) was obtained according to the general procedure (71% yield). Enantiomeric excess was determined by HPLC with a Chiralcel AD-H column(n-hexane-isopropanol 95:5 V/V, 0.8 mL/min, 210 nm); minor enantiomer tr = 12.868 min, major enantiomer tr = 11.066 min; 71% ee.  $[\alpha]_{\text{D}}^{18} -11.8^{\circ}$  (c1.0, CHCl<sub>3</sub>); lit.<sup>[1]</sup>  $[\alpha]_{\text{D}}+21.3$  (c1.03, CHCl<sub>3</sub>), 51% ee (R). <sup>1</sup>H NMR (400 MHz, CDCl<sub>3</sub>) δ ppm: 7.22-7.32 (m, 4 H), 5.46 (s, 1 H), 3.60 (s, 1 H), 2.39 (s, 3 H); <sup>13</sup>C NMR (100 MHz,CDCl<sub>3</sub>) δ ppm :139.2, 135.2, 130.6, 129.0, 127.4, 123.7, 119.1, 63.5, 21.3; IR (KBr): 3412, 2957, 2924, 2853, 2247, 1692, 1600, 1491, 1462, 1038, 753.

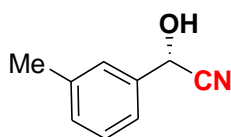

**3l**  
71% yield  
78% ee

2-Hydroxy-2-(3-Methylphenyl) acetonitrile (**3l**) (yellow oil) was obtained according to the general procedure (71% yield). Enantiomeric excess was determined by HPLC with a Chiralcel AD-H column(n-hexane-isopropanol 95:5 V/V, 0.8 mL/min, 210 nm); minor enantiomer tr = 13.093 min, major enantiomer tr = 11.292 min; 78% ee.  $[\alpha]_{\text{D}}^{18}$   $-14.1^{\circ}$  (c 1.0, CHCl<sub>3</sub>); lit.<sup>[1]</sup> $[\alpha]_{\text{D}}^{+41.2}$ (c 2.29, CHCl<sub>3</sub>), 91% ee (R). **<sup>1</sup>H NMR** (400 MHz, CDCl<sub>3</sub>) δ ppm: 7.22-7.33 (m, 4 H), 5.47 (s, 1 H), 3.49 (s, 1 H), 2.39 (s, 3 H); **<sup>13</sup>C NMR** (100 MHz, CDCl<sub>3</sub>) δ ppm: 139.2, 135.3, 130.6, 129.1, 127.3, 123.7, 119.0, 63.58, 21.32; **IR (KBr)**: 3325, 2957, 2923, 2853, 2249, 1694, 1609, 1461, 1156, 1038, 793, 747, 700.

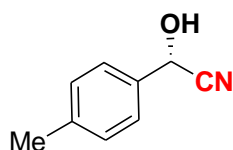

**3m**  
72% yield  
75% ee

2-Hydroxy-2-(4-Methylphenyl) acetonitrile (**3m**) (yellow oil) was obtained according to the general procedure (72% yield). Enantiomeric excess was determined by HPLC with a Chiralcel AD-H column(n-hexane-isopropanol 95:5 V/V, 0.8 mL/min, 210 nm); minor enantiomer tr = 14.196 min, major enantiomer tr = 12.746 min; 75% ee.  $[\alpha]_{\text{D}}^{18}$   $-12.3^{\circ}$  (c 1.0, CHCl<sub>3</sub>); lit.<sup>[1]</sup> $[\alpha]_{\text{D}}^{+47.4}$ (c 1.61, CHCl<sub>3</sub>), 92% ee (R). **<sup>1</sup>H NMR** (400 MHz, CDCl<sub>3</sub>)δ ppm: 7.40 (d, J = 7.9 Hz, 2H), 7.24 (d, J = 7.9 Hz, 2H), 5.47 (s, 1H), 3.42 (s, 1H), 2.38 (s, 3 H); **<sup>13</sup>C NMR** (100 MHz, CDCl<sub>3</sub>) δ ppm: 139.9, 132.6, 129.8, 126.7, 119.1, 63.4, 21.2; **IR (KBr)**: 3419, 2956, 2923, 2854, 2248, 1681, 1514, 1260, 1037, 929, 814, 762, 606, 528.

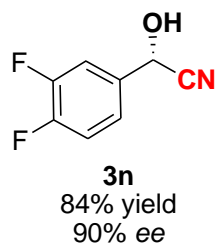

2-Hydroxy-2-(3,4-difluorophenyl)acetonitrile (**3n**) (yellow oil) was obtained according to the general procedure (84% yield). Enantiomeric excess was determined by HPLC with a Chiralcel AS-H column(n-hexane-isopropanol (97:3V/V, 0.8 mL/min, 210 nm); minor enantiomer tr = 21.36 min, major enantiomer tr = 33.22 min; 90% ee.  $[\alpha]_D^{18}$   $-25.6^\circ$  (c 1.0, CHCl<sub>3</sub>); <sup>1</sup>H NMR (400 MHz, CDCl<sub>3</sub>) δ ppm: 7.34 (dd, J = 13.47, 5.31 Hz, 1H), 7.23 (m, 2H), 5.51 (s, 1H), 4.04 (s, 1H); <sup>13</sup>C NMR (100 MHz, CDCl<sub>3</sub>) δ ppm: 151.7-152.4 (d, J<sub>CF</sub>=14.8, 55Hz, 1C), 149.2 -149.9 (d, J<sub>CF</sub>=14.8, 55Hz, 1C), 132-132.1 (t, J<sub>CF</sub>=4.9Hz, 1C), 122.8-122.9 (t, J<sub>CF</sub>= 8.4Hz, 1C) 118.0-118.4 (d, J<sub>CF</sub>=16.6, 23.2Hz, 1C), 155.9-116.1 (d, J<sub>CF</sub>=2, 17.6Hz, 1C), 62.3 (s, 1C); <sup>19</sup>F NMR (470 MHz, CDCl<sub>3</sub>) δ ppm: -135.18, -135.22, -135.32, -135.37; IR (KBr): 3417, 2957, 2924, 2854, 2253, 1707, 1616, 1521, 1437, 1289, 1119, 875, 825, 772.

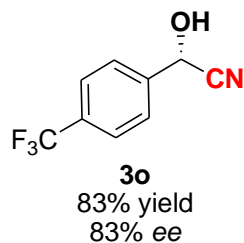

2-hydroxy-2-(4-(trifluoromethyl)phenyl)acetonitrile (**3o**) (yellow oil) was obtained according to the general procedure (83% yield). Enantiomeric excess was determined by HPLC with a Chiralcel AD-H column(n-hexane-isopropanol 95:5 V/V, 0.8 mL/min, 210 nm); minor enantiomer tr = 21.36 min, major enantiomer tr = 22.59 min; 83% ee.  $[\alpha]_D^{18}$   $-23.9^\circ$  (c 1.0, CHCl<sub>3</sub>); lit.<sup>[1]</sup>  $[\alpha]_D^{19}$  +19.0 (c1.76, CHCl<sub>3</sub>), 80% ee (R). <sup>1</sup>H NMR (400 MHz, CDCl<sub>3</sub>) δ ppm: 7.68-7.70 (d, J=8.4Hz, 2 H), 7.61-7.63 (d, J=8.4Hz, 2H), 5.61 (s, 1 H), 4.02 (s, 1H); <sup>13</sup>C NMR (100 MHz, CDCl<sub>3</sub>) δ ppm: 138.7, 126.9, 126.2, 126.1, 118.5, 62.8; <sup>19</sup>F NMR (470 MHz, CDCl<sub>3</sub>) δ ppm: -62.90; IR (KBr): 3407, 2926, 2854, 2644, 2254, 1928, 1703, 1422, 1327, 1113, 850, 606.



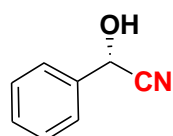

**3p**  
65% yield  
71% ee

2-Hydroxy-phenylacetonitrile (**3p**) was obtained according to the general procedure (65% yield). Enantiomeric excess was determined by HPLC with a Chiralcel OD-H column (n-hexane-isopropanol 95:5 V/V, 0.8 mL/min, 210 nm); minor enantiomer tr = 23.449 min, major enantiomer tr = 21.826 min; 71% ee.  $[\alpha]_{\text{D}}^{18} -27.3^{\circ}$  (c 1.0, CHCl<sub>3</sub>); lit.<sup>[3]</sup>  $[\alpha]_{\text{D}}^{24} +36.8$  (c 2.0, CHCl<sub>3</sub>), 85% ee (R). <sup>1</sup>H NMR (400 MHz, CDCl<sub>3</sub>) δ ppm: 7.42-7.52(m, 5H), 5.51(s, 1H), 3.59 (s, 1H); <sup>13</sup>C NMR (100 MHz, CDCl<sub>3</sub>) δ ppm: 135.2, 129.8, 129.2, 126.7, 118.9, 63.6; IR(KBr): 3425, 3064, 2928, 2852, 1485, 1275, 1260, 1192, 1040, 932, 749, 697.

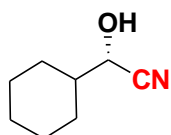

**3q**  
83% yield

2-cyclohexyl-2-hydroxyacetonitrile (**3q**) was obtained according to the general procedure (83% yield).  $[\alpha]_{\text{D}}^{21} -7.3^{\circ}$  (c 1.0, CHCl<sub>3</sub>); lit.<sup>[3]</sup>  $[\alpha]_{\text{D}}^{24} +6.1$  (c = 3.80, CHCl<sub>3</sub>) for R enantiomer in 65% ee; <sup>1</sup>H NMR (400 MHz, CDCl<sub>3</sub>) δ ppm: 4.24-4.25(d, J=6Hz, 1H), 3.59(s, 1H), 1.68-1.89(m, 6H), 1.10-1.28(m, 5H); <sup>13</sup>C NMR (100 MHz, CDCl<sub>3</sub>) δ ppm: 119.5, 42.2, 28.2, 27.9, 25.9, 25.5, 25.4. IR(KBr): 3448, 2931, 2856, 1636, 1451, 1265, 1043, 747, 704.

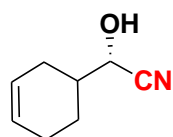

**3r**  
92% yield

2-(cyclohex-3-enyl)-2-hydroxyacetonitrile (**3r**) was obtained according to the general procedure (92% yield).  $[\alpha]_{\text{D}}^{21} -4.7^{\circ}$  (c 1.0, CHCl<sub>3</sub>); <sup>1</sup>H NMR (400 MHz, CDCl<sub>3</sub>) δ ppm: 5.64-5.72(dd, J=20.4, 11.6Hz, 2H), 4.34-4.36(dd, J=2.8, 6.8Hz, 1H), 3.41(s, 1H), 1.93-2.26(m, 6H), 1.24(s, 1H); <sup>13</sup>C NMR (100 MHz, CDCl<sub>3</sub>) δ ppm: 127.1,

124.7, 119.4, 38.4, 38.3, 26.7, 26.7, 24.3, 23.9, 23.8. **IR(KBr)**: 3446, 3029, 2920, 2847, 2245, 2092, 1652, 1438, 1266, 1084, 1054, 741, 657.

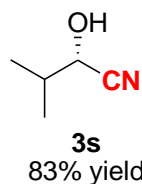

2-hydroxy-3-methylbutanenitrile(**3s**)was obtained according to the general procedure (83% yield).  $[\alpha]_D^{21} -5.3^\circ$ (c1.0,CHCl<sub>3</sub>);lit.<sup>[5]</sup> $[\alpha]_D^{19} -15.4$ ( c=2.1,CHCl<sub>3</sub>) ,90%ee,(S)-isomer]; <sup>1</sup>H NMR (400 MHz, CDCl<sub>3</sub>) δ ppm: 4.26-4.28(d, J=6Hz, 1H), 3.02(s, 1H), 1.24(s, 1H), 1.05-1.10(m, 6H); <sup>13</sup>C NMR (100 MHz, CDCl<sub>3</sub>) δ ppm:119.2, 67.0, 33.1, 17.7, 17.2.**IR(KBr)**: 3432, 2964, 2917, 2849, 2248, 1651, 1470, 1275, 1260, 1064, 971, 763, 749.

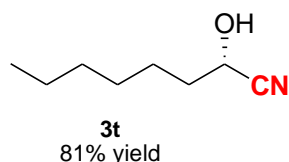

2-hydroxyoctanenitrile(**3t**)was obtained according to the general procedure (81% yield).  $[\alpha]_D^{21} -6.1^\circ$  ( c 1.0, CHCl<sub>3</sub>);lit.<sup>[2]</sup> $[\alpha]_D^{26} +9.1$  ( c 2.82 , CHCl<sub>3</sub>), 66% ee (R). <sup>1</sup>H NMR (400 MHz, CDCl<sub>3</sub>) δ ppm: 4.43-4.47(t, J=6.8Hz, 1H), 3.42(s, 1H), 1.80-1.85(dd, J=6.8Hz, 15.2Hz, 2H), 1.44-1.51(td, J=6.8, 11Hz, 2H), 1.24-1.37(m, 6H), 0.86-0.90(t, J=6.4Hz, 3H);<sup>13</sup>C NMR (300 MHz,CDCl<sub>3</sub>) δ ppm:120.2, 61.3, 35.1, 31.5, 26.6, 24.5, 22.5, 14.0; **IR(KBr)**: 3448, 2956, 2928, 2829, 2359, 1635, 1457, 1275, 1261, 1070, 748.

### Refereces:

[1] B. R. Matthews, W. R. Jackson, G. S. Jayatilake, C. Wilshire, H. A. Jacobs, Aust. J. Chem. 1988, 41, 1697–1709.

[2] H. Nitta, D. Yu, M. Kudo, A. Mori, S. Inoue, J. Am. Chem. Soc. 1992, 114, 7969–7975.

[3] M. Hayashi, Y. Miyamoto, T. Inoue, M. Oguni, J. Org. Chem. 1993,

58, 1515–1522.

[4] S. Han, P. Chen, G. Lin, H. Huang, Z. Li, *Tetrahedron: Asymmetry* 2001, 12, 843–846.

[5] Y. Hamashima, D. Sawada, M. Kanai, M. Shibasaki, *J. Am. Chem. Soc.* 1999, 121, 2641 - 2642.

**Table S1.** Screening of solvents in the Salen-Mn catalyzed cyanosilylation reaction of aldehyde **1a**

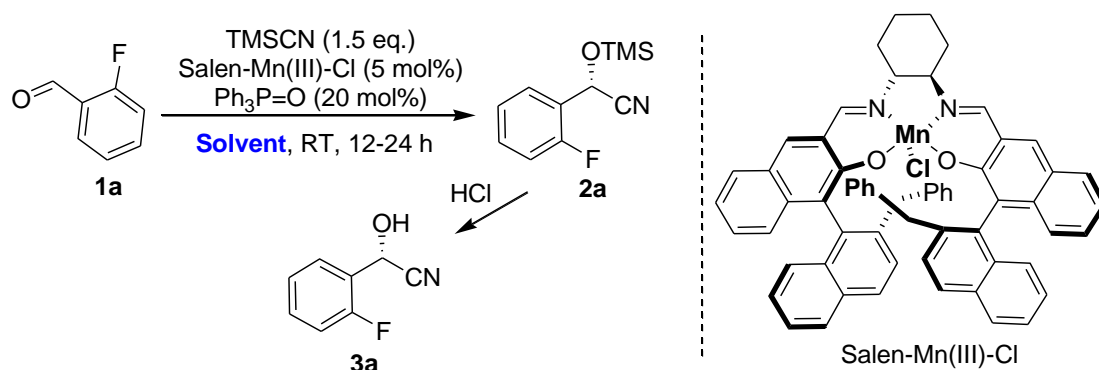

| Entry | Solvent            | Time (h) | Yield (%) | <i>Ee</i> (%) |
|-------|--------------------|----------|-----------|---------------|
| 1     | DCM                | 12       | 90        | 64            |
| 2     | Toluene            | 12       | 54        | 30            |
| 3     | THF                | 12       | 69        | 44            |
| 4     | Et <sub>2</sub> O  | 12       | 49        | 23            |
| 5     | CH <sub>3</sub> CN | 12       | 56        | 11            |
| 6     | EtOH               | 12       | 54        | 6             |
| 7     | 1,4-dioxane        | 12       | 56        | 6             |
| 8     | PhCF <sub>3</sub>  | 12       | 82        | 45            |
| 9     | CHCl <sub>3</sub>  | 12       | 41        | 38            |
| 10    | Xylene             | 12       | 81        | 36            |
| 11    | DCE                | 24       | 91        | 79            |
| 12    | PhCl               | 24       | 89        | 60            |

|           |                                 |    |    |    |
|-----------|---------------------------------|----|----|----|
| <b>13</b> | PhBr                            | 24 | 86 | 59 |
| <b>14</b> | CH <sub>2</sub> Br <sub>2</sub> | 24 | 71 | 52 |
| <b>15</b> | <i>i</i> -PrOH                  | 24 | 51 | -7 |

**Table S2.** The effect of temperature on the Salen-Mn catalyzed cyanosilylation reaction of aldehyde **1a**

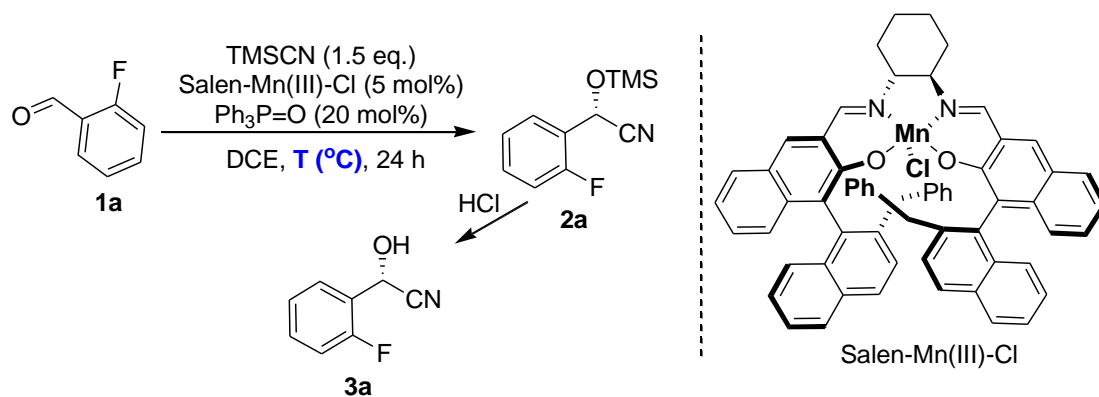

| Entry | Temperature (°C) | Yield (%) | <i>Ee</i> (%) |
|-------|------------------|-----------|---------------|
| 1     | 20               | 91        | 79            |
| 2     | 0                | 92        | 83            |
| 3     | -5               | 90        | 82            |
| 4     | -10              | 94        | 88            |
| 5     | -20              | 82        | 67            |
| 6     | -30              | 33        | 56            |

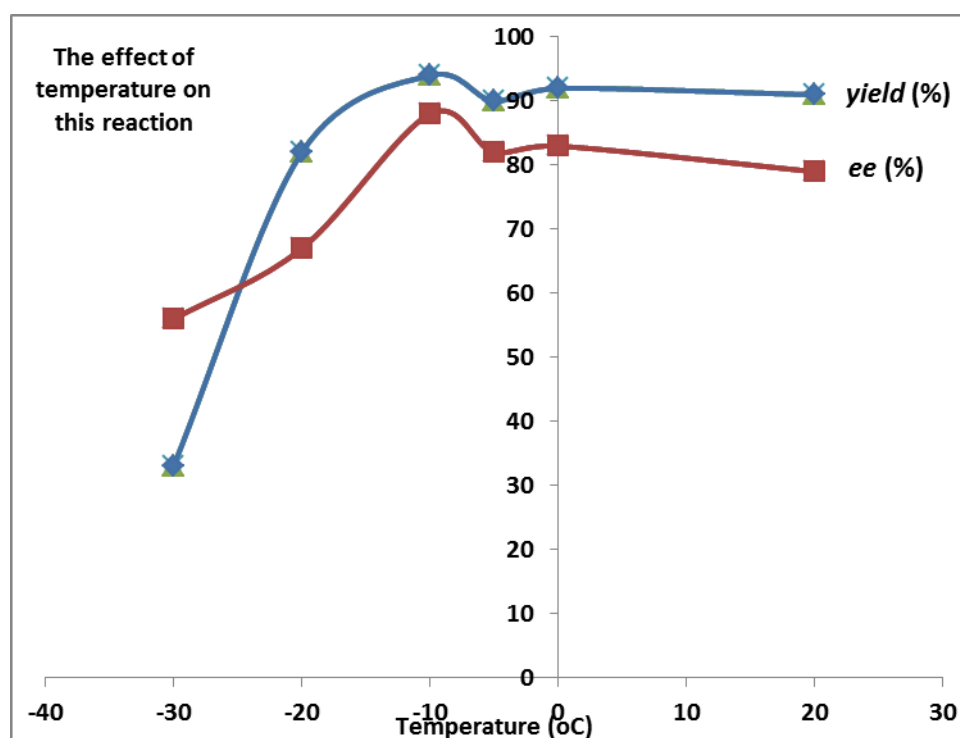

**Table S3.** The effect of phosphine oxide on the Salen-Mn catalyzed cyanosilylation reaction of aldehyde **1a**<sup>[a]</sup>

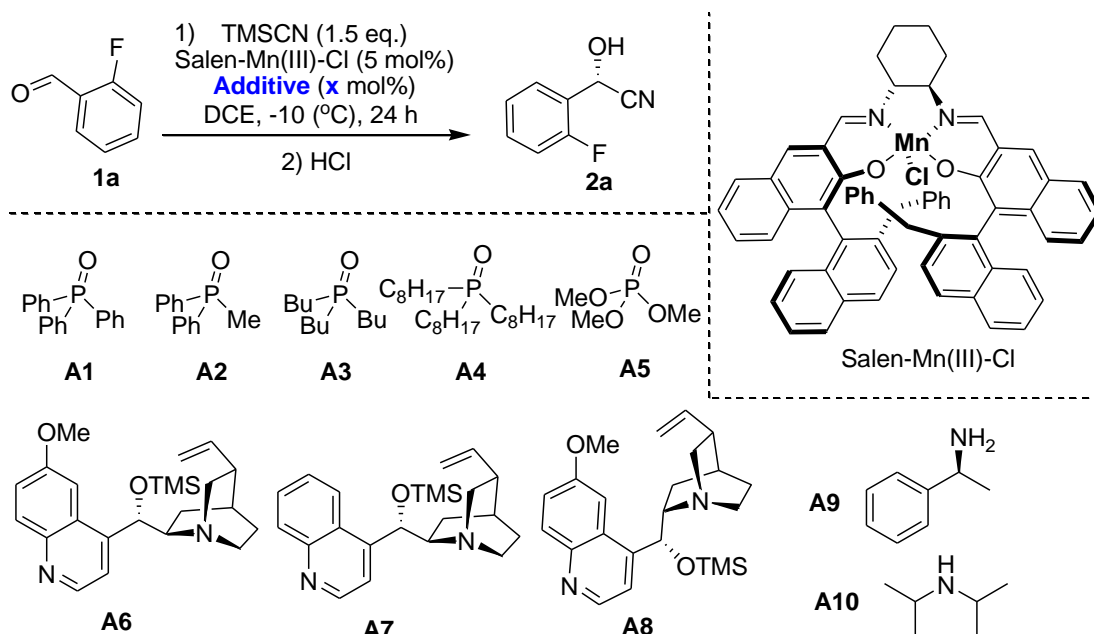

| Entry | Additive (x mol%)                      | Yield (%) <sup>[b]</sup> | <i>Ee</i> (%) <sup>[c]</sup> |
|-------|----------------------------------------|--------------------------|------------------------------|
| 1     | A1 (10)                                | 90                       | 85                           |
| 2     | A1 (20)                                | 94                       | 88                           |
| 3     | A1 (30)                                | 95                       | 86                           |
| 4     | A1 (40)                                | 61                       | 68                           |
| 5     | A1 (50)                                | 95                       | 85                           |
| 6     | A1 (75)                                | 90                       | 84                           |
| 7     | A1 (100)                               | 78                       | 80                           |
| 8     | A2 (20)                                | 61                       | 72                           |
| 9     | A3 (20)                                | 71                       | 71                           |
| 10    | A4 (20)                                | 73                       | 74                           |
| 11    | A5 (20)                                | 79                       | 73                           |
| 12    | AgF (10) <sup>[c]</sup>                | <5                       | -                            |
| 13    | AgSbF <sub>6</sub> (10) <sup>[c]</sup> | <5                       | -                            |
| 14    | AgClO <sub>4</sub> (10) <sup>[c]</sup> | <5                       | -                            |
| 15    | AgOTf (10) <sup>[c]</sup>              | <5                       | -                            |

|           |                                                      |     |    |
|-----------|------------------------------------------------------|-----|----|
| <b>16</b> | <b>A6 (10)<sup>[c]</sup></b>                         | 73  | 67 |
| <b>17</b> | <b>A7 (10)<sup>[c]</sup></b>                         | 71  | 67 |
| <b>18</b> | <b>A8 (10)<sup>[c]</sup></b>                         | 70  | 64 |
| <b>19</b> | <b>A9 (10)<sup>[c]</sup></b>                         | <20 | 50 |
| <b>20</b> | <b>A10 (10)<sup>[c]</sup></b>                        | <20 | 65 |
| <b>21</b> | <b>DMAP (10)<sup>[c]</sup></b>                       | <20 | 32 |
| <b>22</b> | <b>DIPEA (10)<sup>[c]</sup></b>                      | <20 | 51 |
| <b>23</b> | <b>H<sub>2</sub>O<sub>2</sub> (10)<sup>[c]</sup></b> | <20 | 36 |
| <b>24</b> | <b>PhIO (5)<sup>[c]</sup></b>                        | 40  | 32 |
| <b>25</b> | <b>NFSI (10)<sup>[c]</sup></b>                       | <10 | 72 |
| <b>26</b> | <b>Selectfluor (10)<sup>[c]</sup></b>                | <10 | 76 |

[c] Entries 12-26, except the second additive, the use of 20 mol% of triphenylphosphine oxide was also necessary.



## S-5. NMR Charts of Salen ligands and products

Salen 1c-A

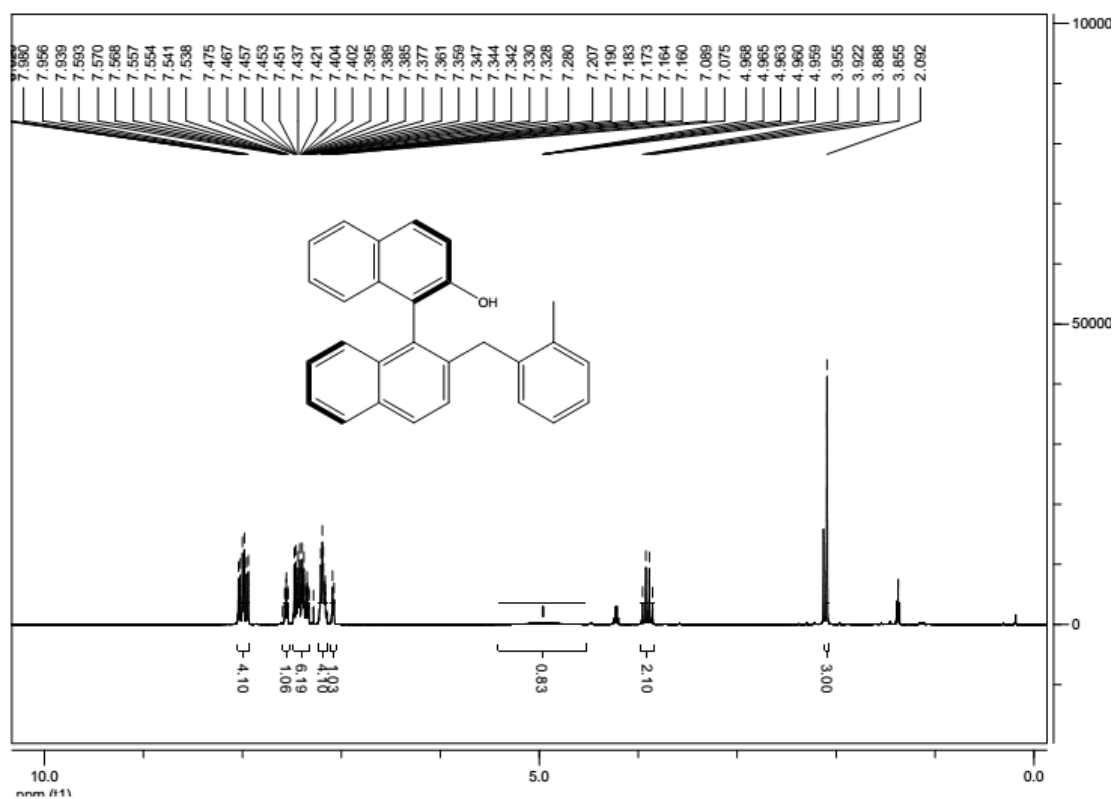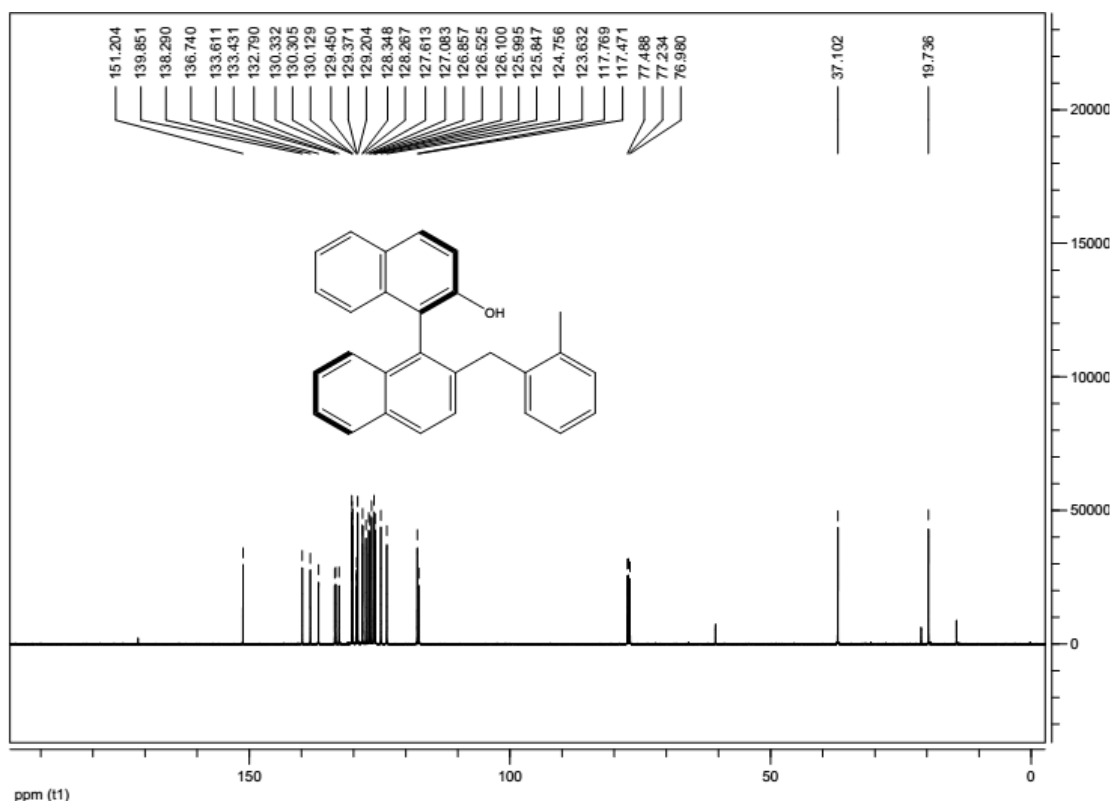

Salen 1c-B

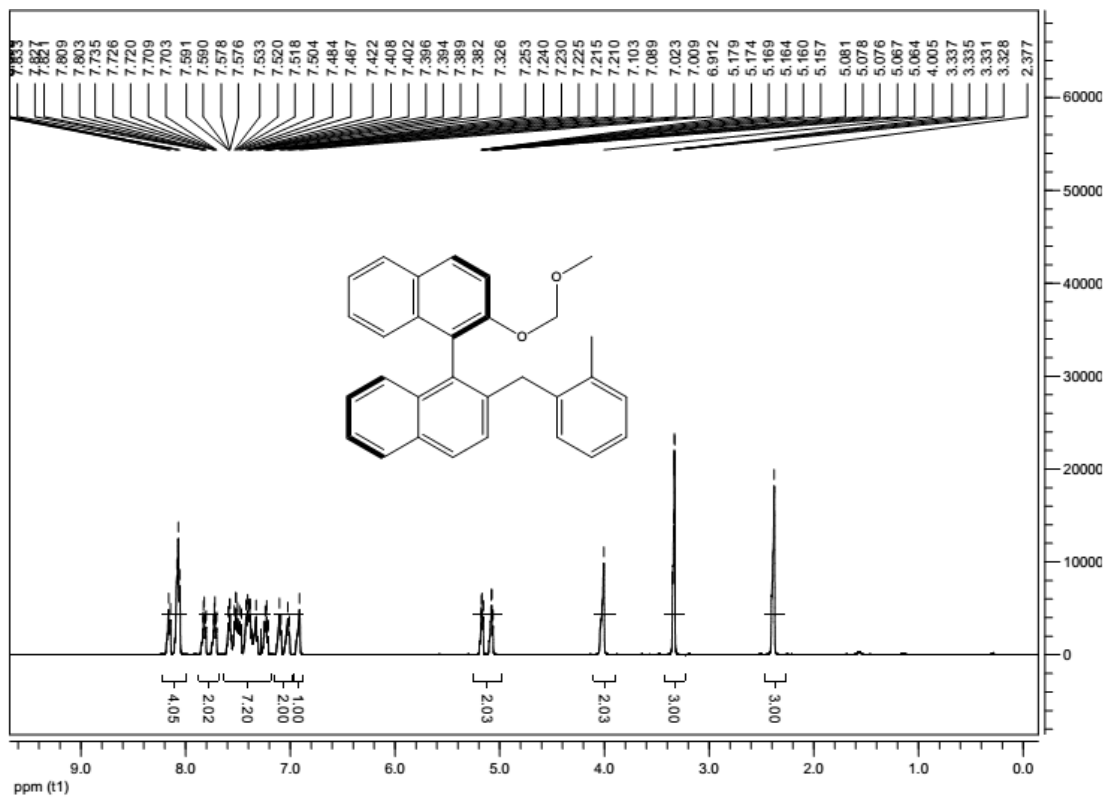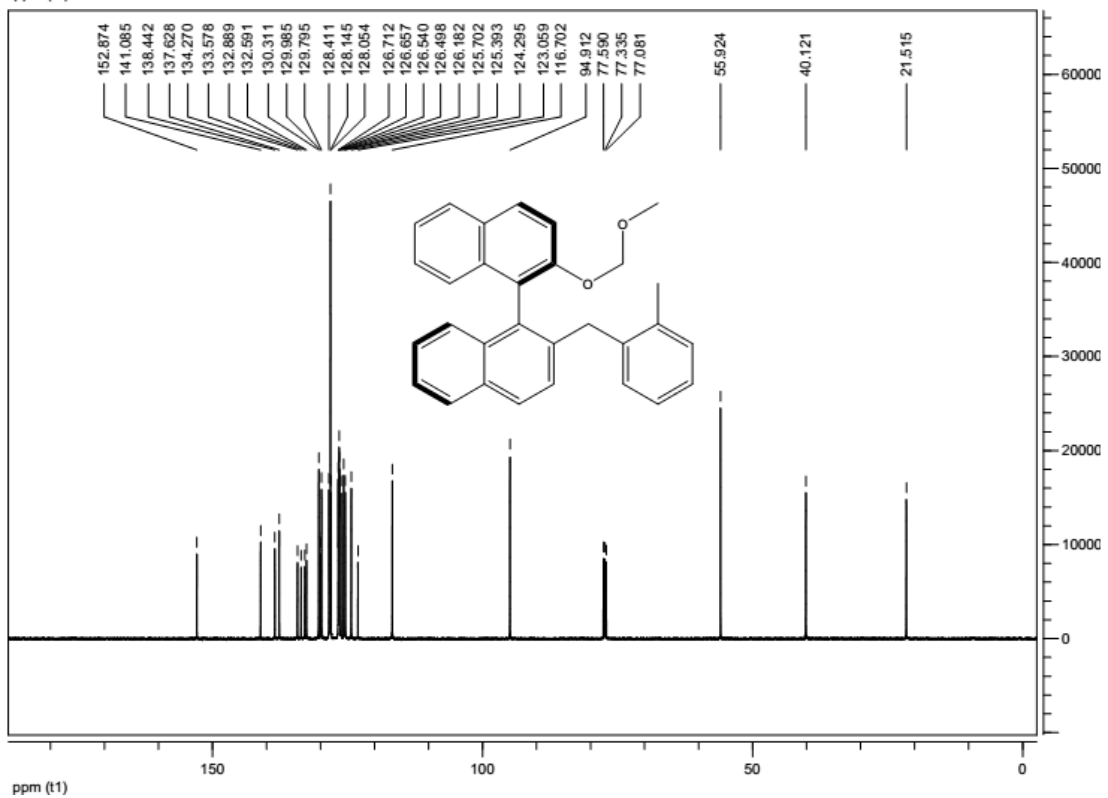

Salen 1c-C:

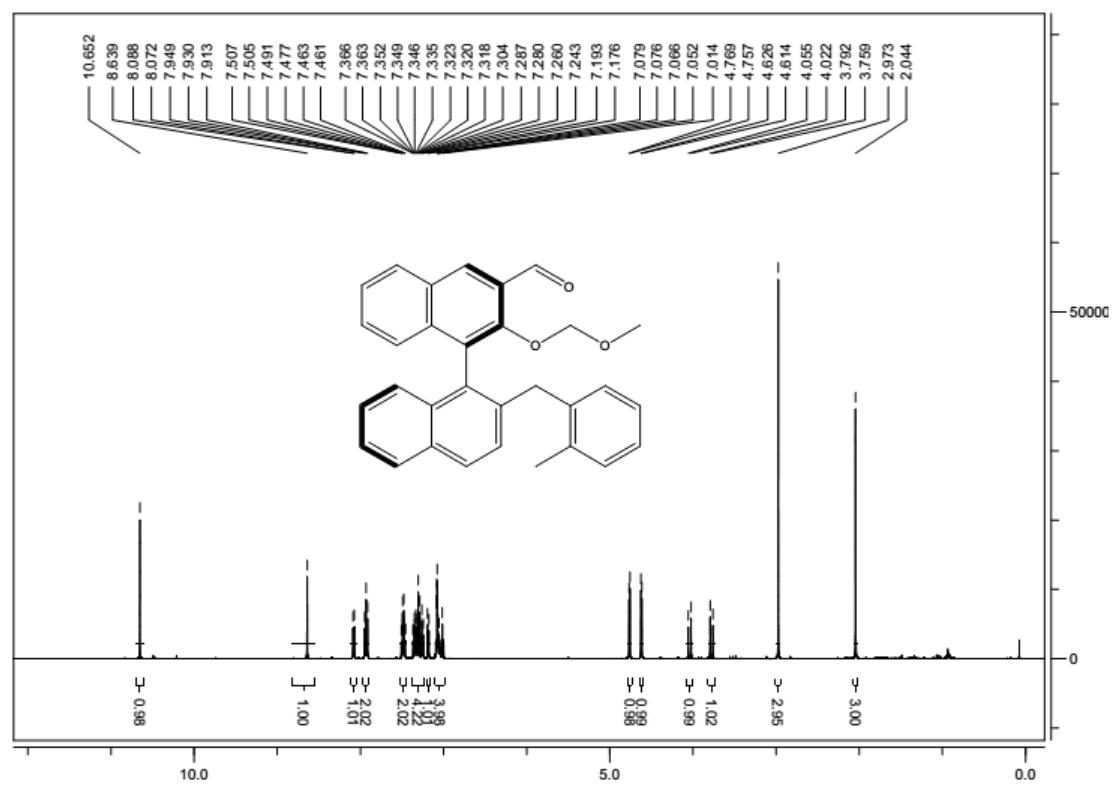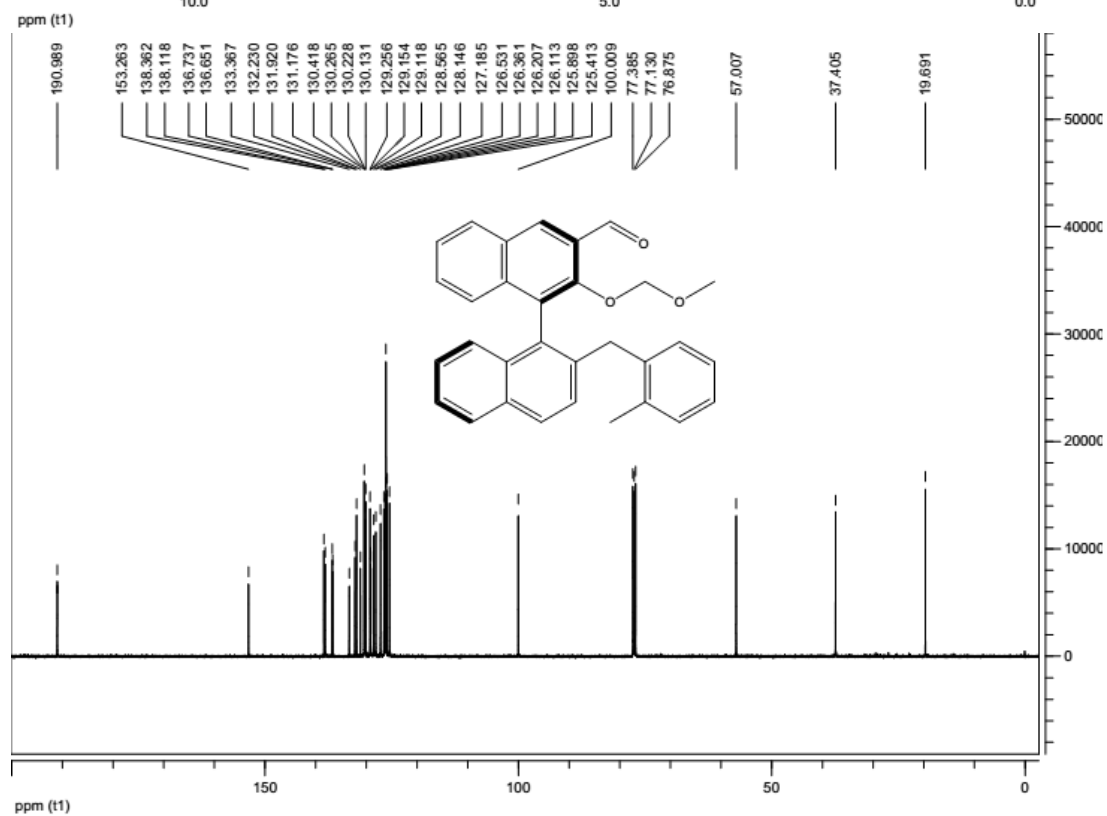

Salen 1c-D:

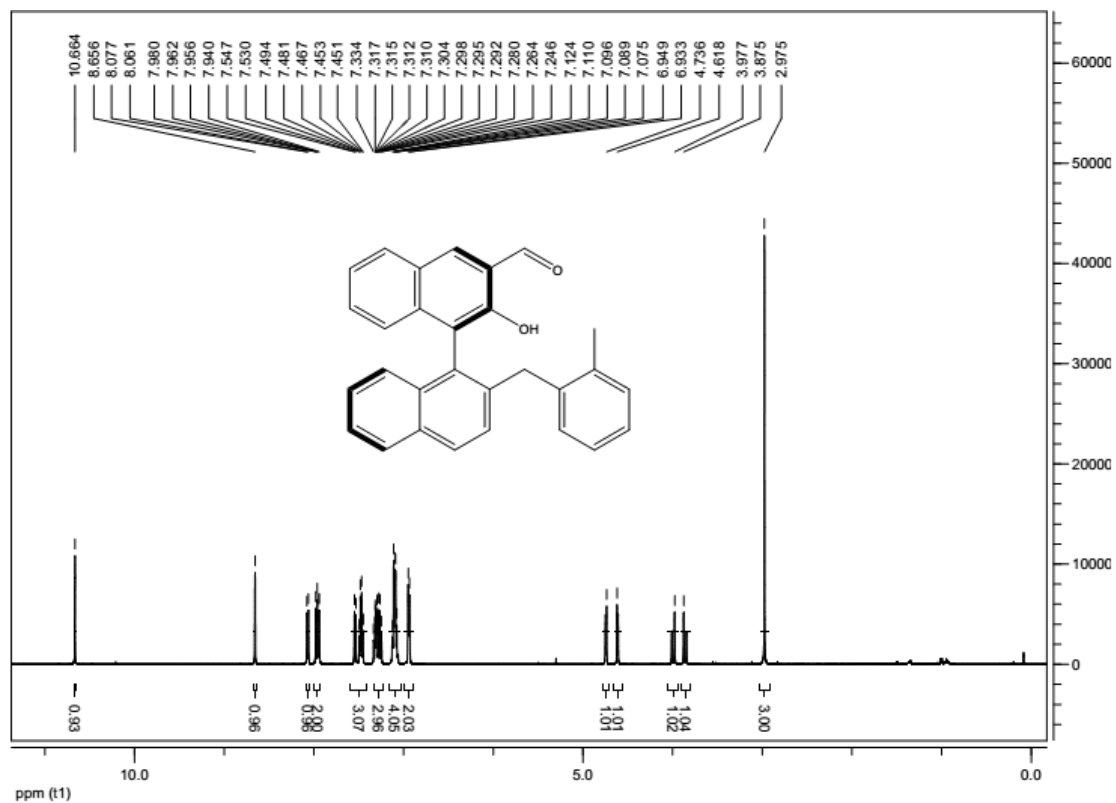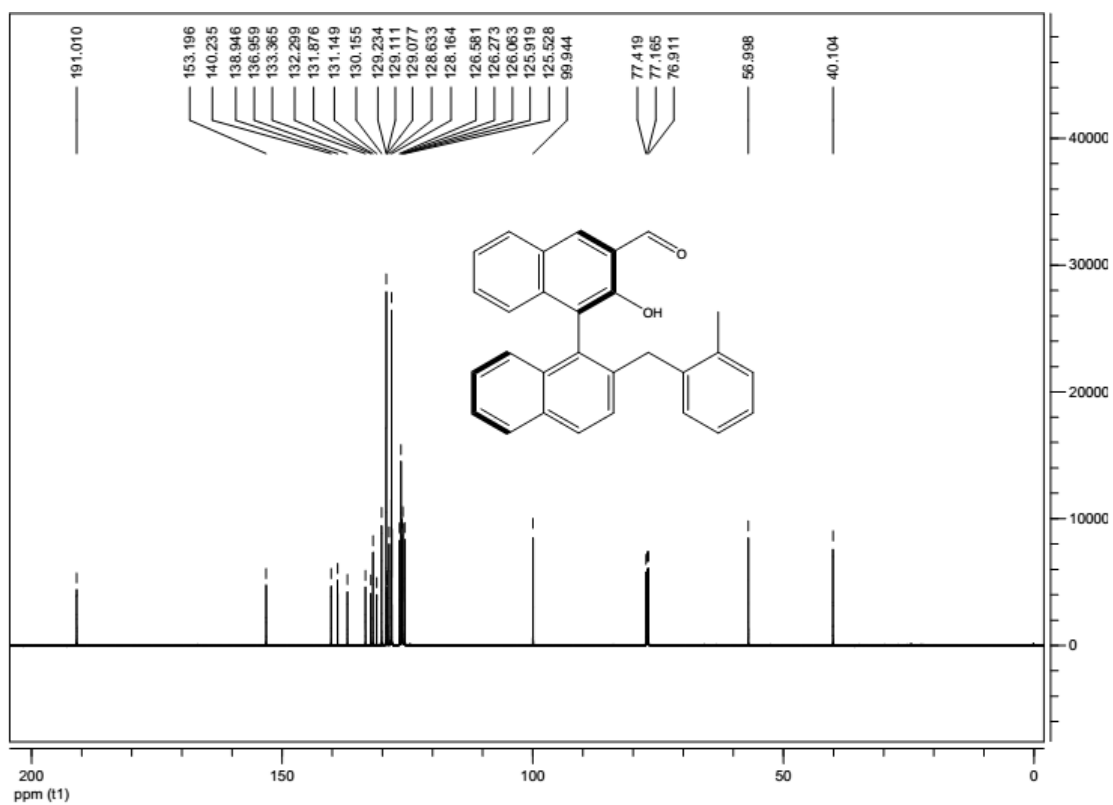

Salen 1c

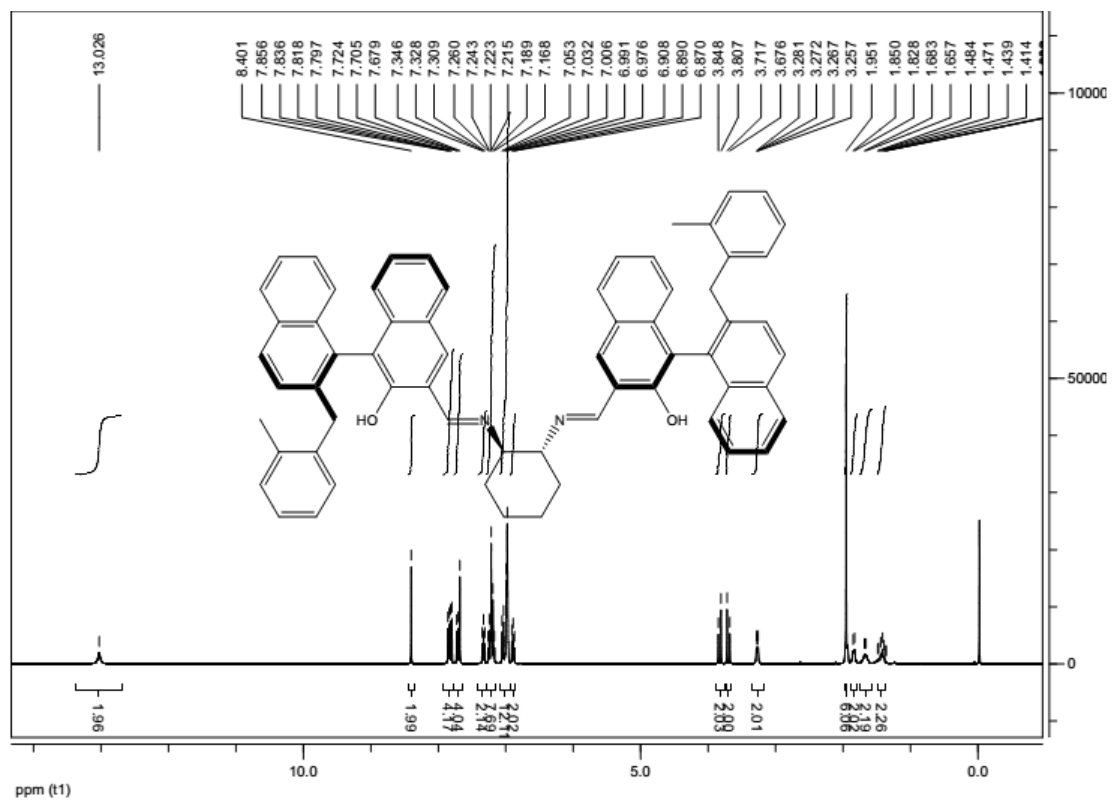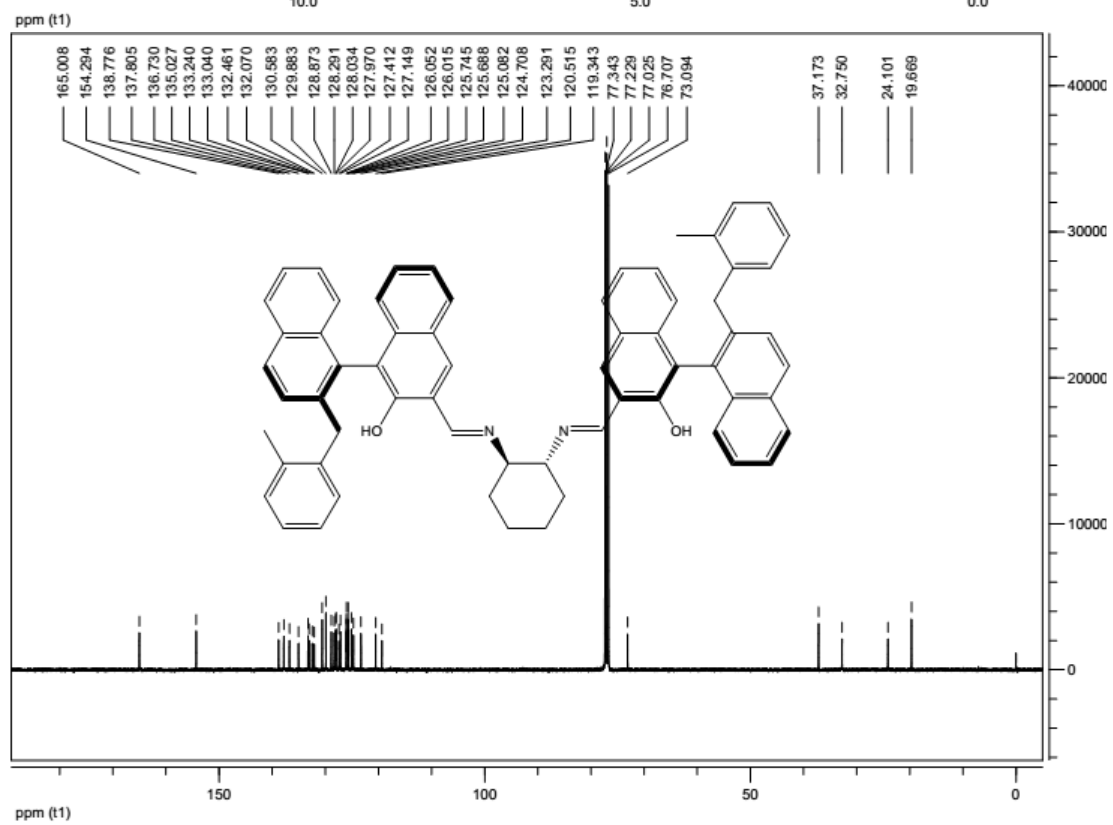

Salen 1d-A:

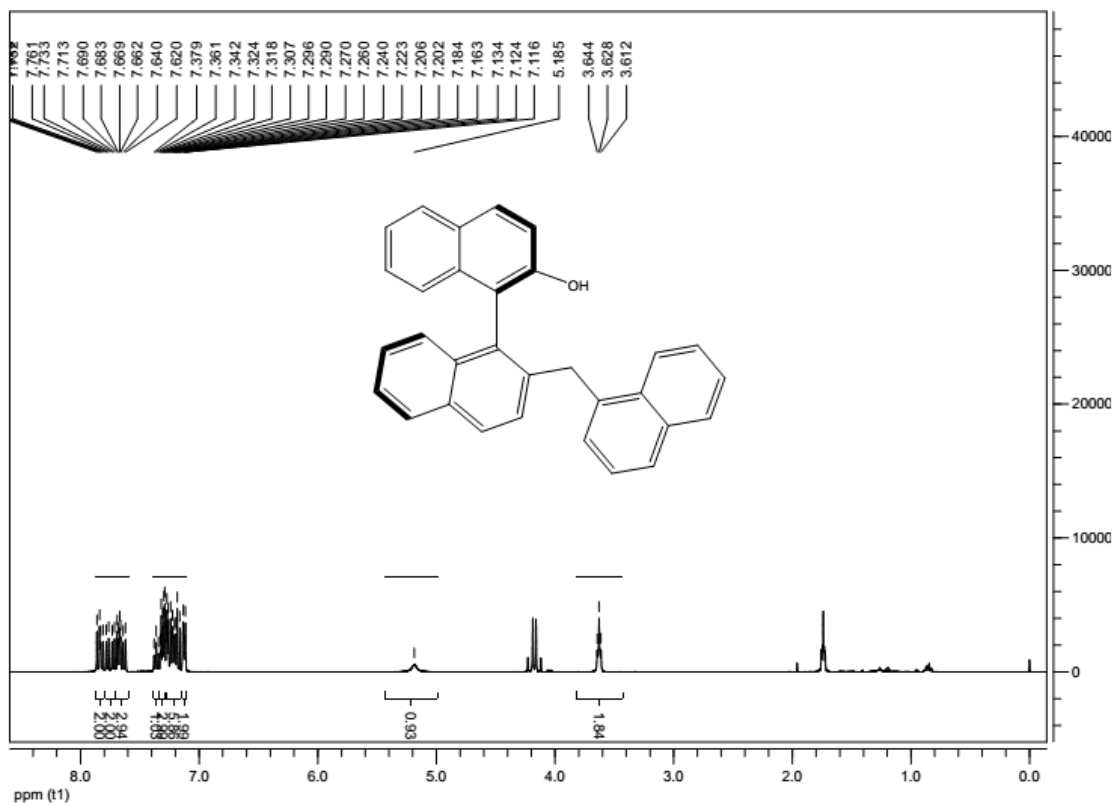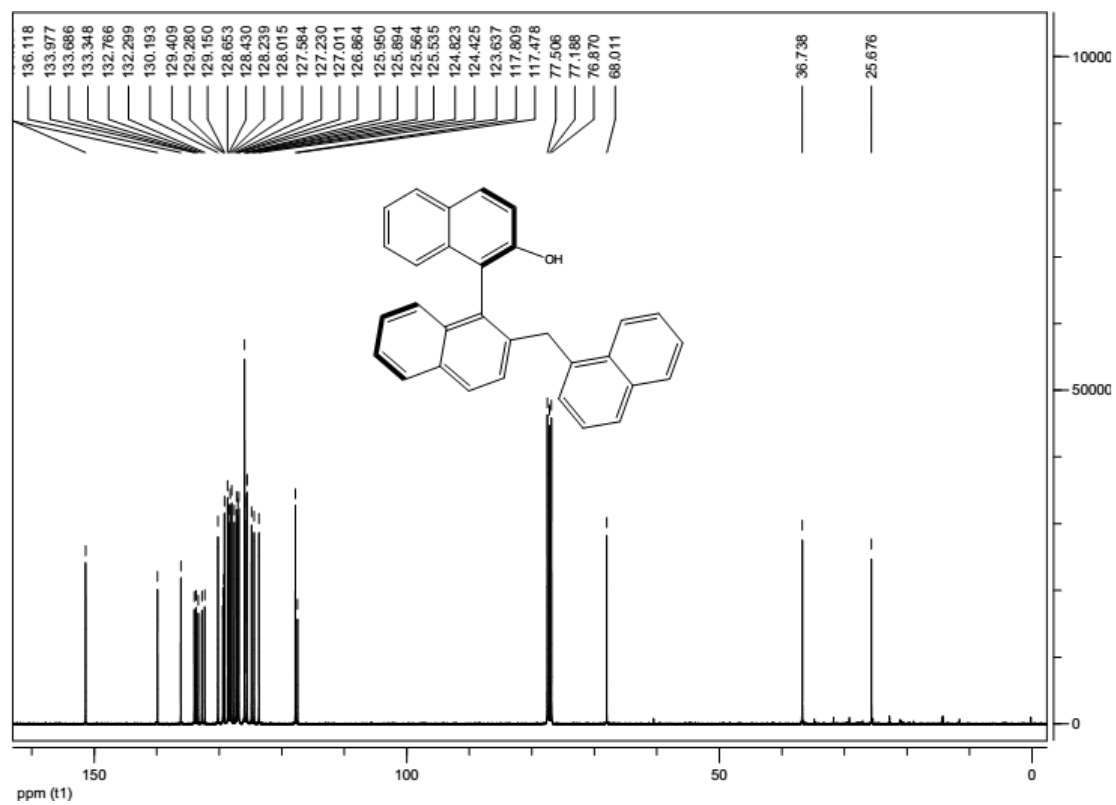

Salen 1d-B:

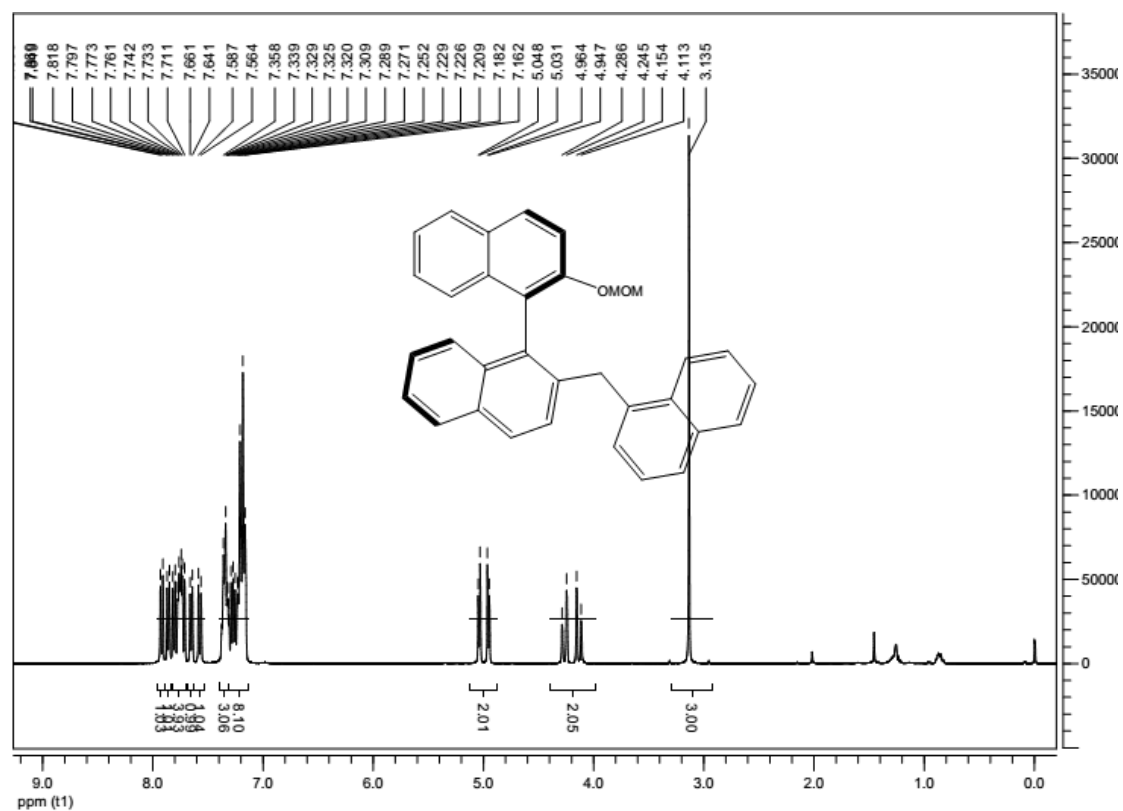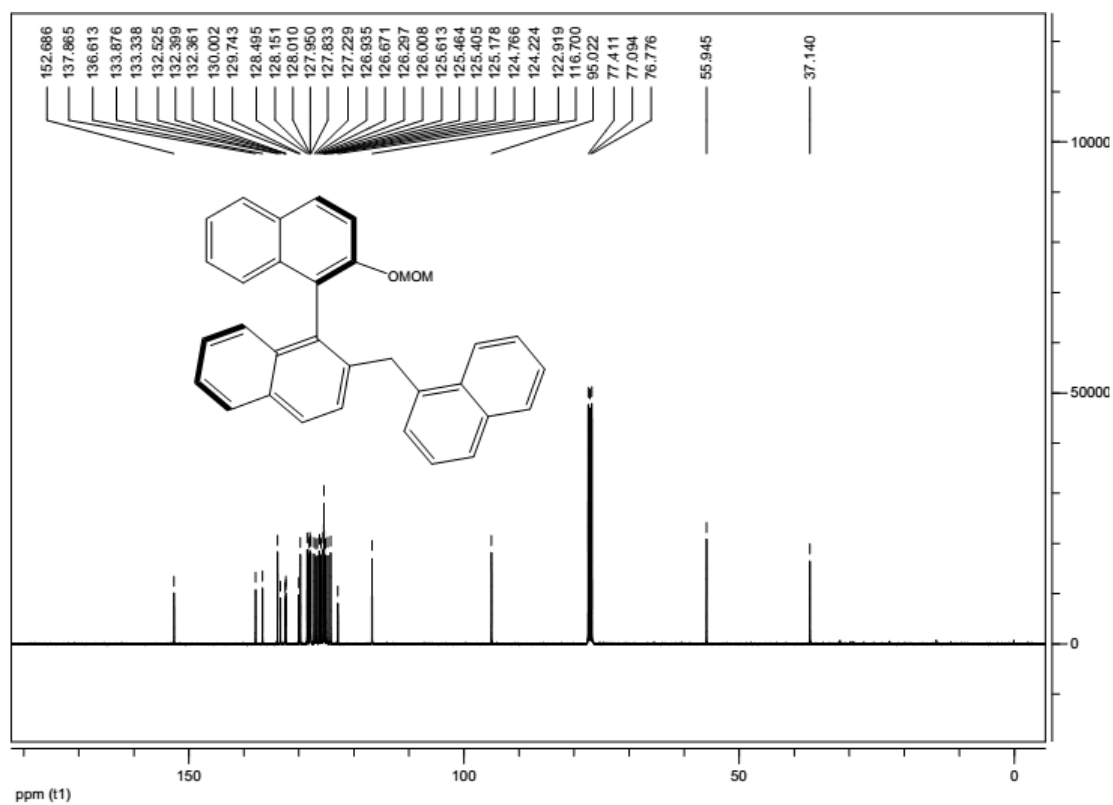

Salen 1d-C:

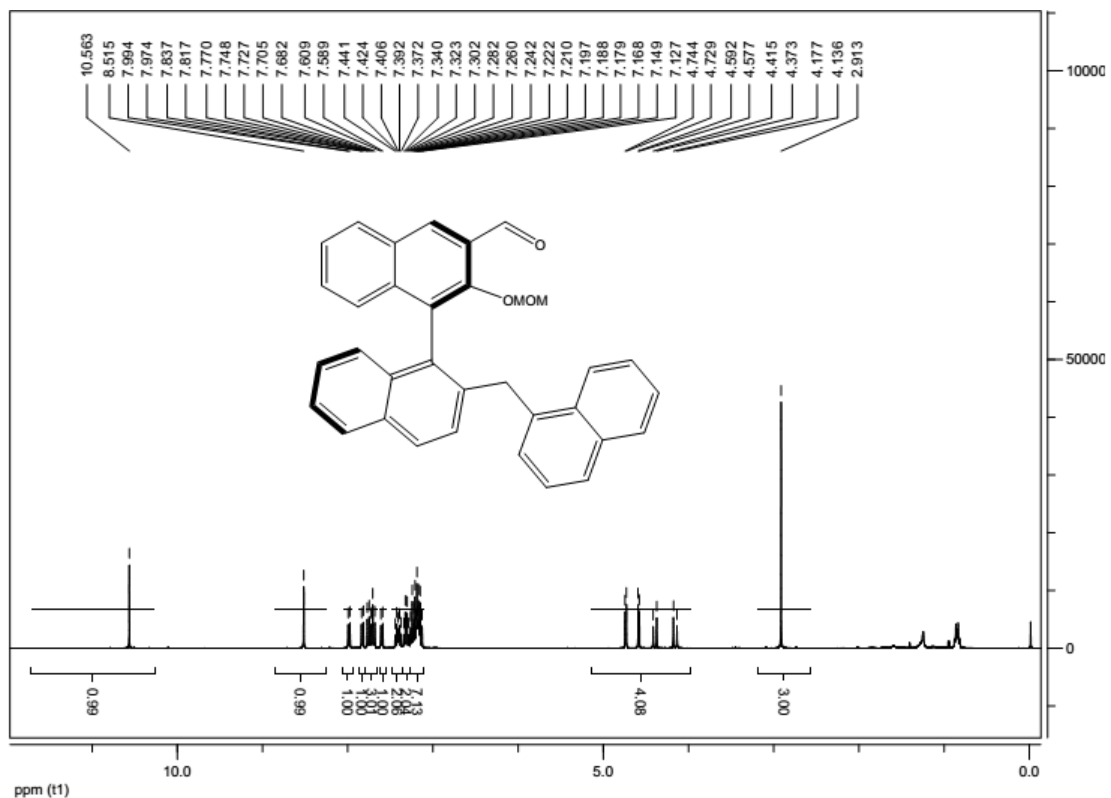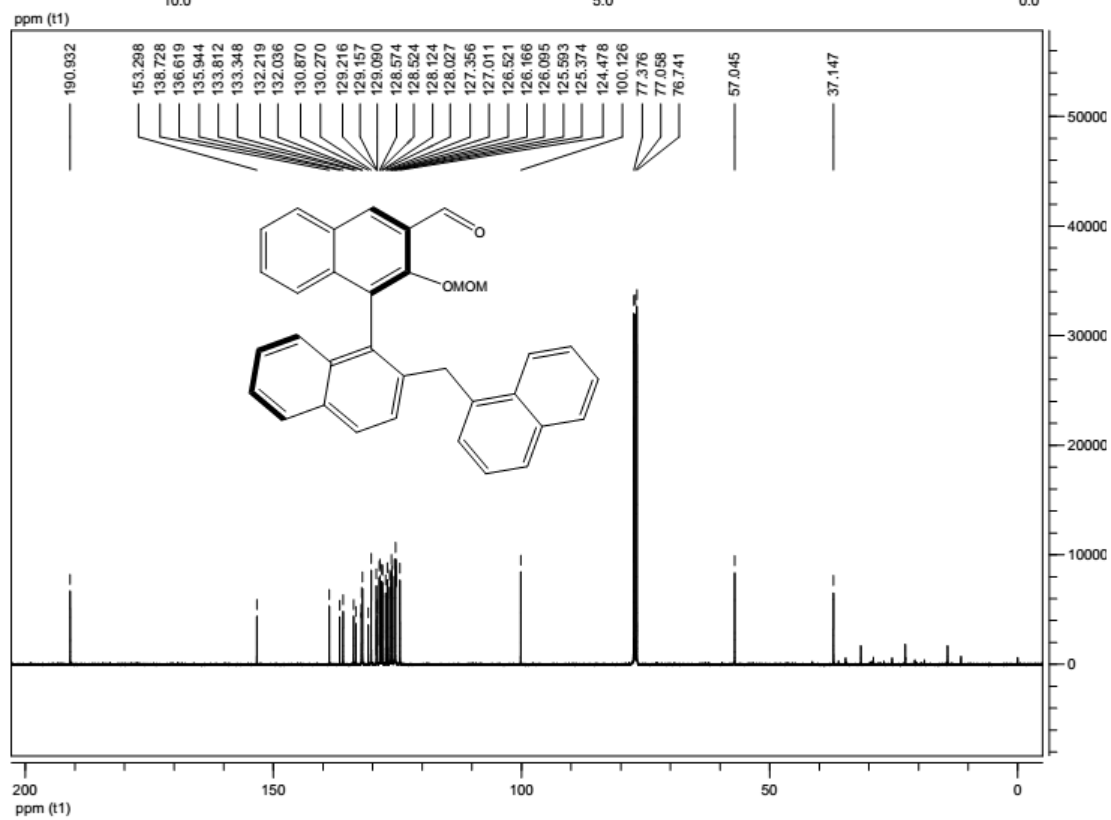

Salen 1d-D:



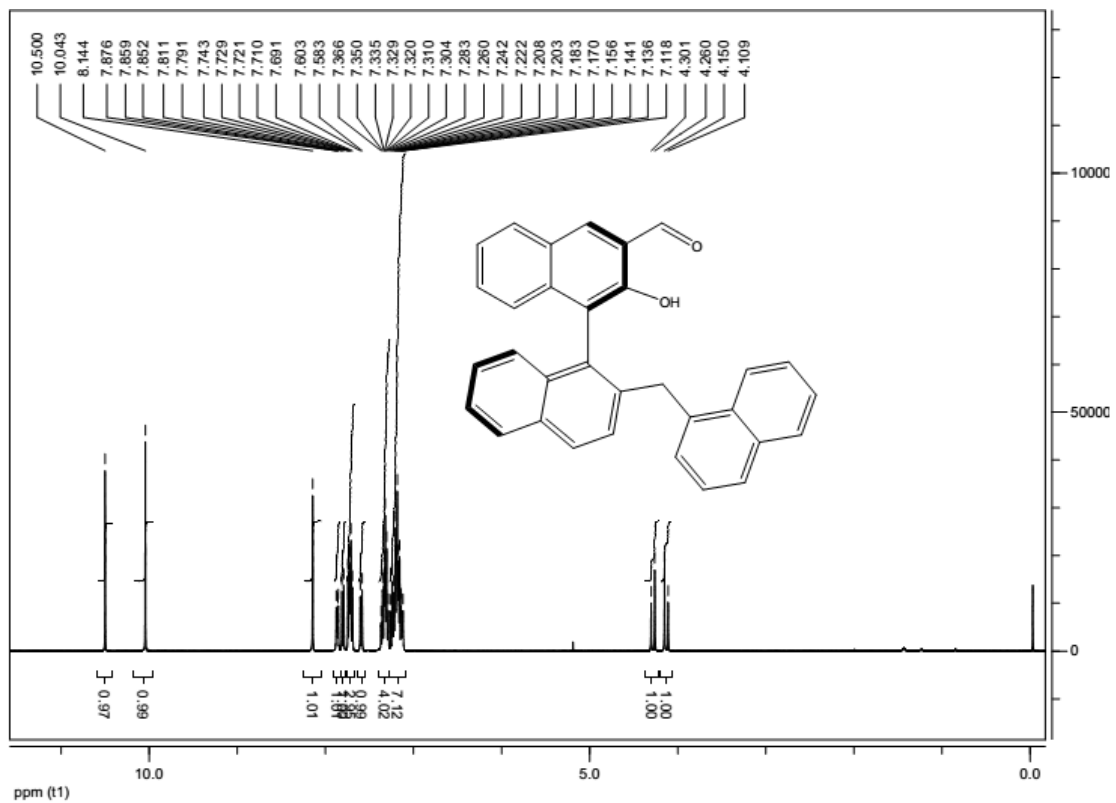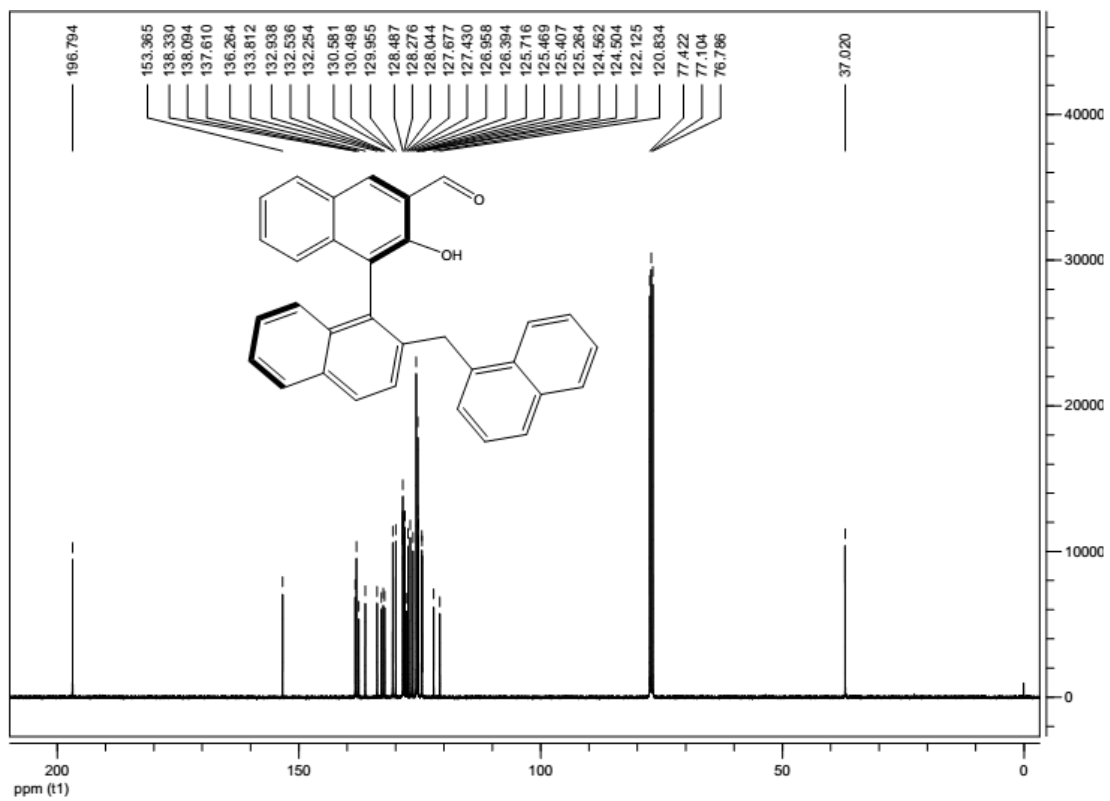

Salen 1d

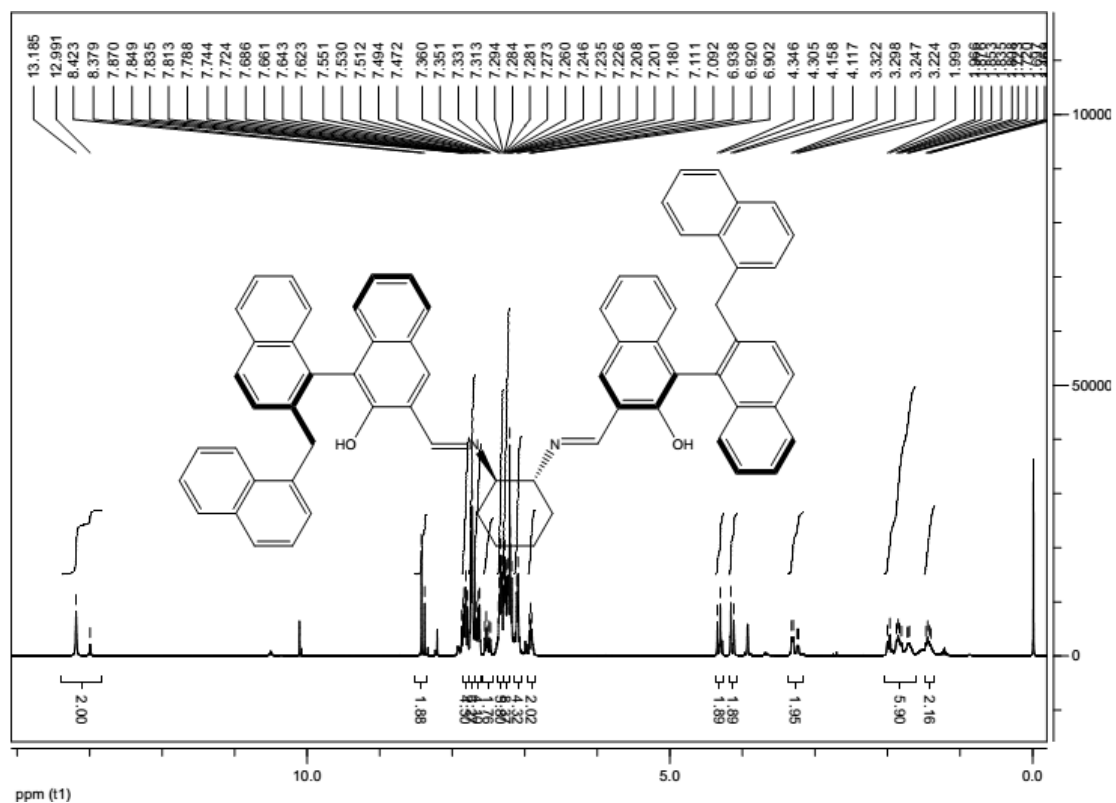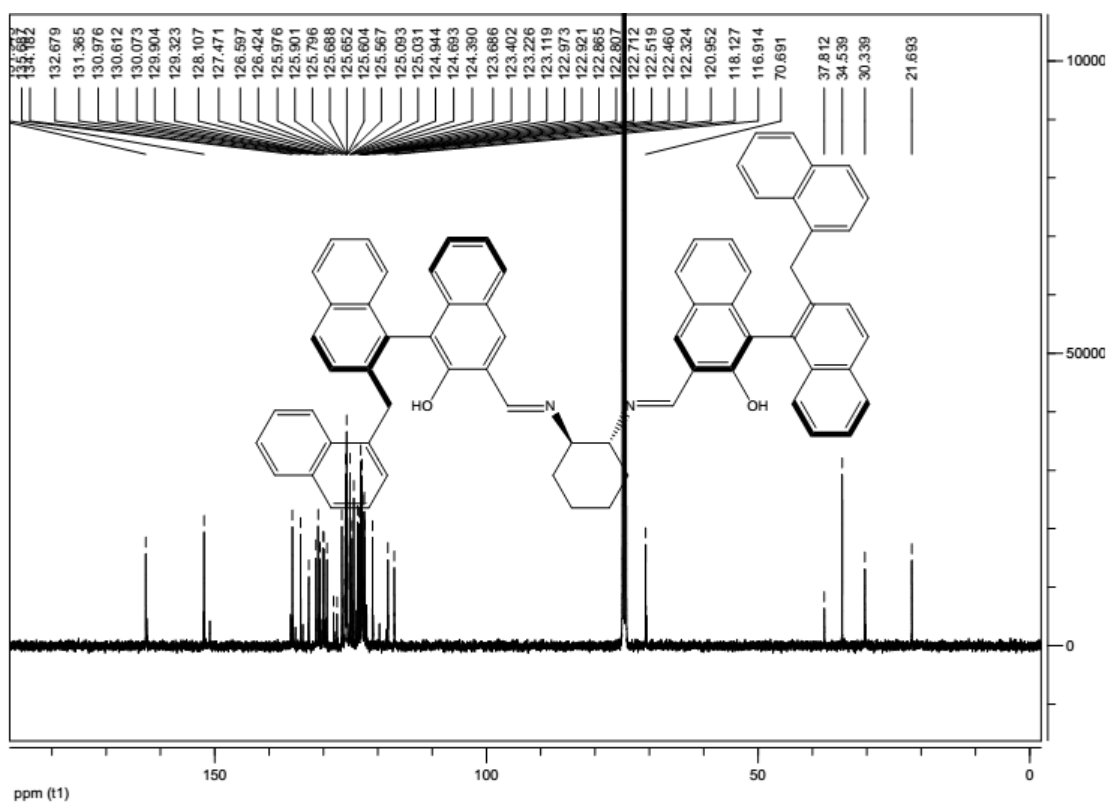

## NMR Charts of Compounds:

3a:

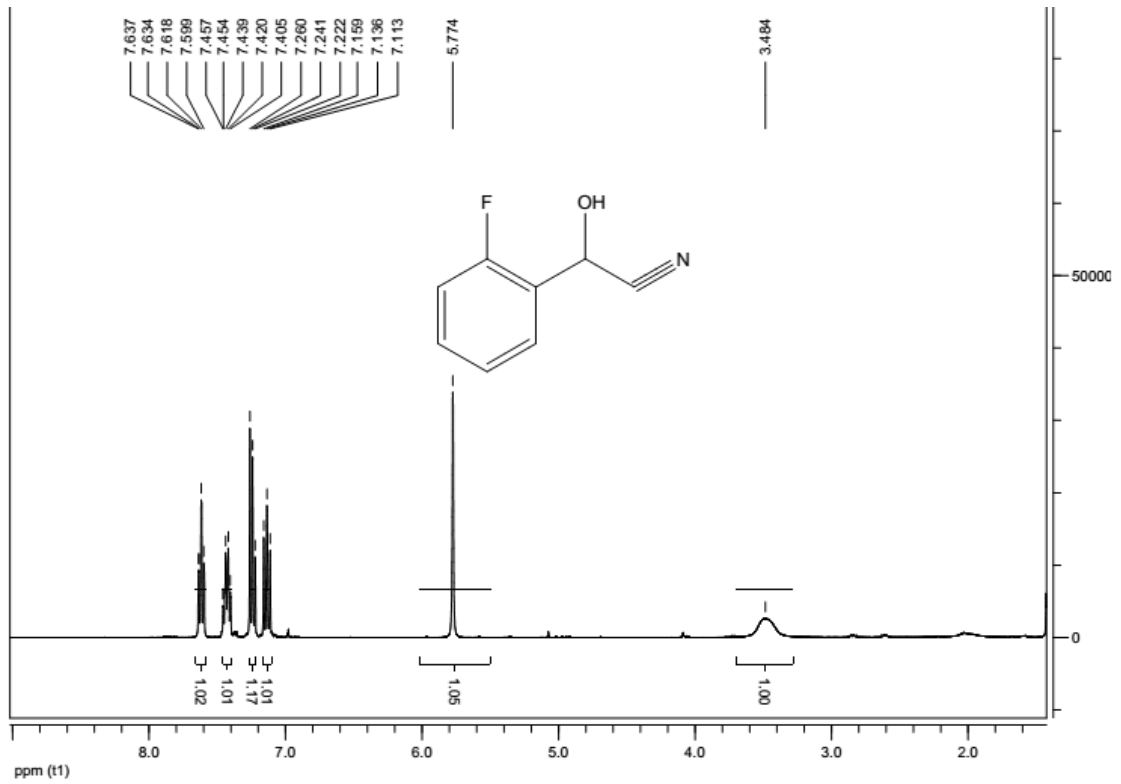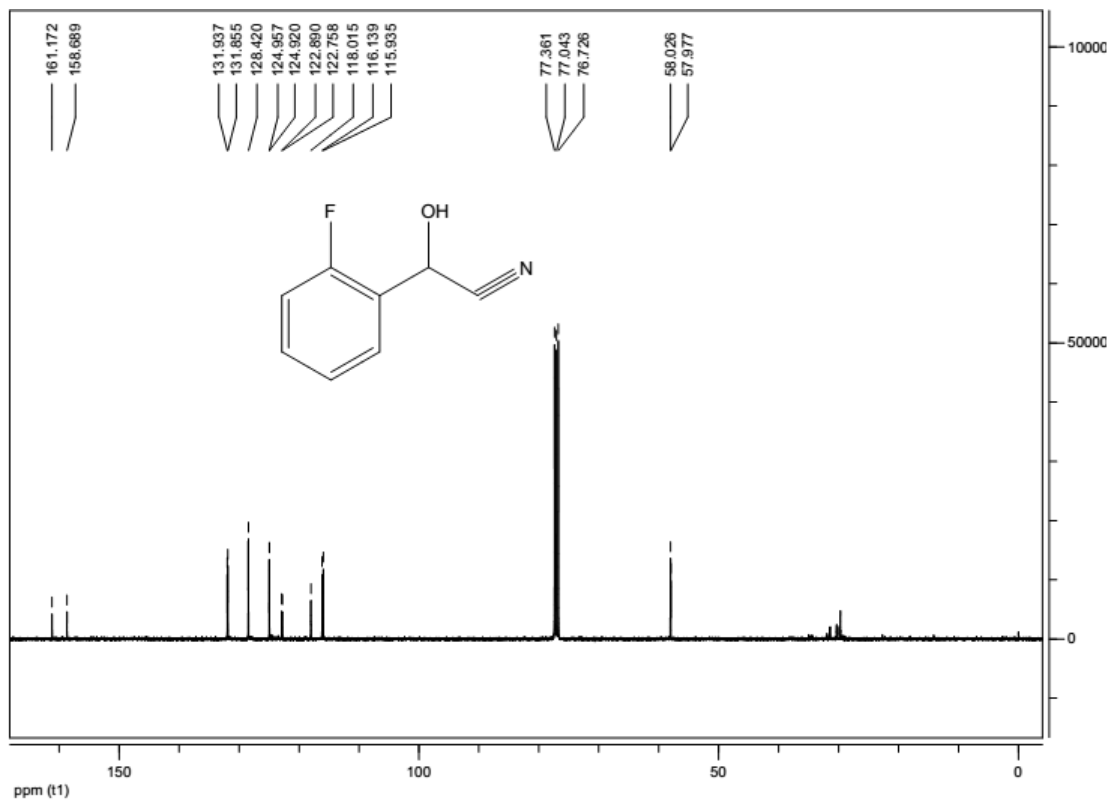

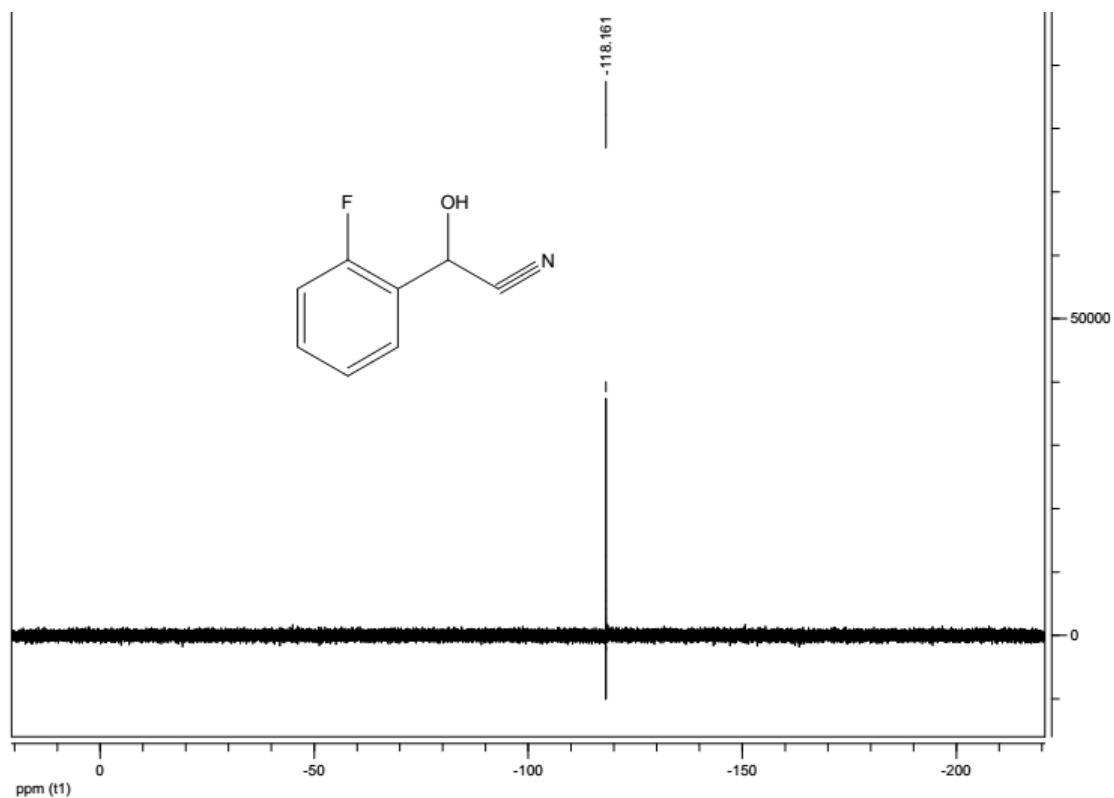

3b:

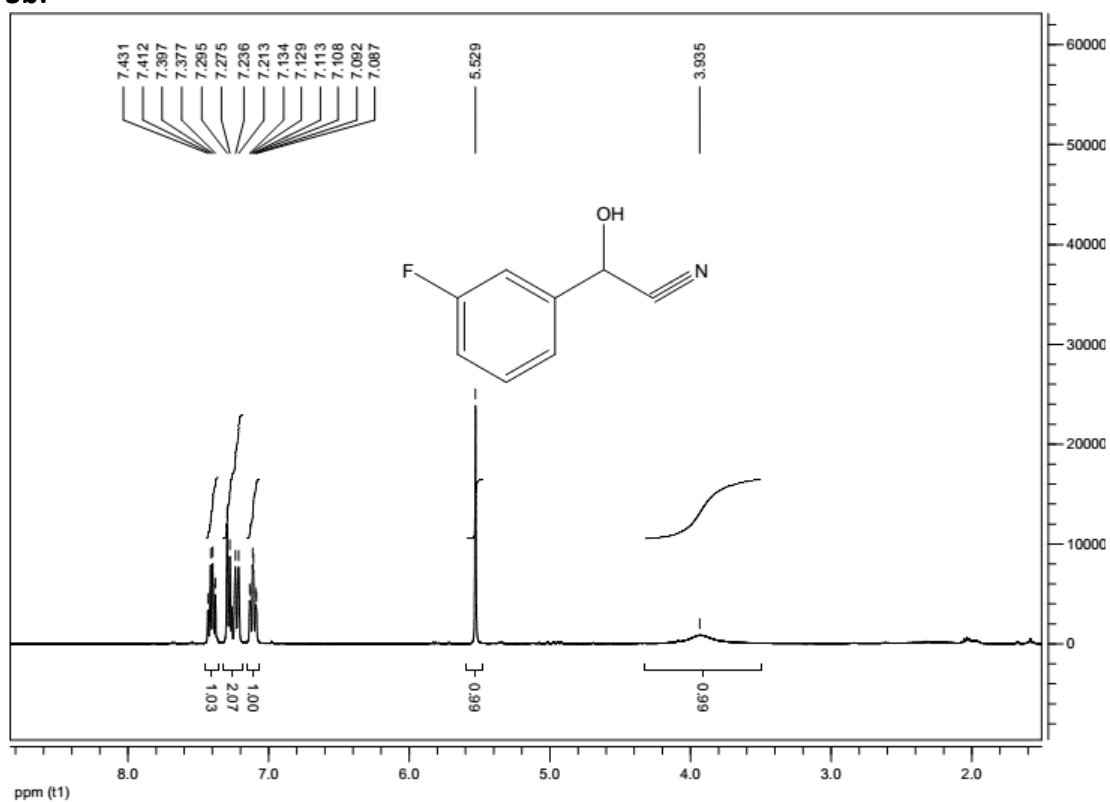

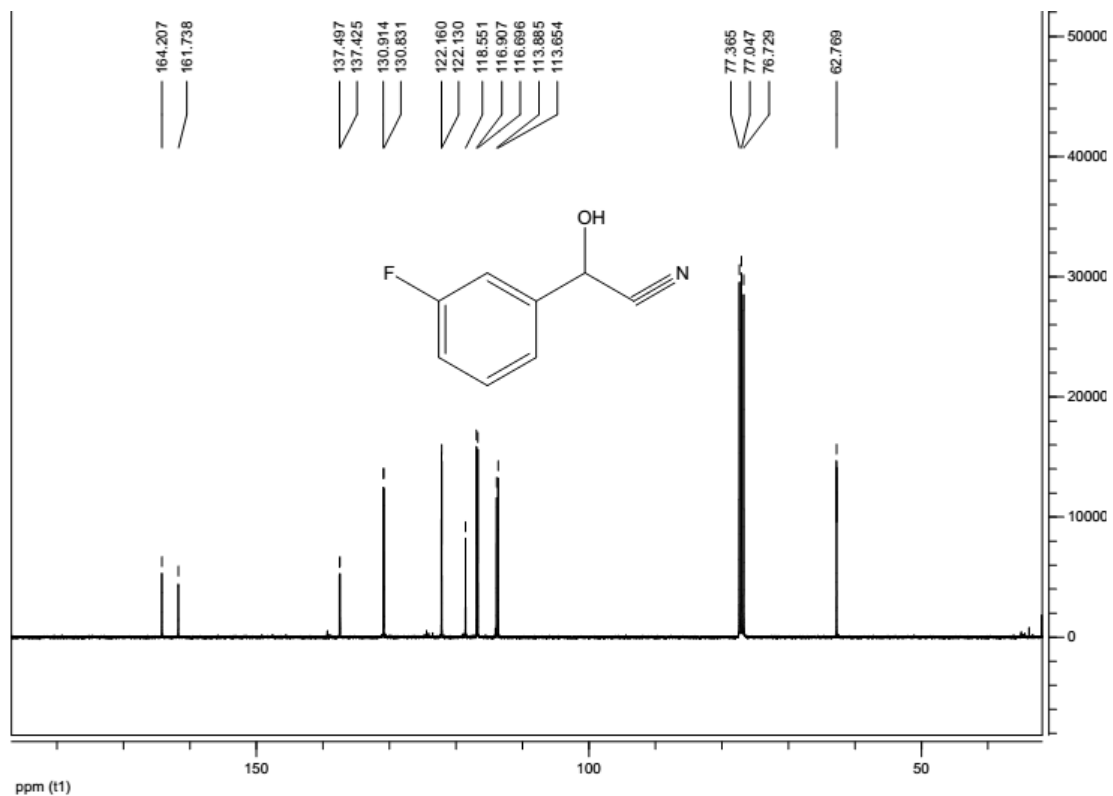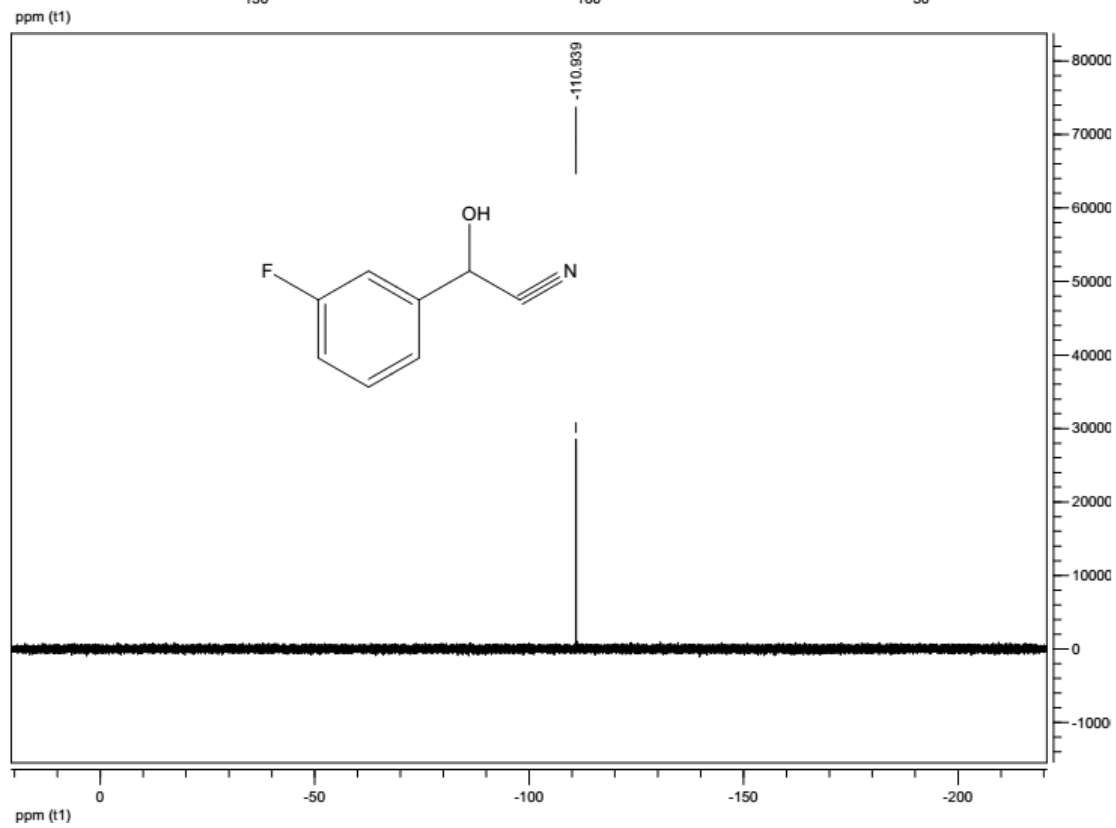

3c:

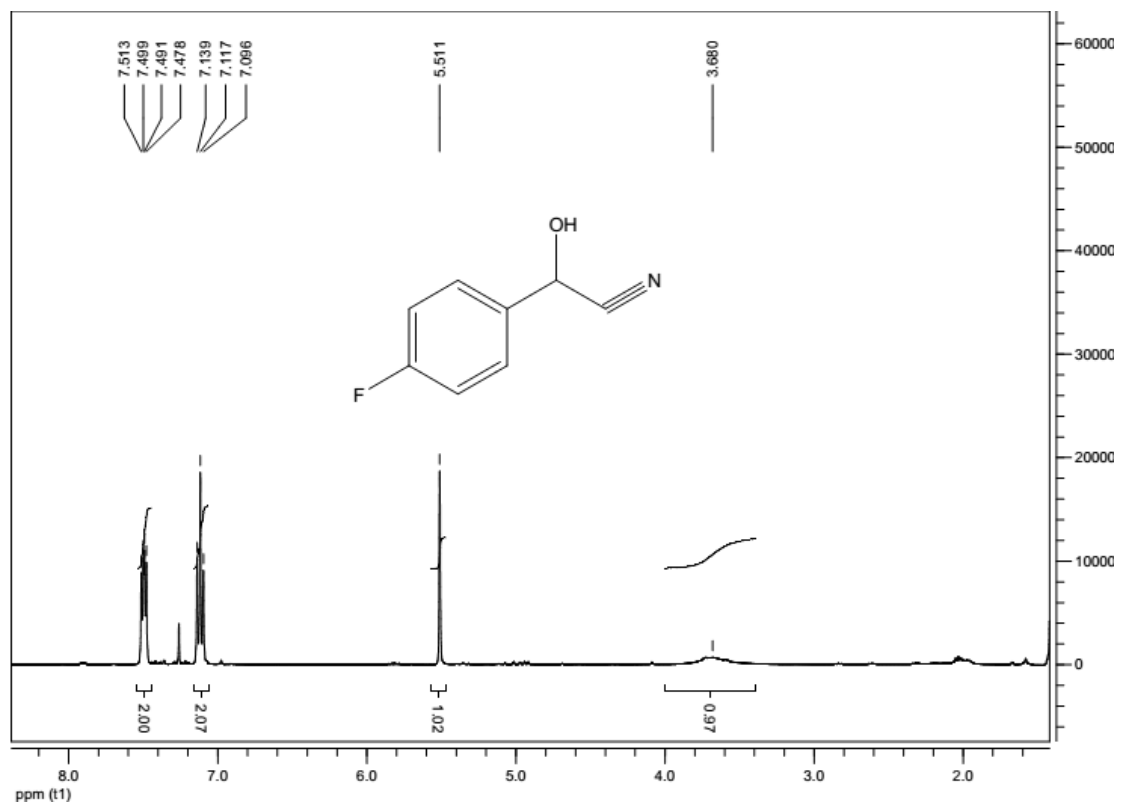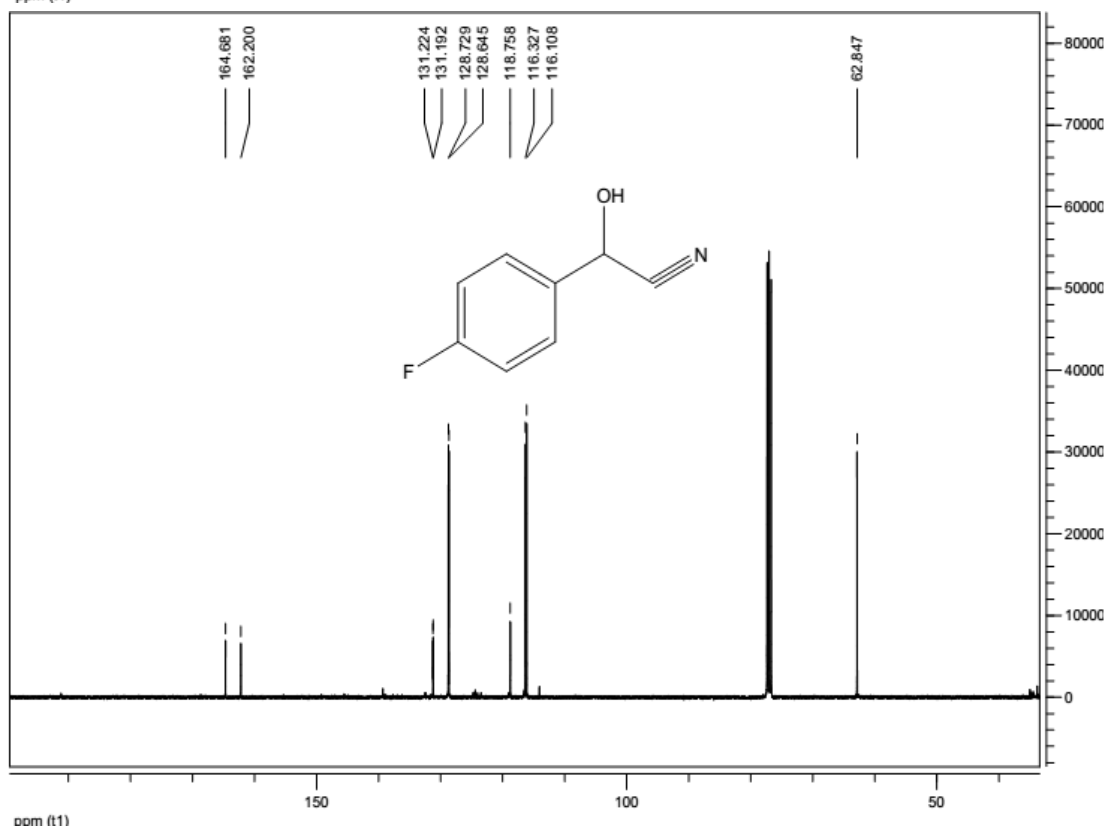

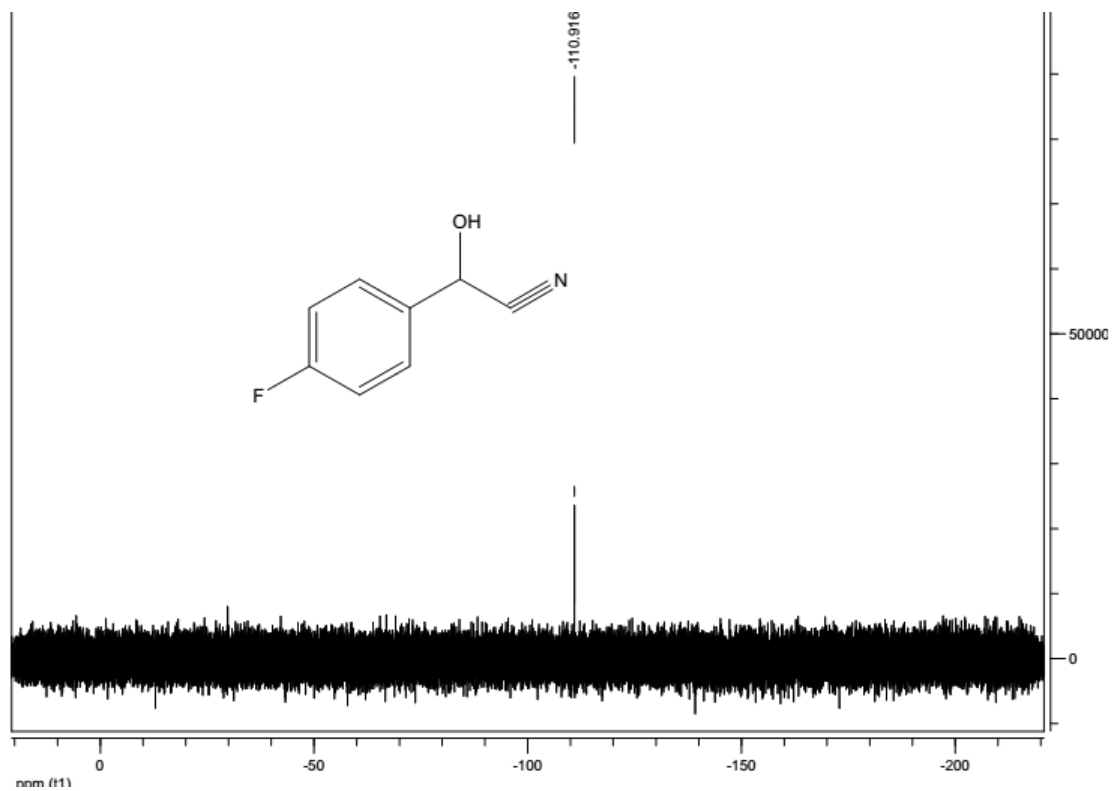

**3d:**

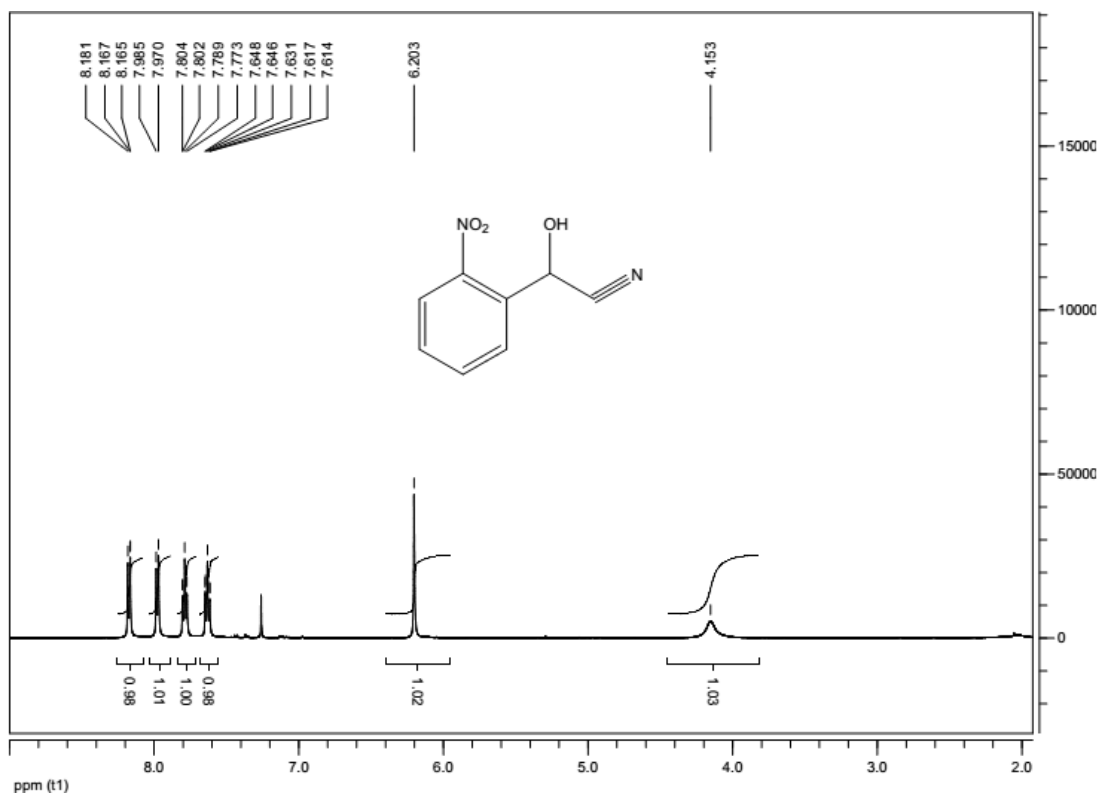

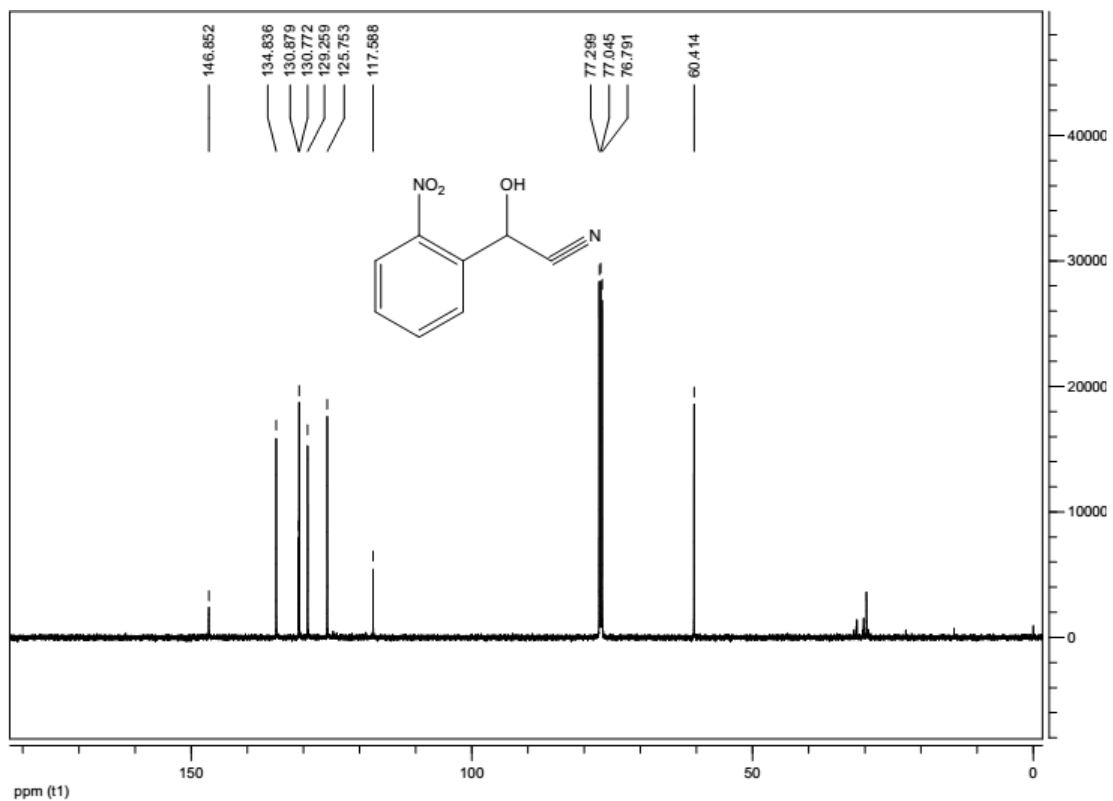

**3e:**

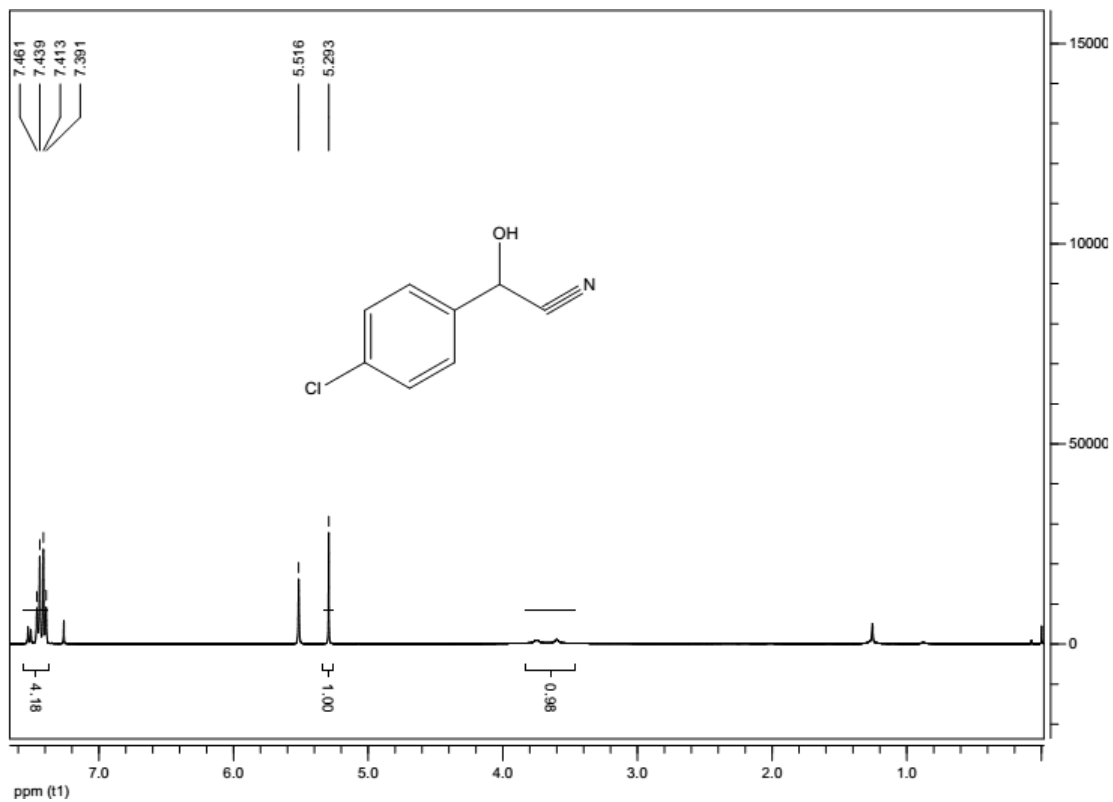



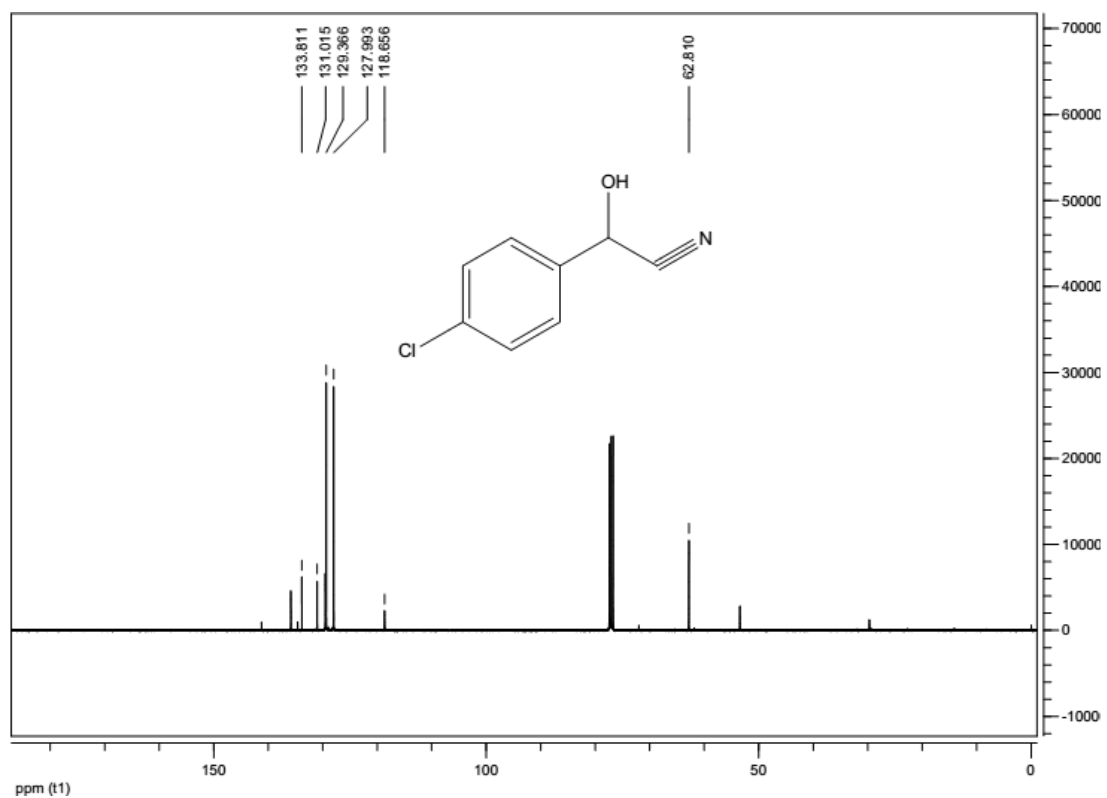

**3f:**

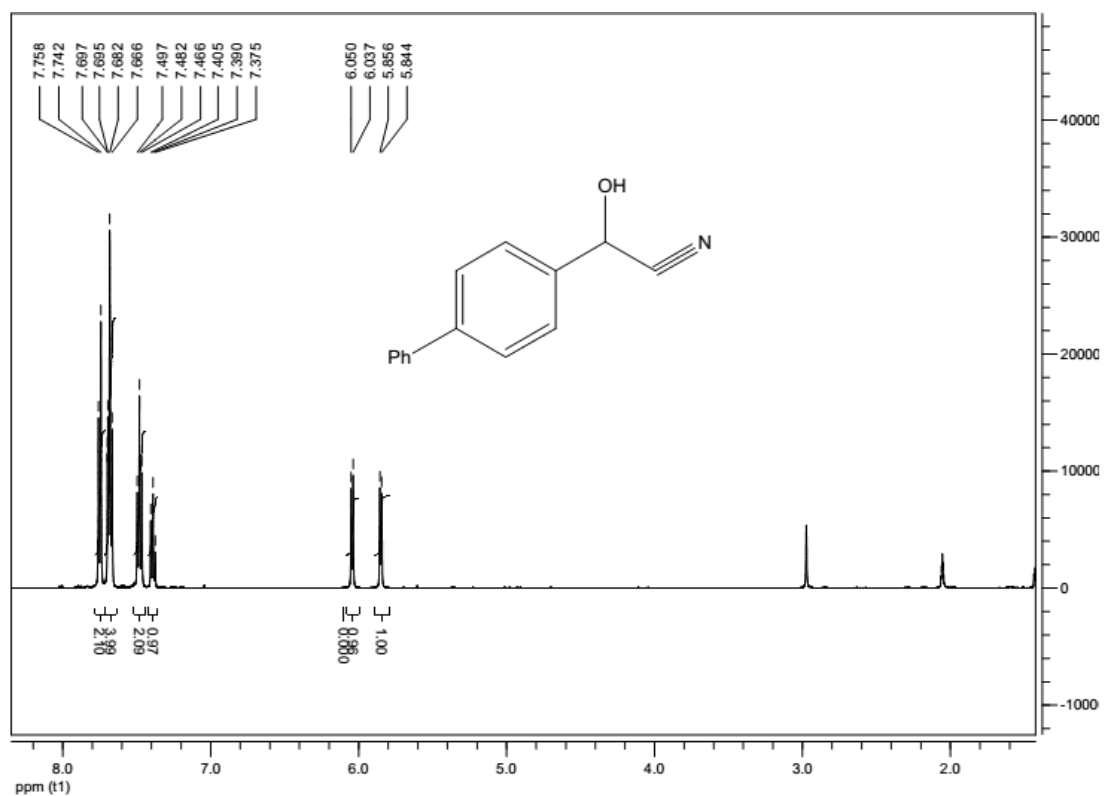



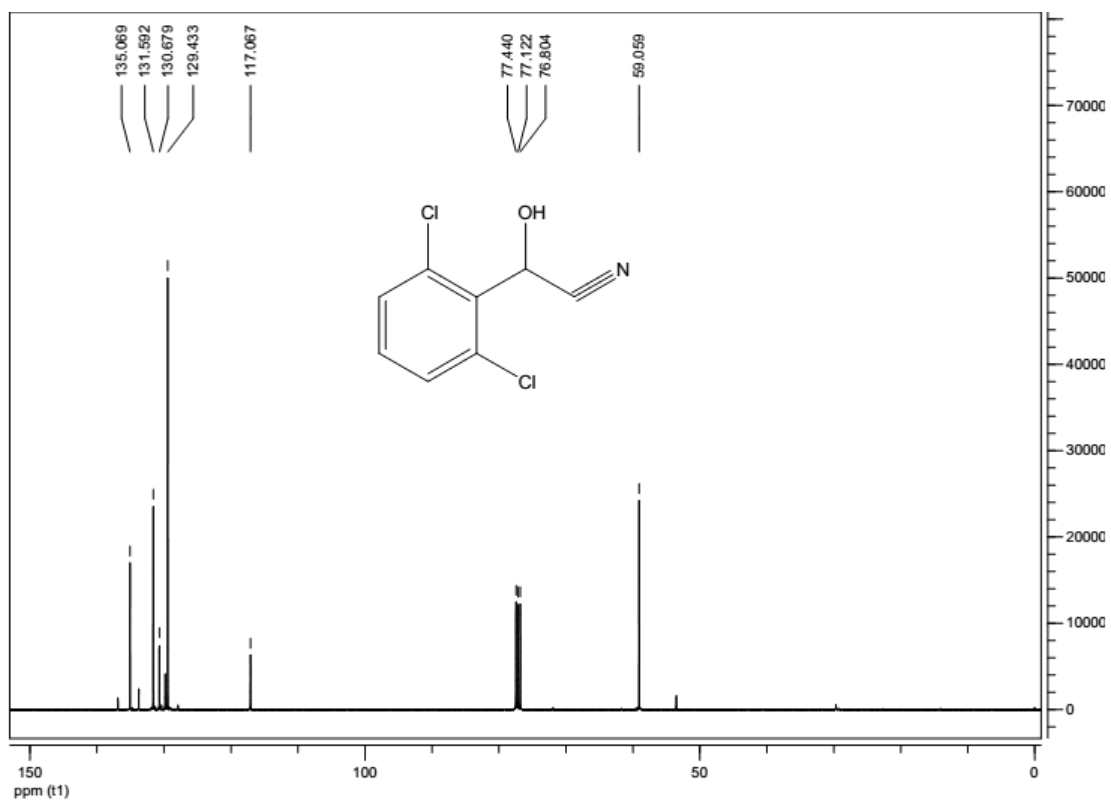

**3h:**

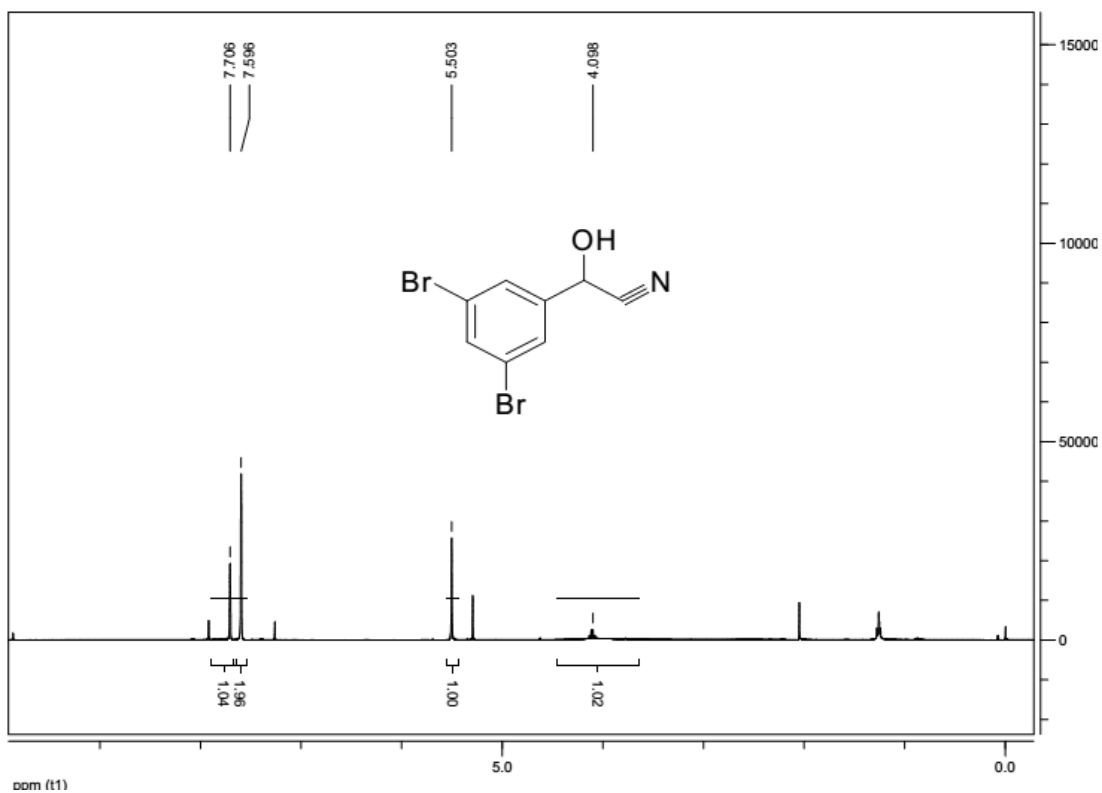



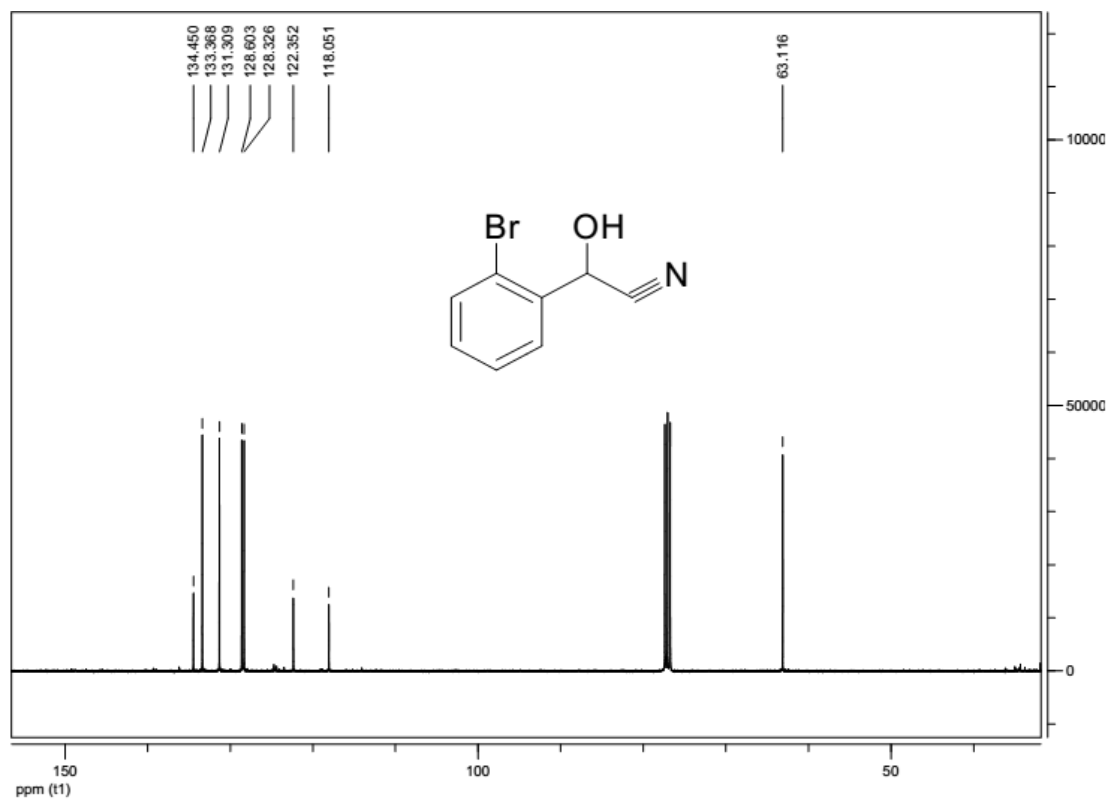

3j:

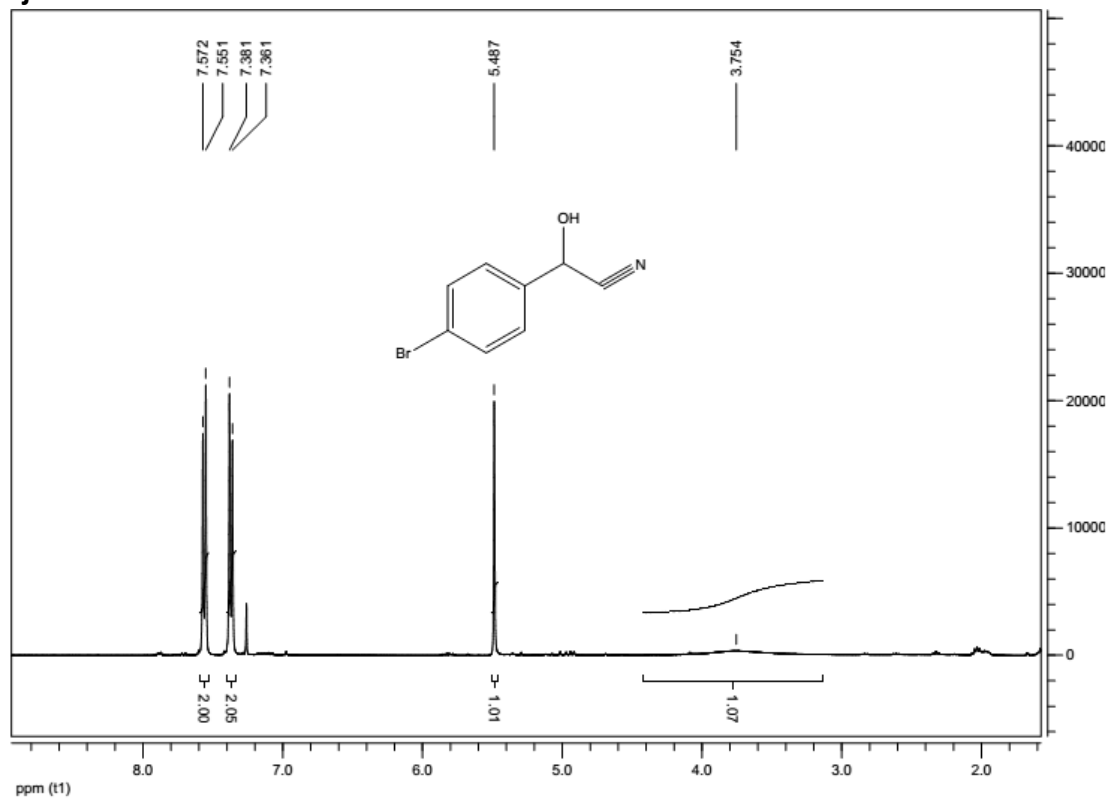

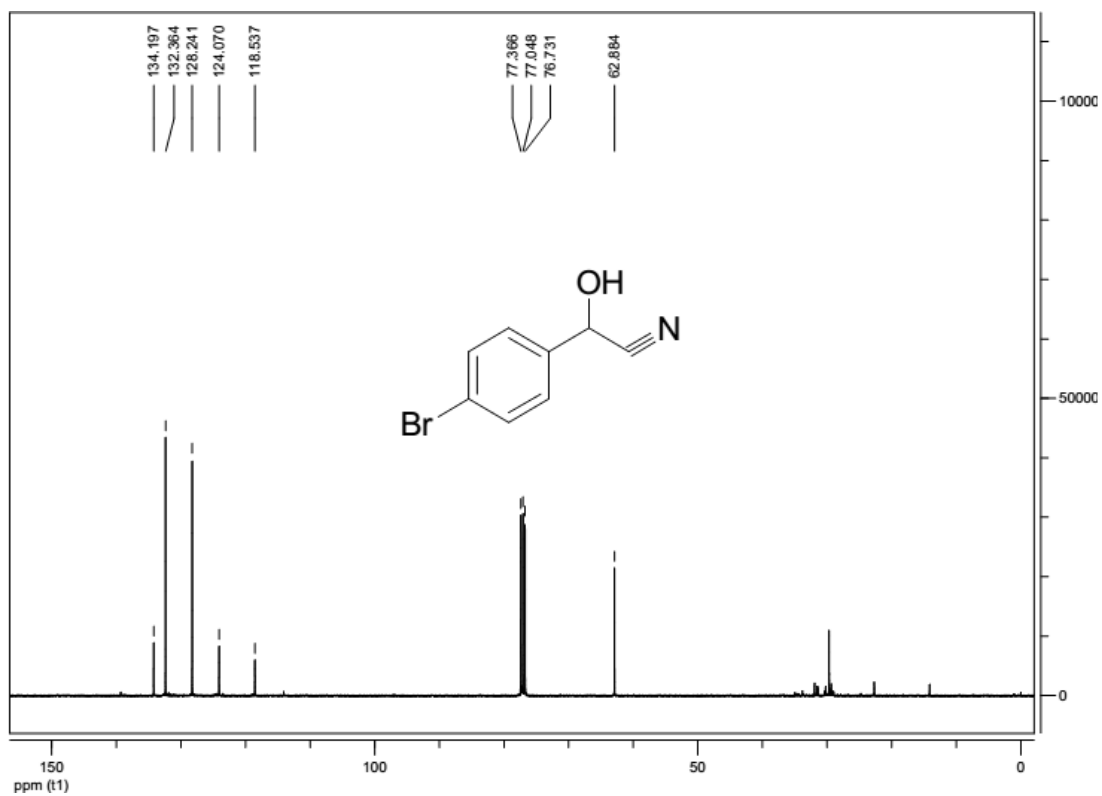

3k:

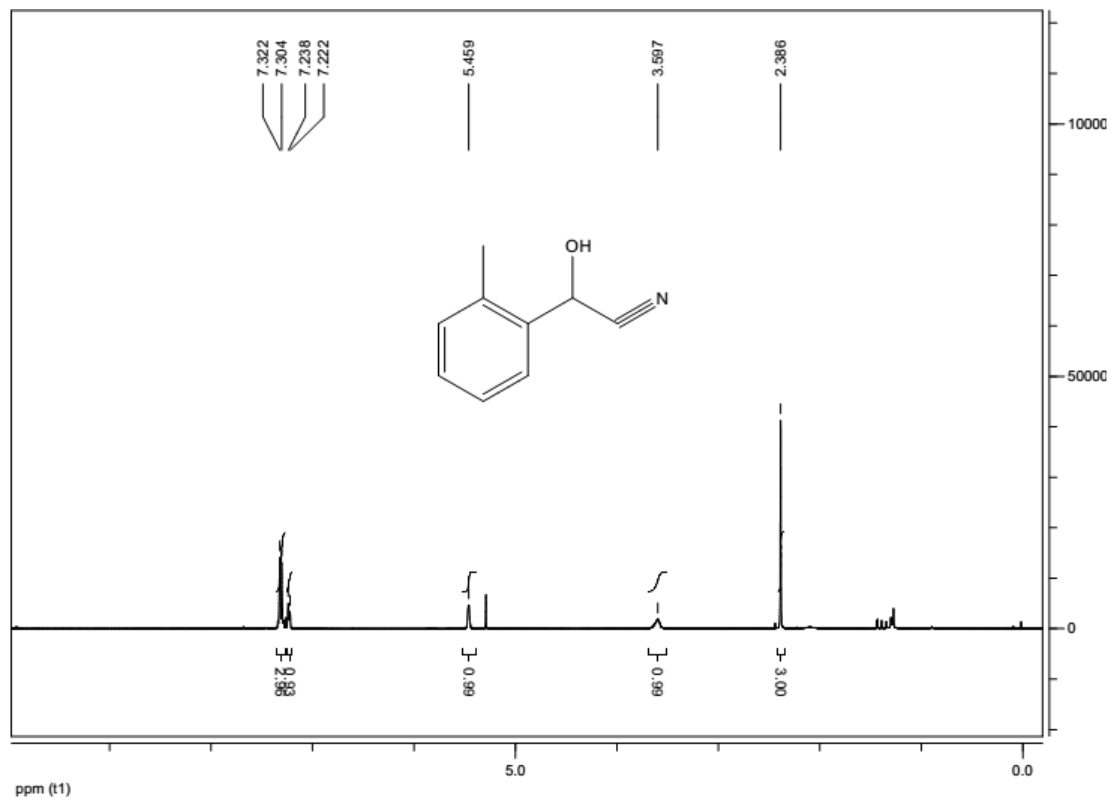

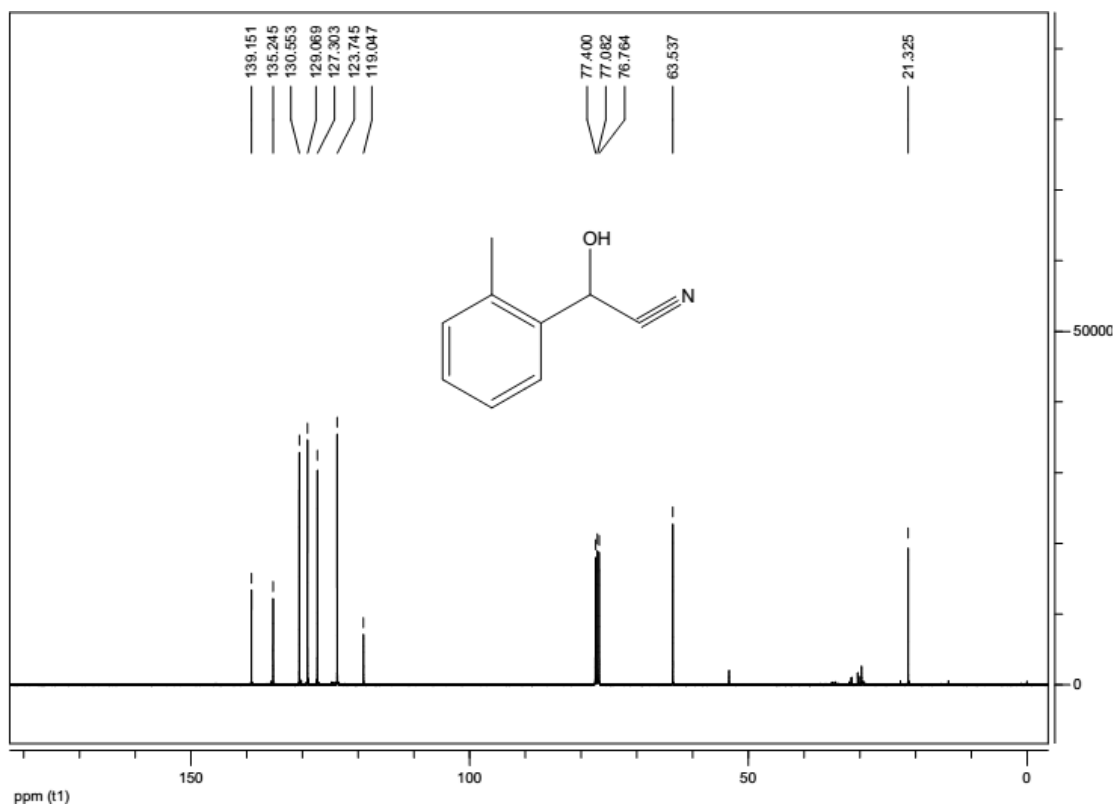

3l:

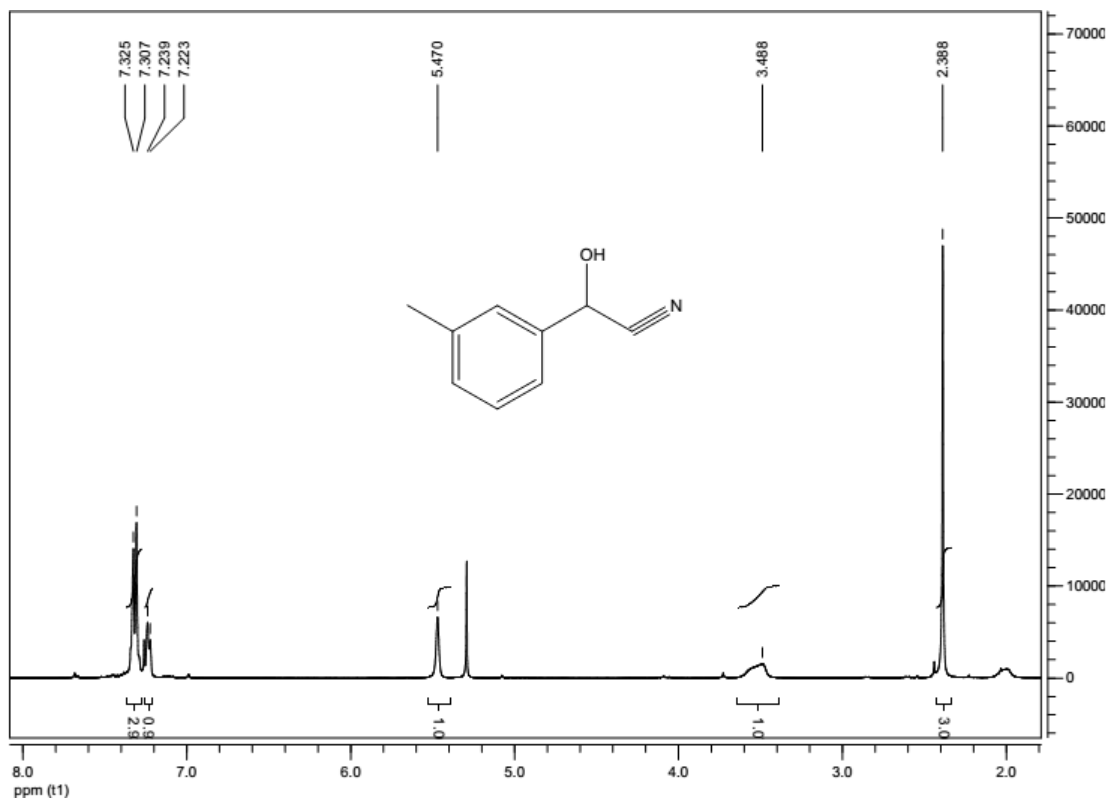

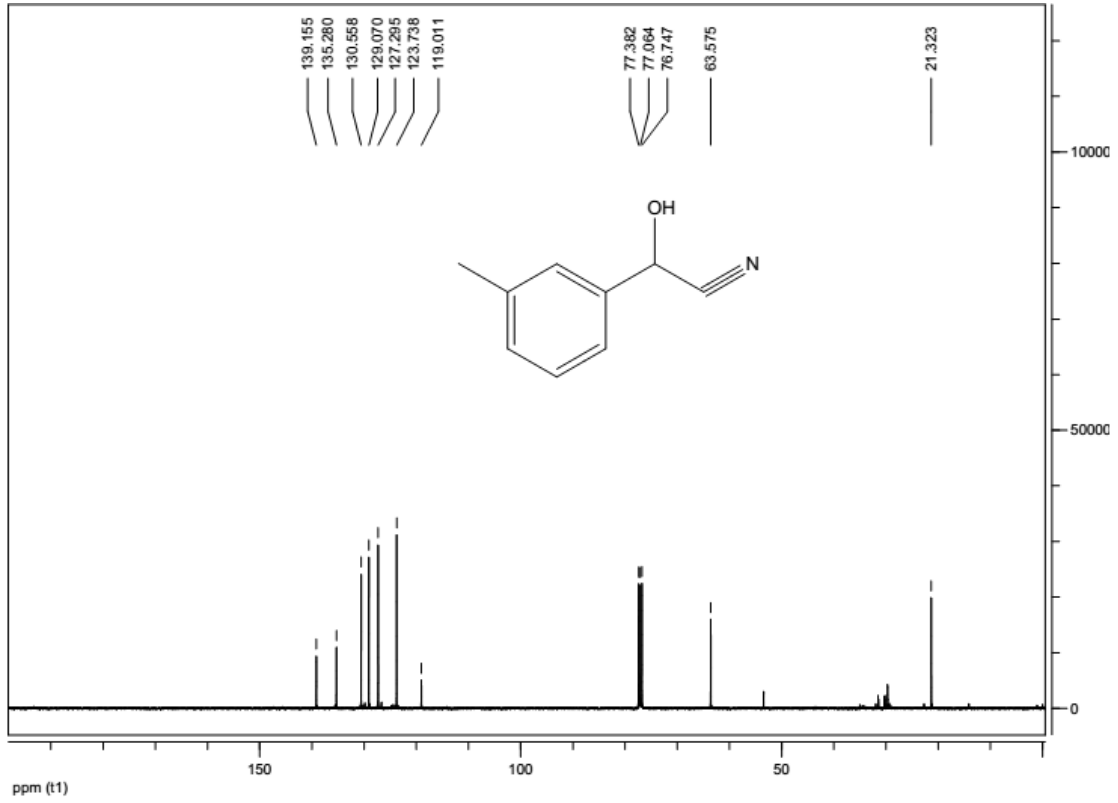

**3m:**

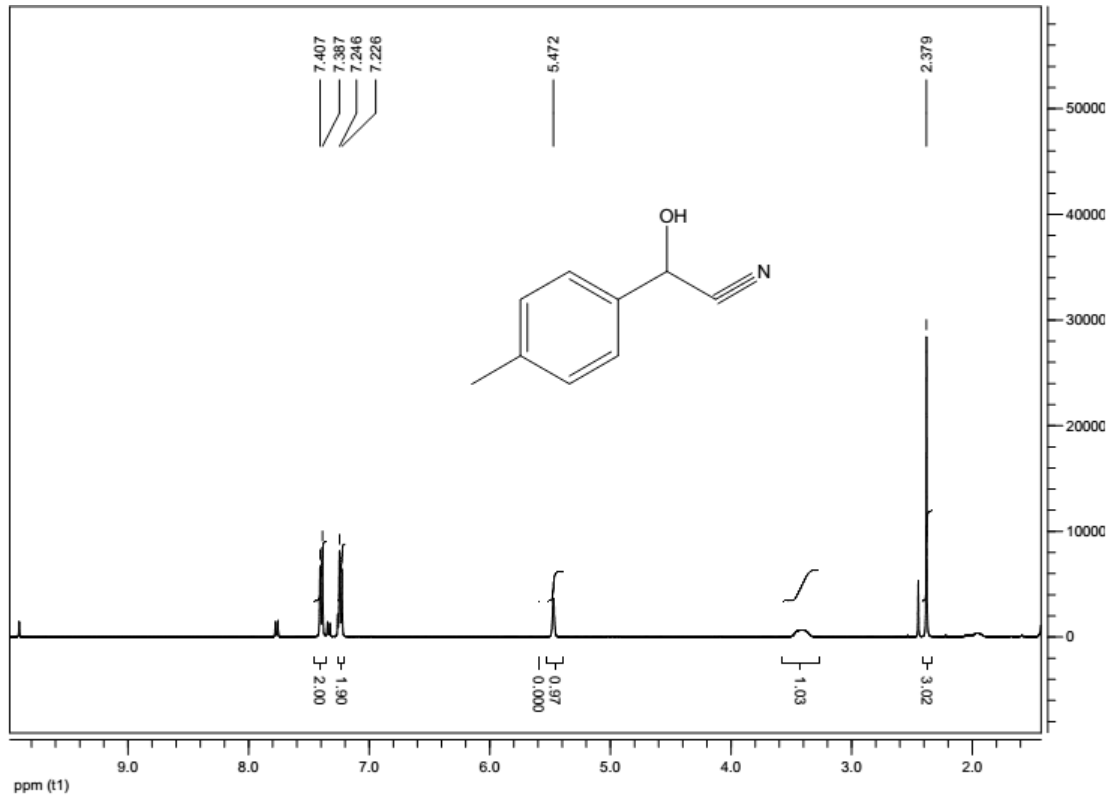



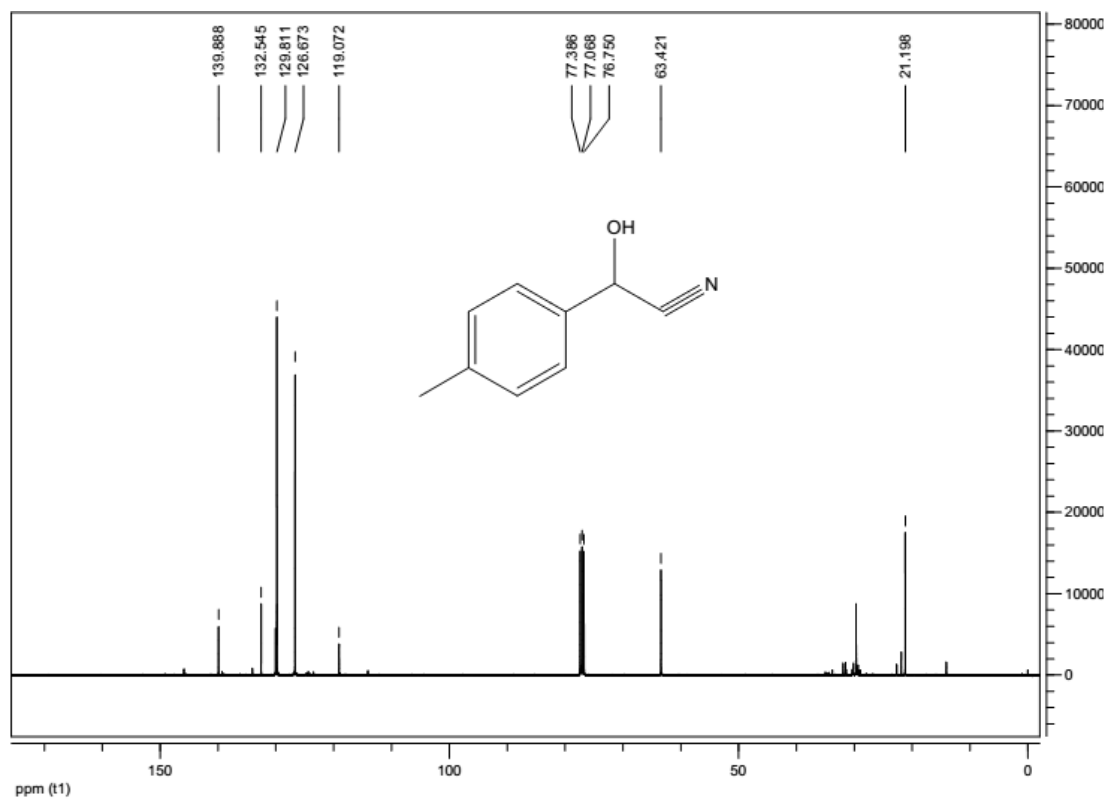

**3n:**

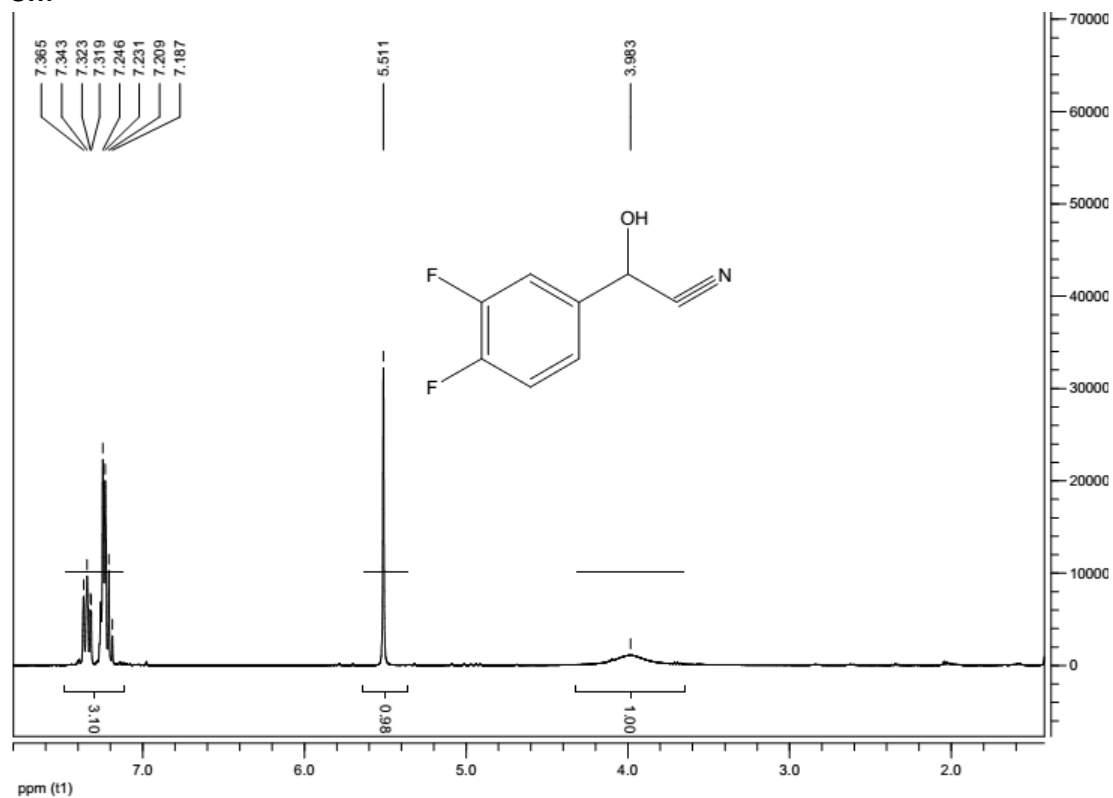

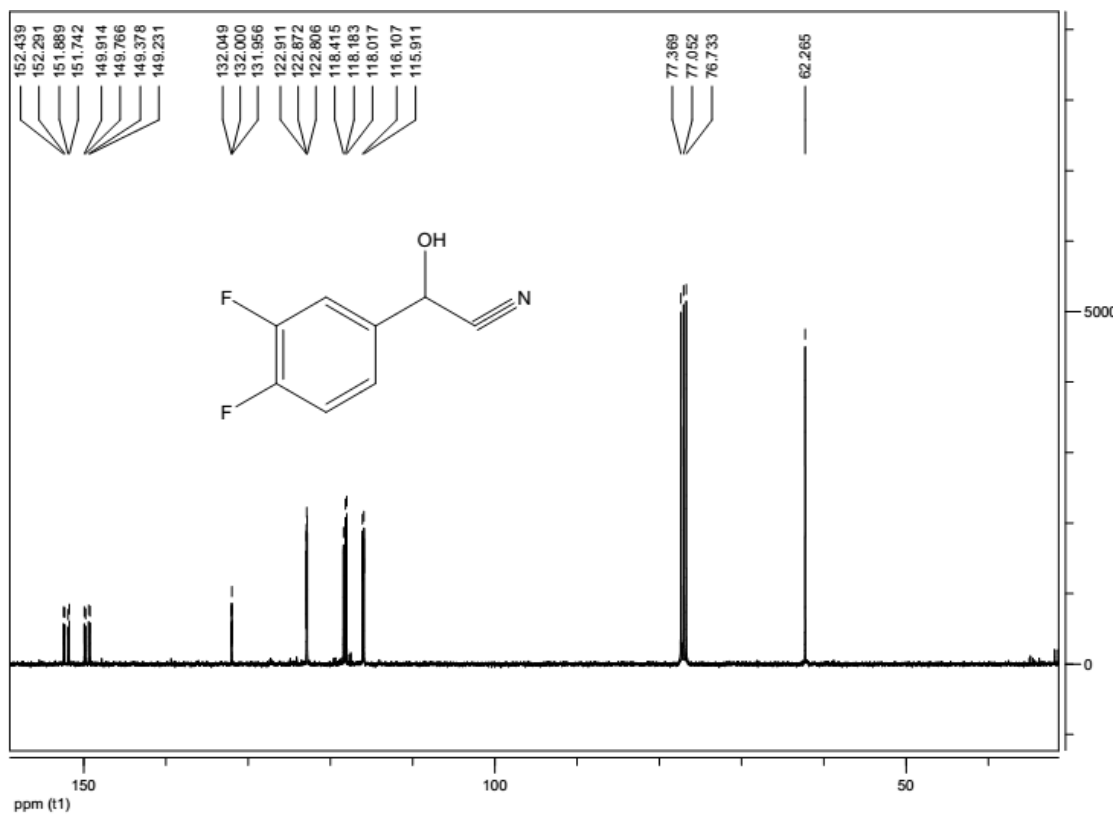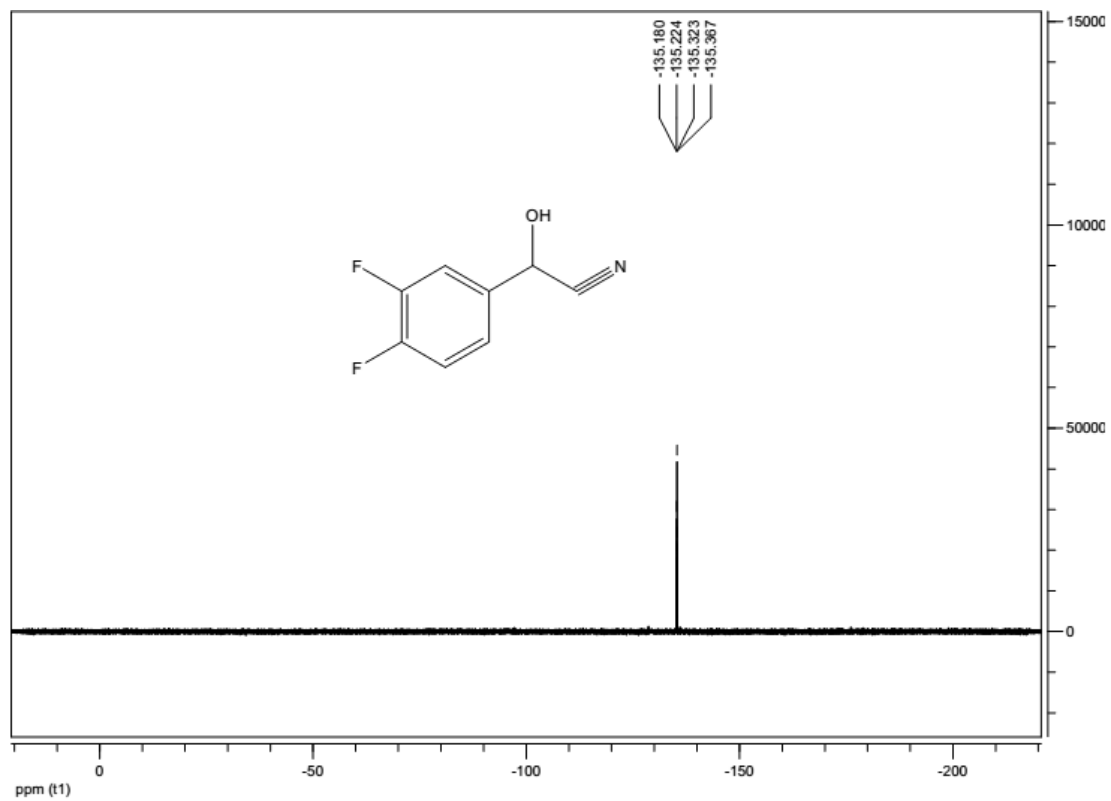

**30:**

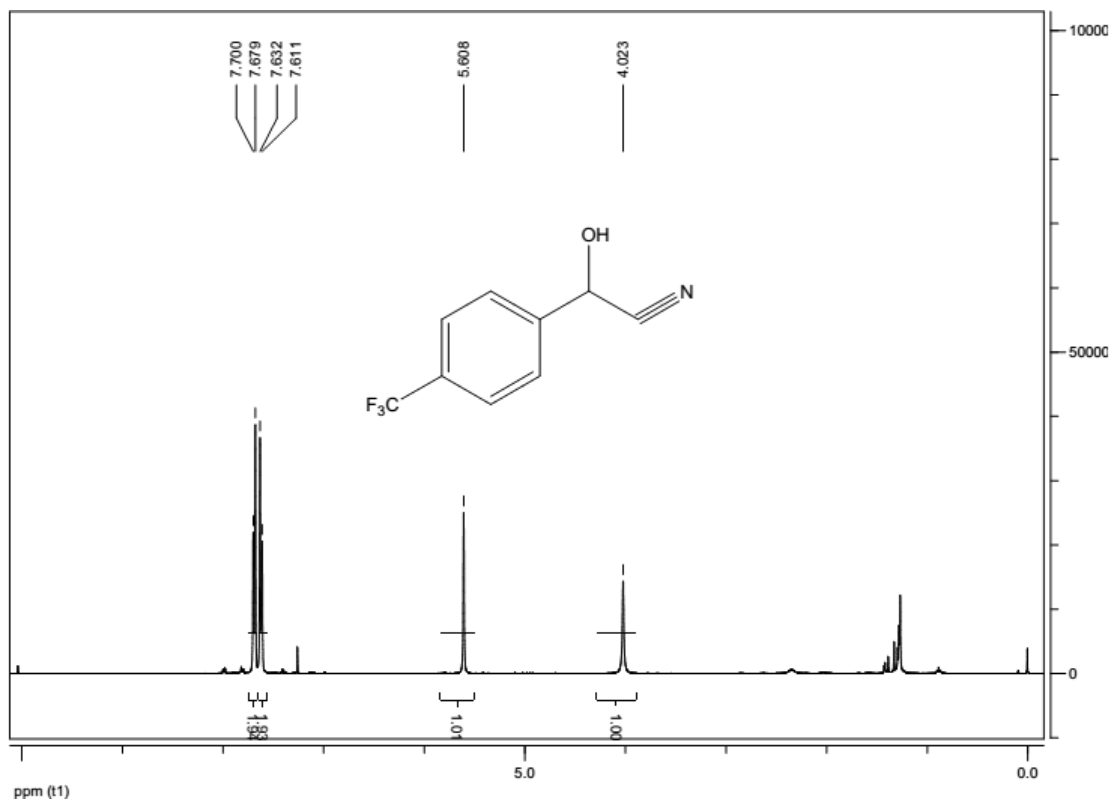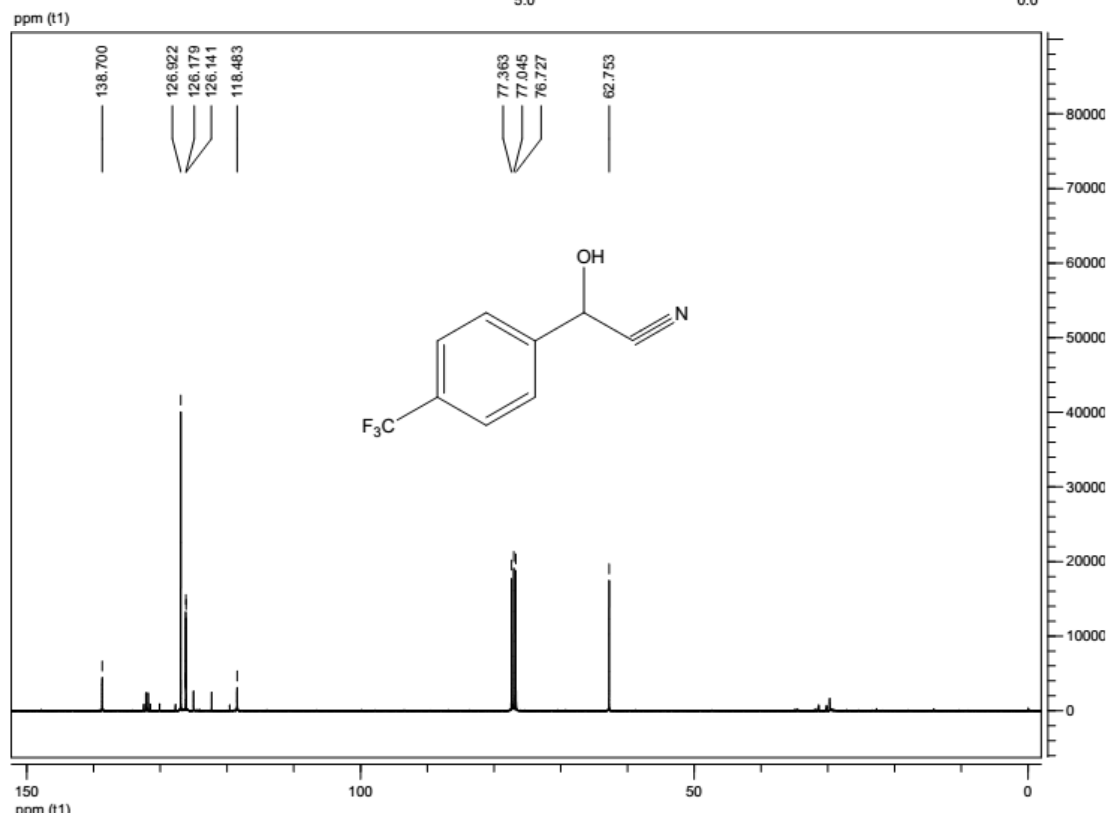

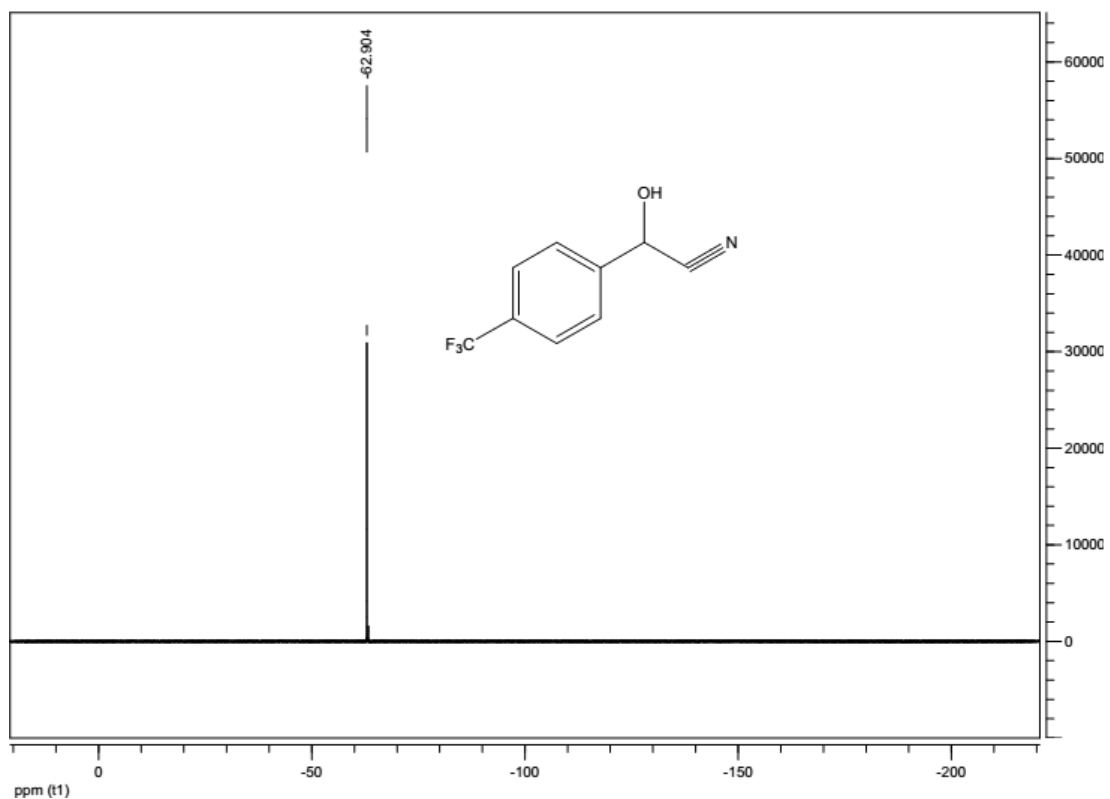

**3p:**

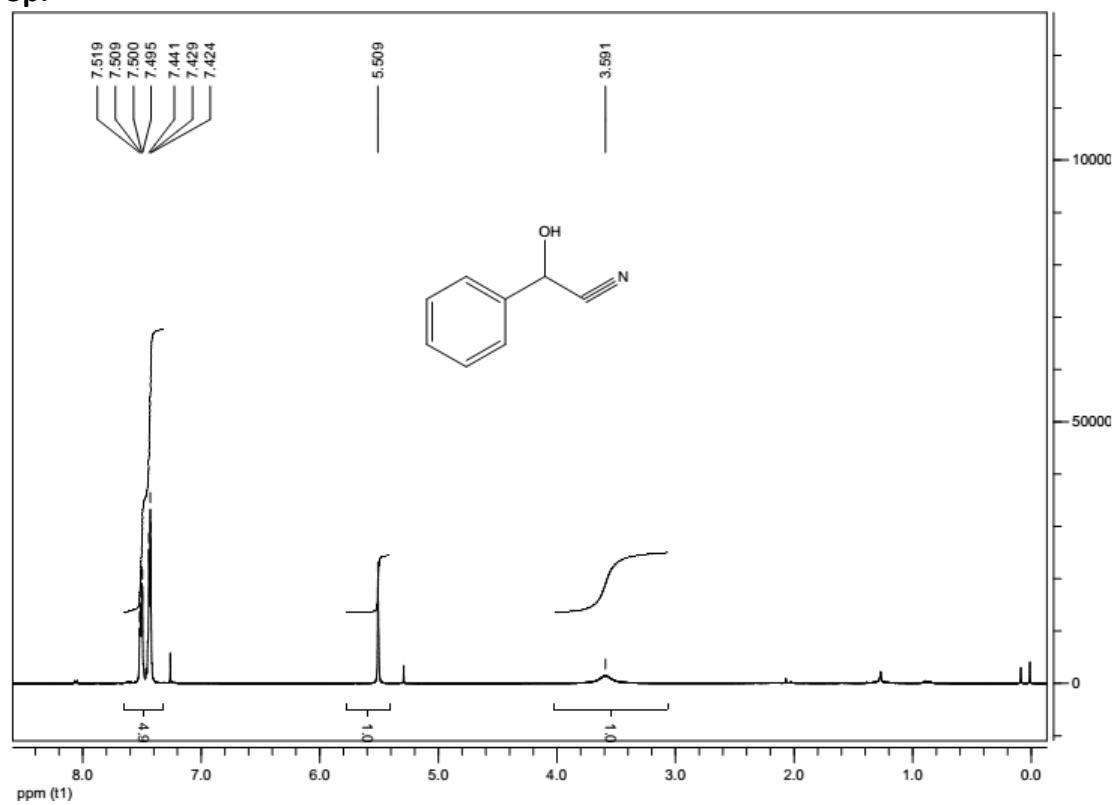

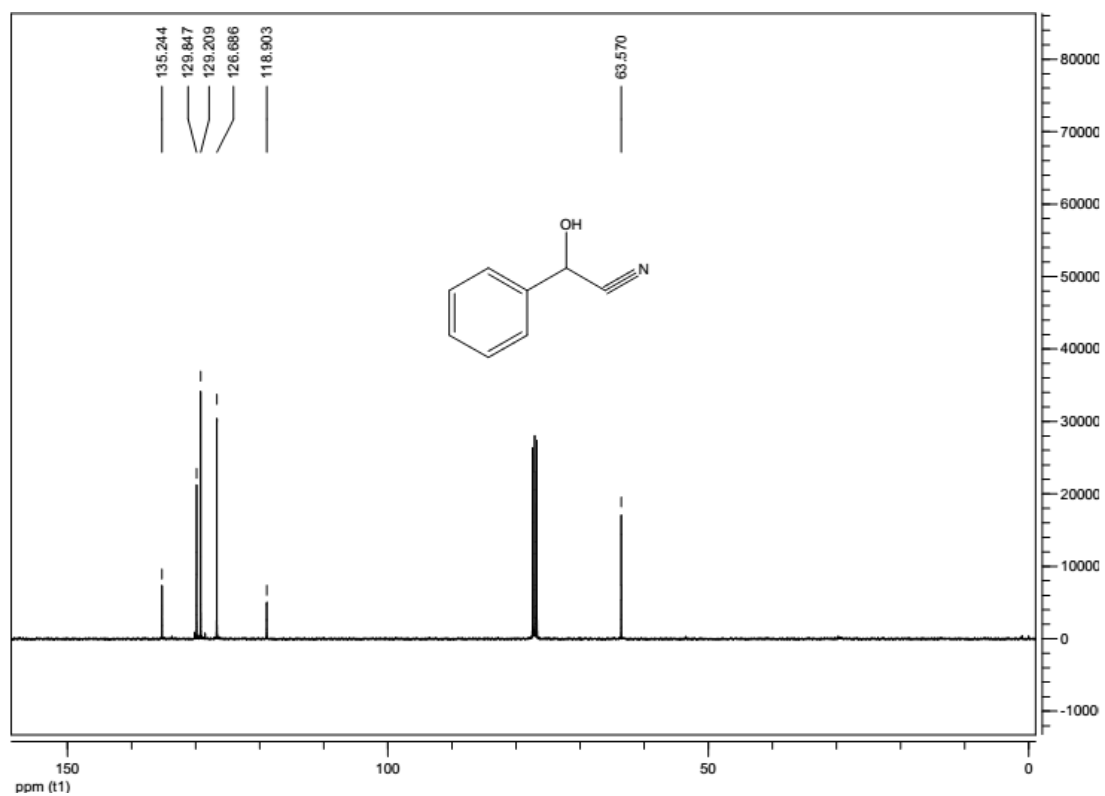

3q:

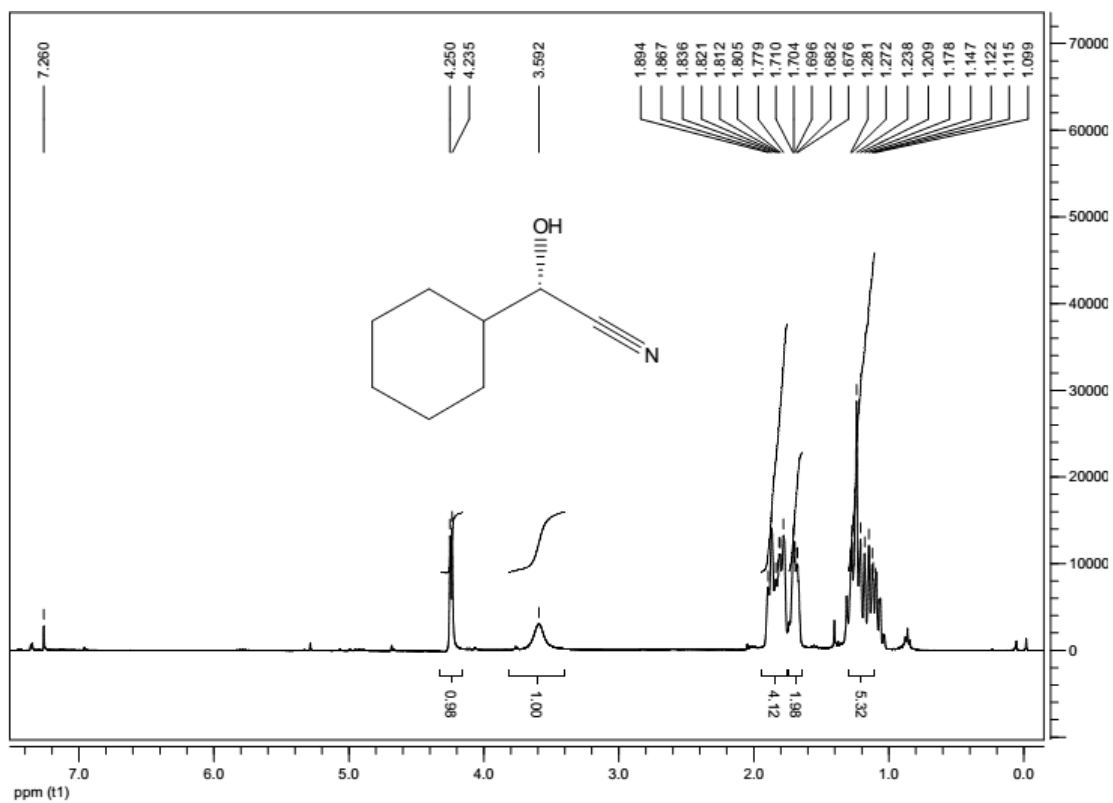

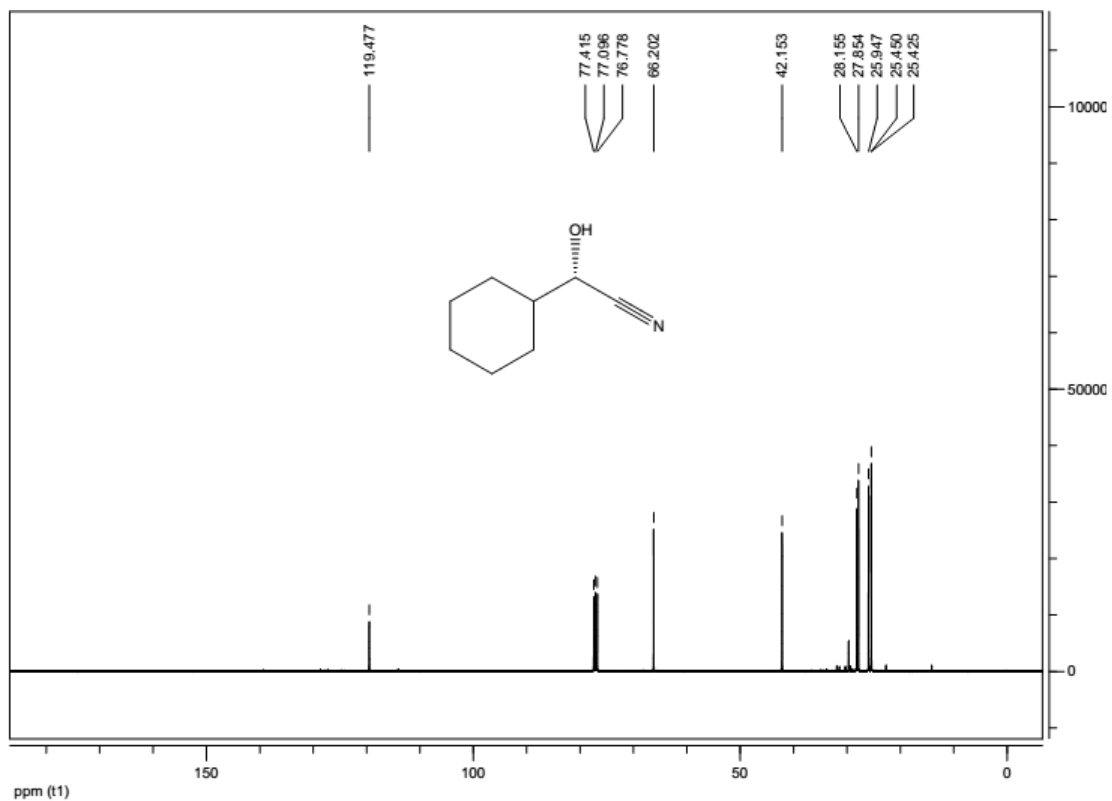

3r:

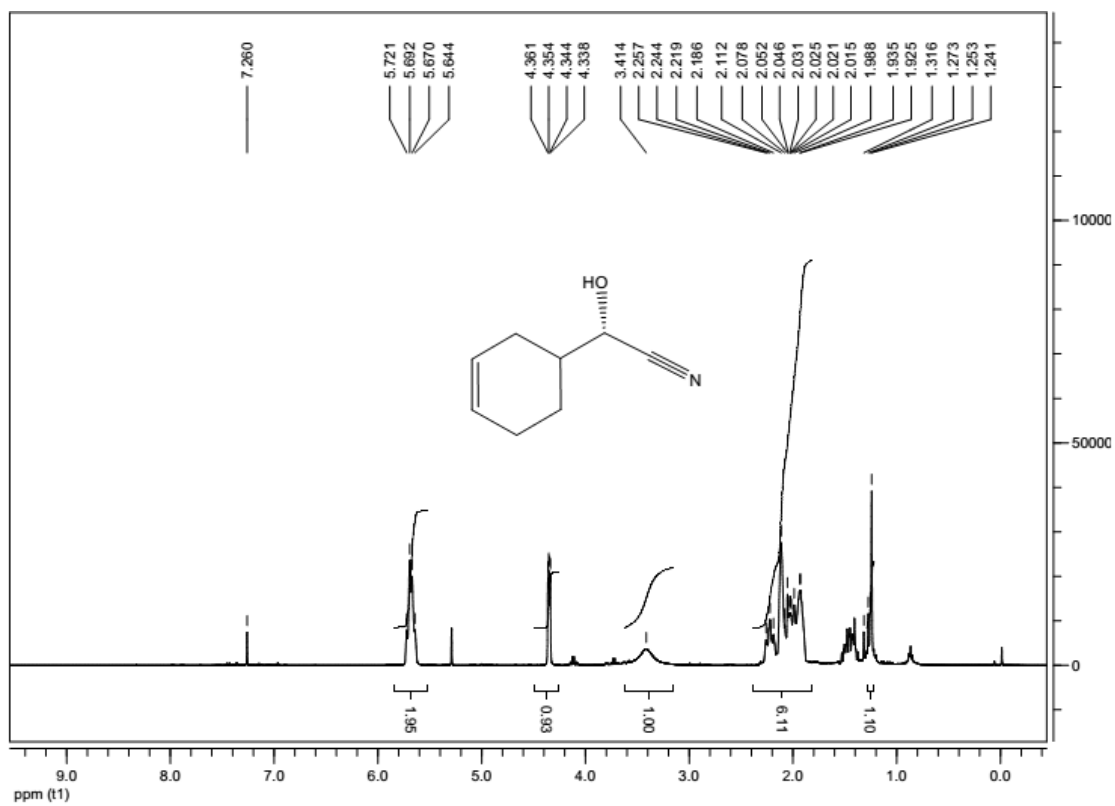

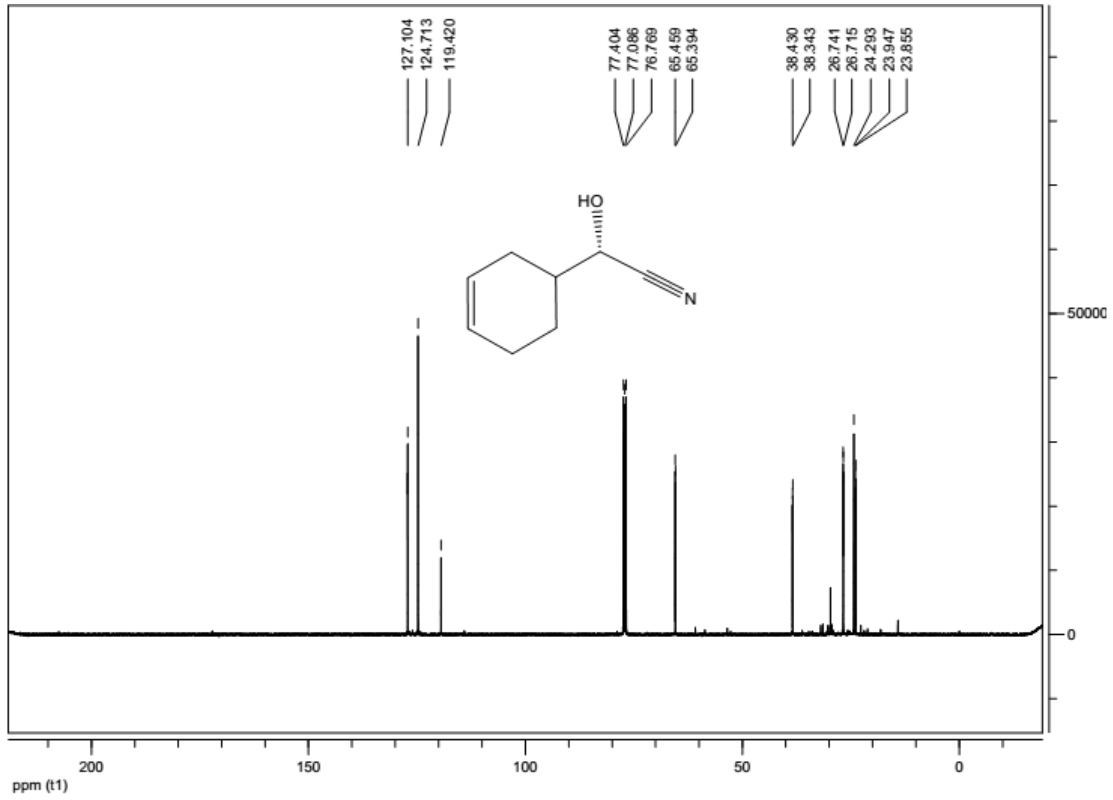

3s:

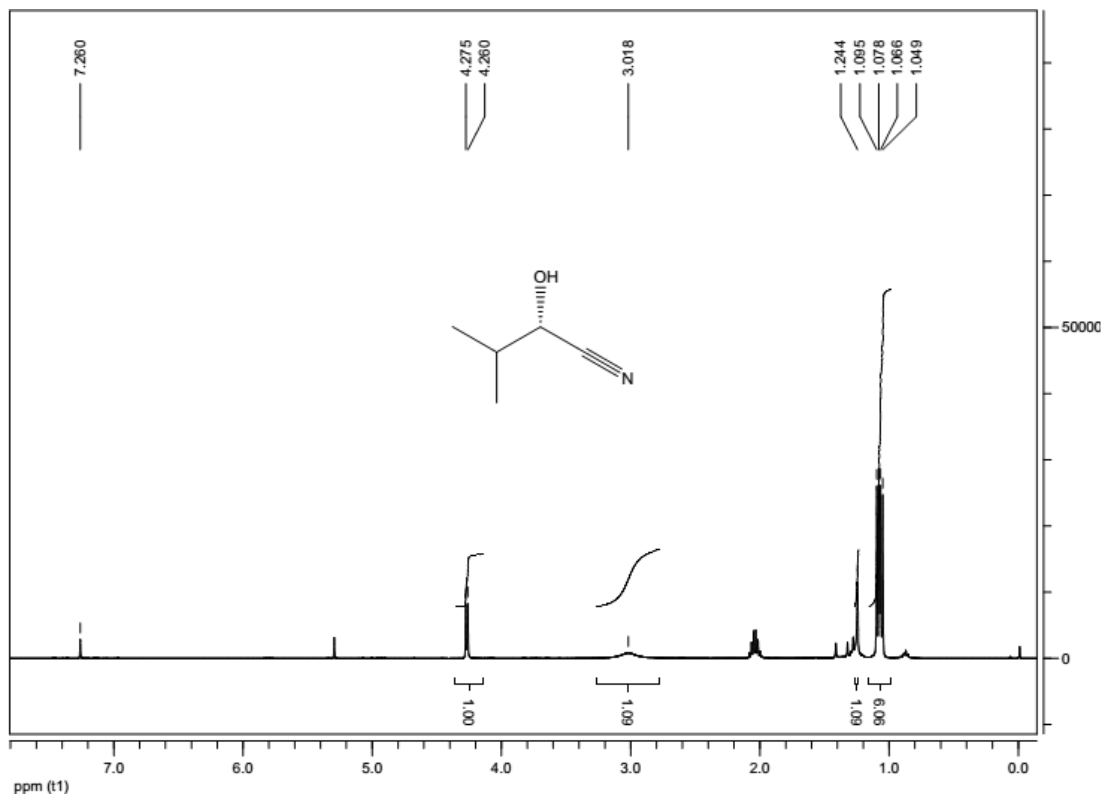

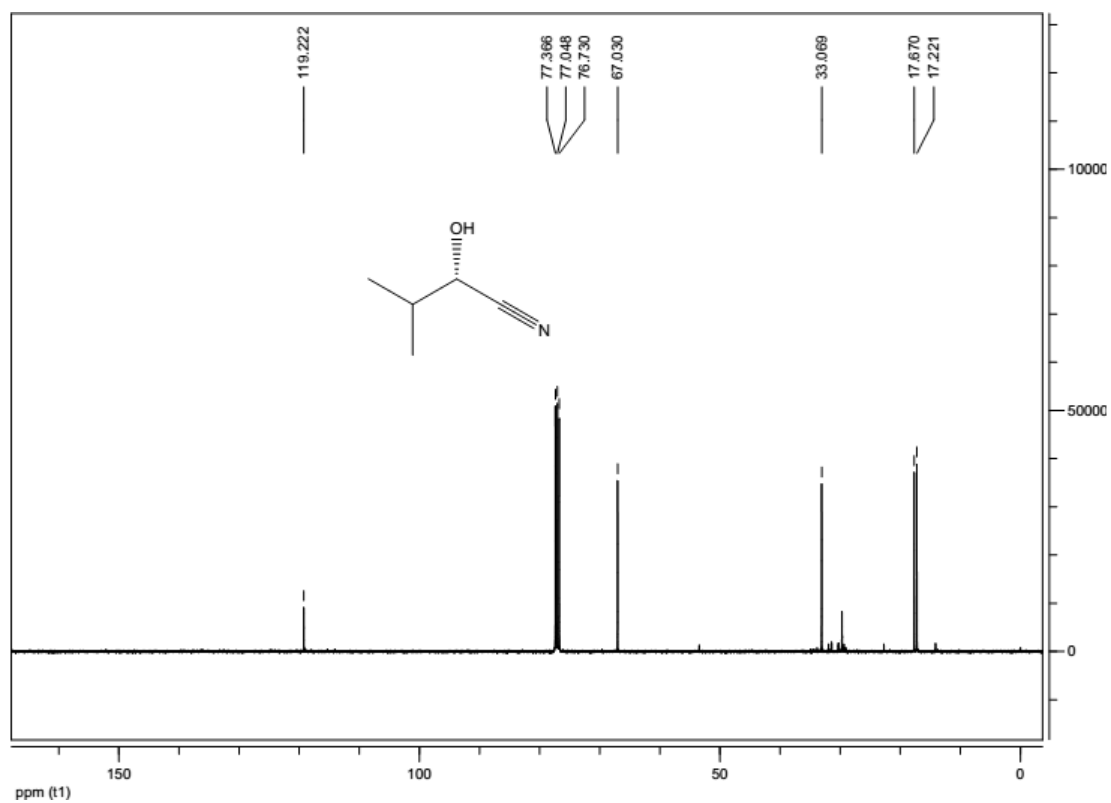

3t:

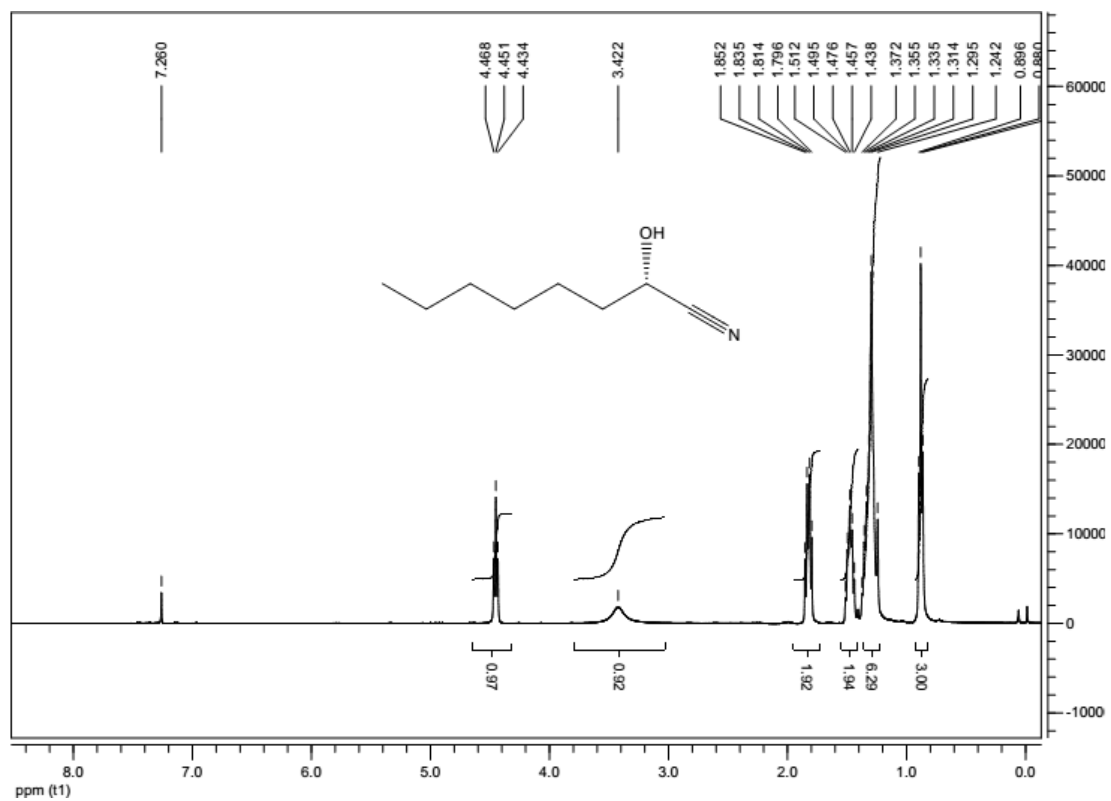



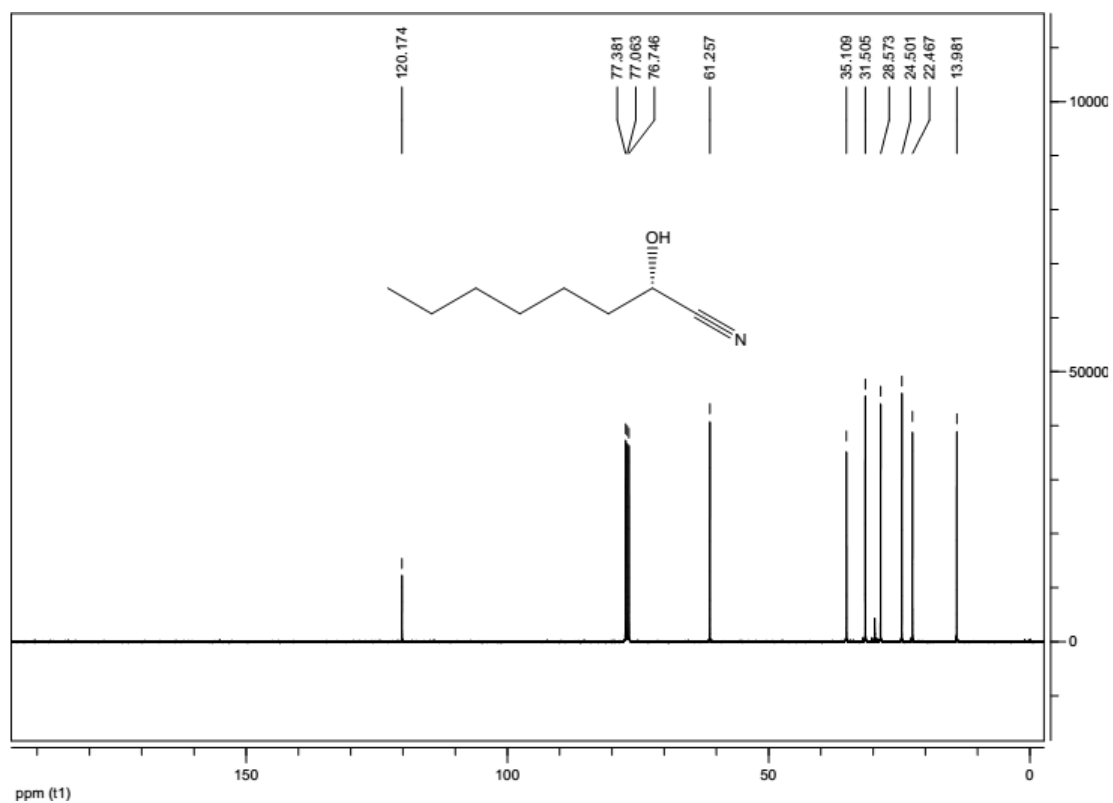

## S-6. HPLC chromatograms of Compounds 3

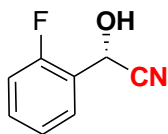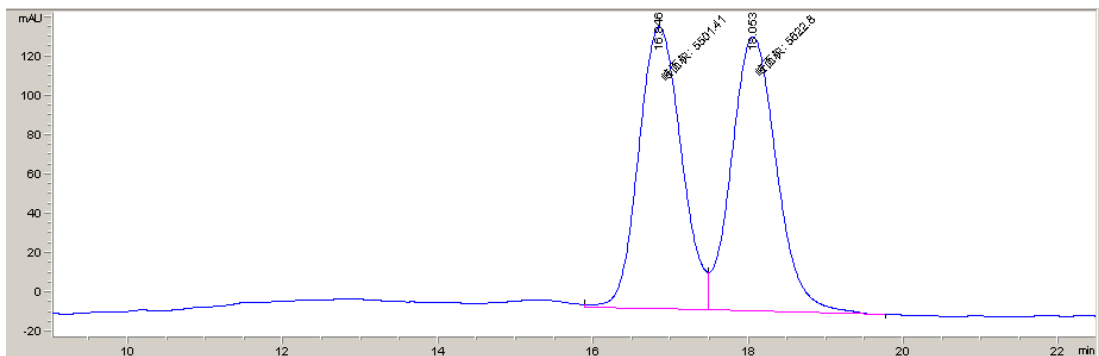

|   | Processed Chanel Descr | Time/min | Area   | %Area  | Height |
|---|------------------------|----------|--------|--------|--------|
| 1 | 210                    | 16.846   | 5501.4 | 49.454 | 143.5  |
| 2 | 210                    | 18.053   | 5622.8 | 50.546 | 139.5  |

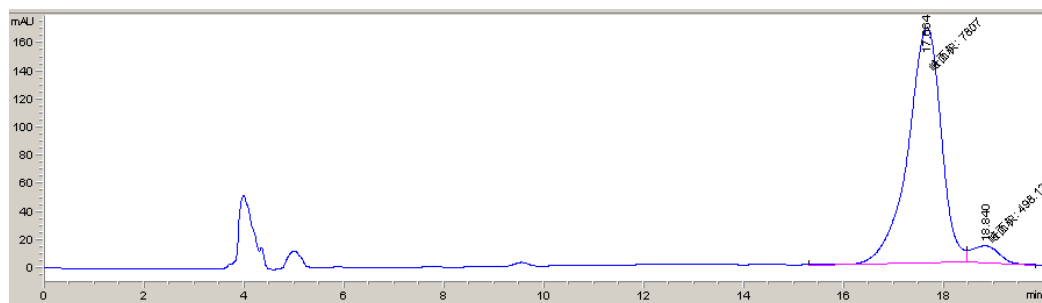

| 文件信息  |                                          | # | 时间     | 峰面积   | 峰高    | 峰宽     | 对称因子  | 峰面积 %  |
|-------|------------------------------------------|---|--------|-------|-------|--------|-------|--------|
| LC-文件 | WYL-3.D                                  | 1 | 17.664 | 7807  | 167.5 | 0.7768 | 1.351 | 94.002 |
| 文件路径  | D:\EXAMPLES\WYL\BXF 2014-02-21 20:38:58\ | 2 | 18.84  | 498.1 | 12.2  | 0.6789 | 0.783 | 5.998  |
| 日期    | 21-Feb-14, 21:05:48                      |   |        |       |       |        |       |        |
| 样品    | wyl-3                                    |   |        |       |       |        |       |        |
| 样品信息  |                                          |   |        |       |       |        |       |        |
| 条形码   |                                          |   |        |       |       |        |       |        |
| 操作者   | ZJ                                       |   |        |       |       |        |       |        |
| 方法    | BXF-SXYH.M                               |   |        |       |       |        |       |        |
| 仪器时间  | 10.000 min                               |   |        |       |       |        |       |        |

|   | Processed Chanel Descr | Time/min | Area  | %Area  | Height |
|---|------------------------|----------|-------|--------|--------|
| 1 | 210                    | 17.664   | 7807  | 94.002 | 167.5  |
| 2 | 210                    | 18.84    | 498.1 | 5.998  | 12.2   |

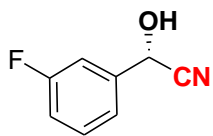

**3b**  
81% yield  
75% ee

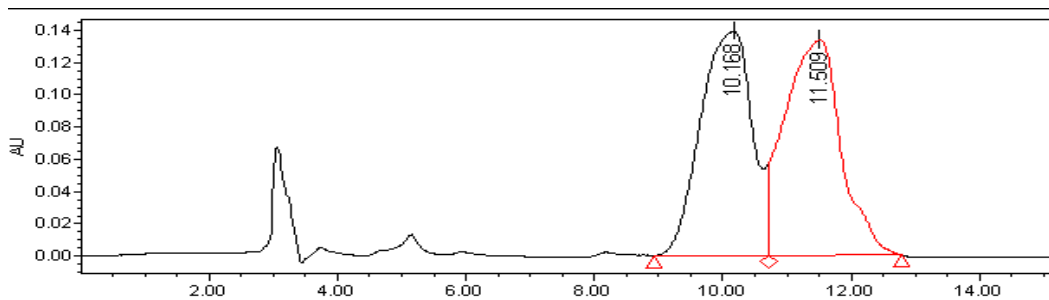

|   | Processed Chanel Descr | Time/min | Area    | %Area | Height |
|---|------------------------|----------|---------|-------|--------|
| 1 | 210                    | 10.169   | 7817667 | 49.07 | 138869 |
| 2 | 210                    | 11.509   | 8115473 | 50.93 | 133215 |

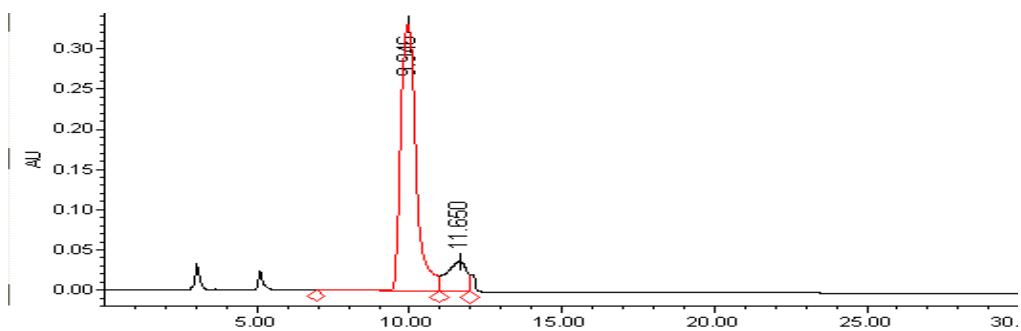

|   | Processed Chanel Descr | Time/min | Area     | %Area | Height |
|---|------------------------|----------|----------|-------|--------|
| 1 | 210                    | 9.946    | 11692001 | 86.32 | 138869 |
| 2 | 210                    | 11.650   | 1698456  | 12.68 | 133215 |

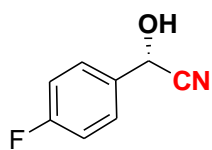

**3c**  
98% yield  
74% ee

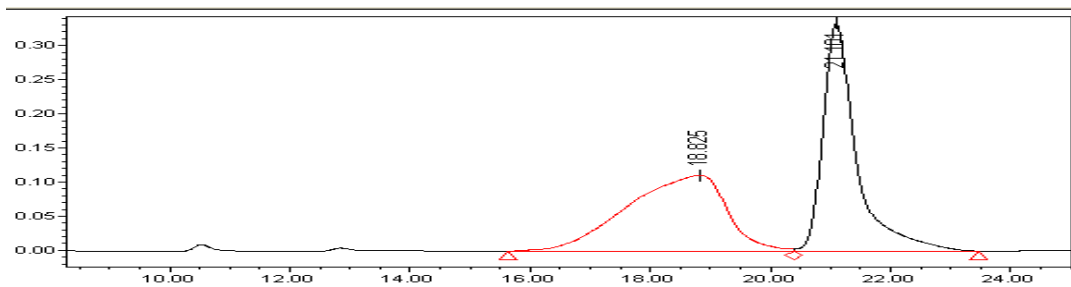

|   | Processed Chanel Descr | Time/min | Area     | %Area | Height |
|---|------------------------|----------|----------|-------|--------|
| 1 | 210                    | 18.825   | 12817440 | 49.66 | 111092 |
| 2 | 210                    | 21.101   | 12994209 | 50.34 | 333222 |

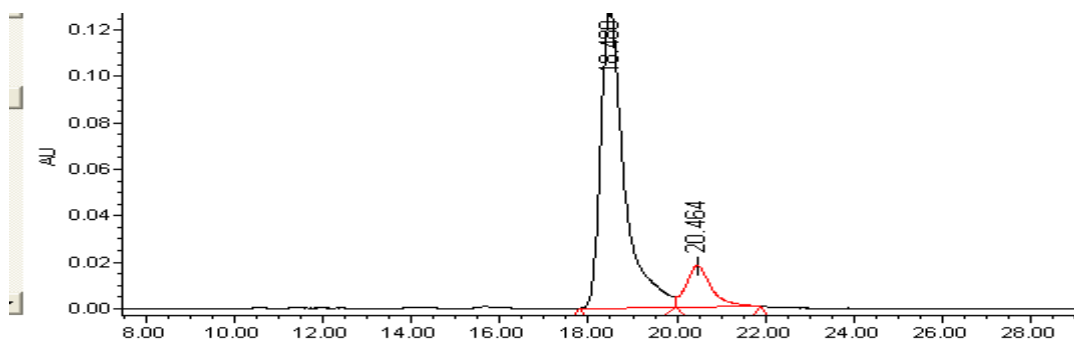

|   | Processed Chanel Descr | Time/min | Area    | %Area | Height |
|---|------------------------|----------|---------|-------|--------|
| 1 | 210                    | 18.488   | 4801350 | 87.05 | 183618 |
| 2 | 210                    | 20.464   | 714078  | 12.95 | 25252  |

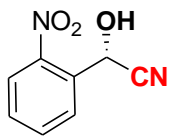

**3d**  
96% yield  
80% ee

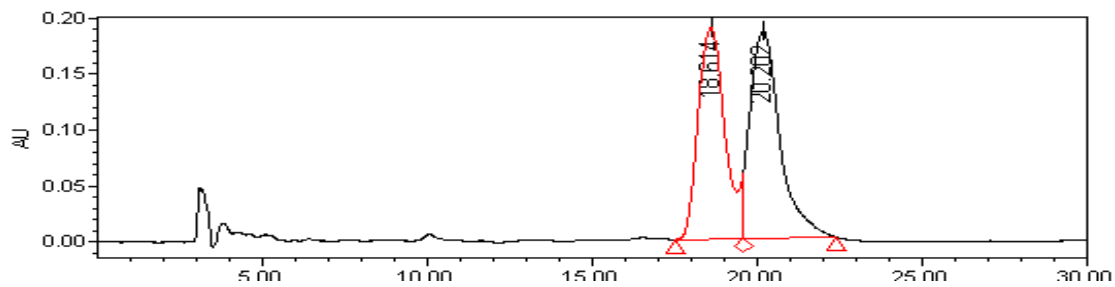

|   | Processed Chanel Descr | RT     | Area     | %Area | Height |
|---|------------------------|--------|----------|-------|--------|
| 1 | 210                    | 18.614 | 10711425 | 48.10 | 188181 |
| 2 | 210                    | 20.202 | 11559311 | 51.90 | 184655 |

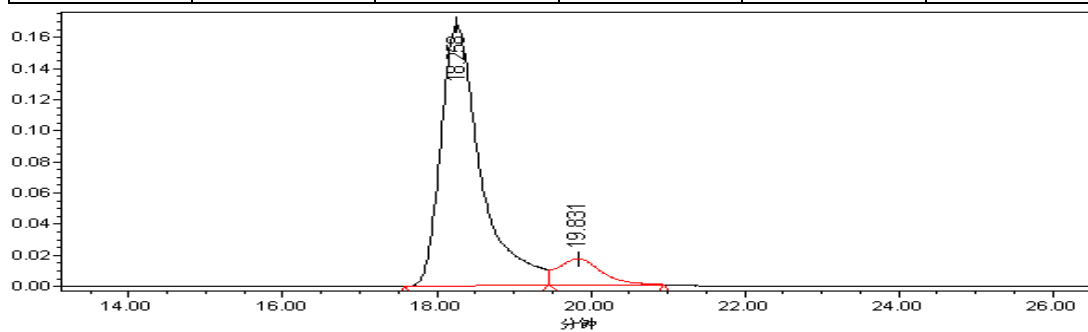

|   | Processed Chanel Descr | RT     | Area    | %Area | Height |
|---|------------------------|--------|---------|-------|--------|
| 1 | 210                    | 18.258 | 6040570 | 90.04 | 167714 |
| 2 | 210                    | 19.831 | 668192  | 9.96  | 17051  |

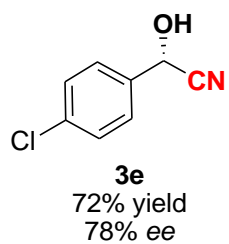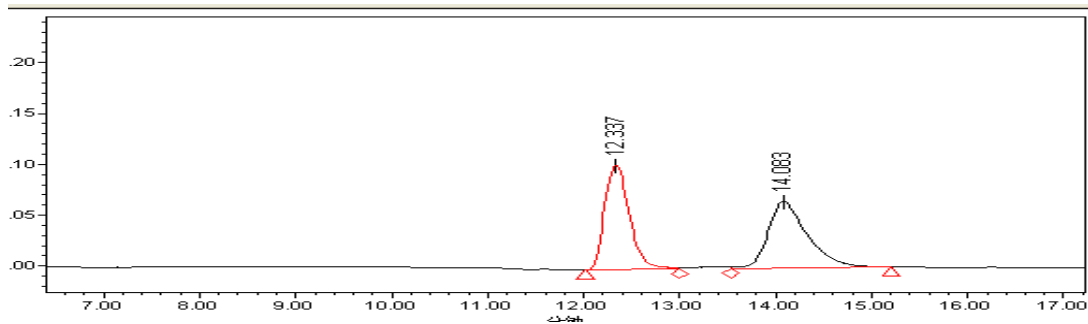

|   | Processed Chanel Descr | Time/min | Area    | %Area | Height |
|---|------------------------|----------|---------|-------|--------|
| 1 | 210                    | 12.337   | 1848249 | 49.94 | 102496 |
| 2 | 210                    | 14.083   | 1852516 | 50.06 | 65181  |

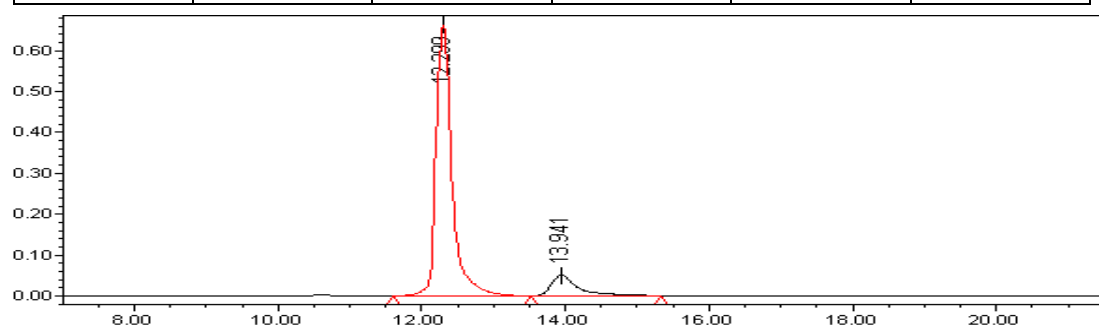

|   | Processed Chanel Descr | Time/min | Area     | %Area | Height |
|---|------------------------|----------|----------|-------|--------|
| 1 | 210                    | 12.299   | 10240711 | 88.93 | 661342 |
| 2 | 210                    | 13.941   | 1288333  | 11.07 | 49857  |

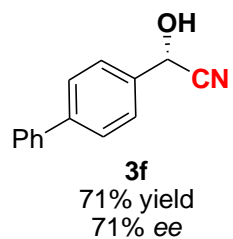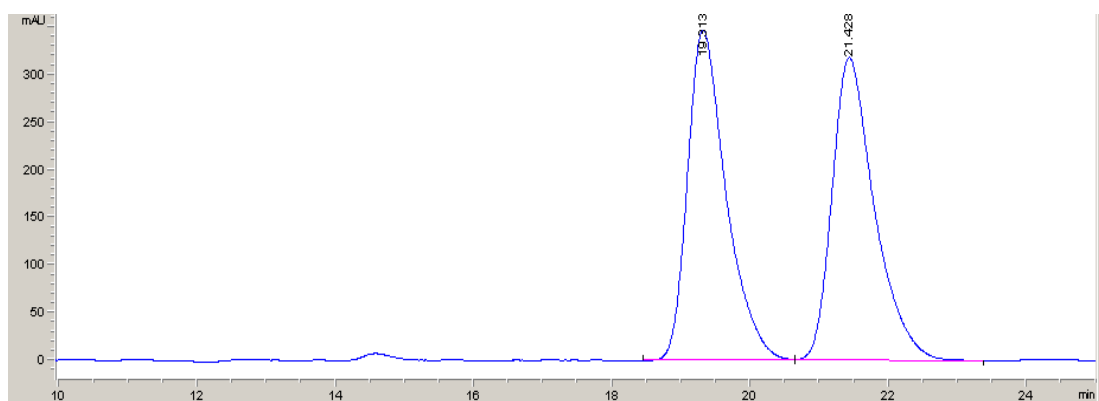

|   | Processed Chanel Descr | Time/min | Area   | %Area  | Height |
|---|------------------------|----------|--------|--------|--------|
| 1 | 210                    | 19.313   | 135101 | 49.782 | 347    |
| 2 | 210                    | 21428    | 136285 | 50.218 | 318.3  |

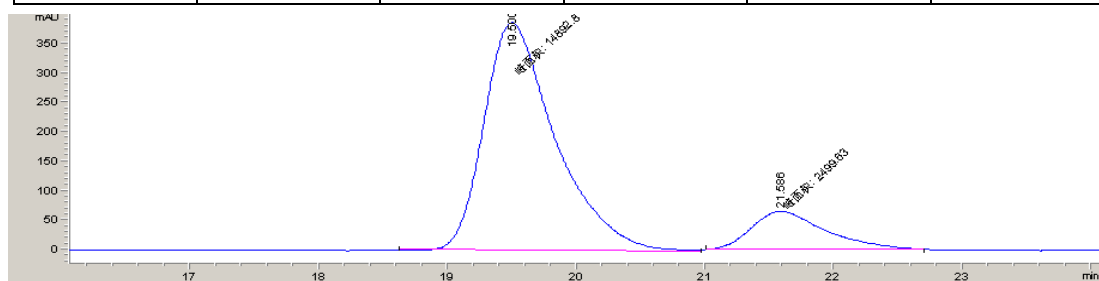

|   | Processed Chanel Descr | Time/min | Area    | %Area   | Height |
|---|------------------------|----------|---------|---------|--------|
| 1 | 210                    | 19.5     | 14892.8 | 85.6283 | 386.9  |
| 2 | 210                    | 21.586   | 2499.6  | 14.377  | 63.5   |

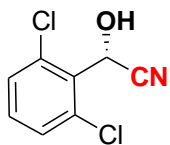

**3g**  
94% yield  
66% ee

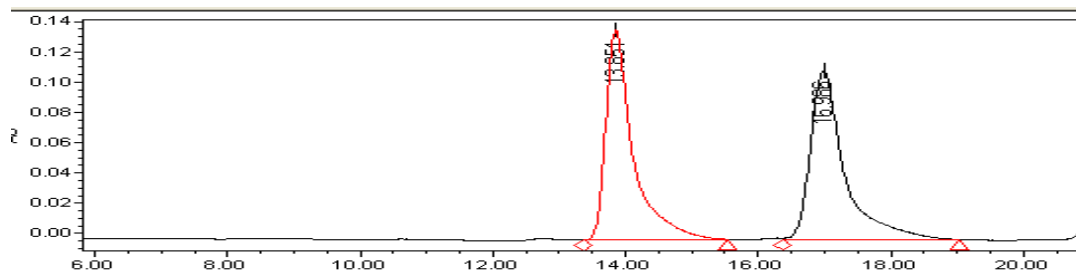

|   | Processed Chanel Descr | Time/min | Area    | %Area   | Height |
|---|------------------------|----------|---------|---------|--------|
| 1 | 210                    | 13.851   | 14892.8 | 85.6283 | 386.9  |
| 2 | 210                    | 16.986   | 2499.6  | 14.377  | 63.5   |

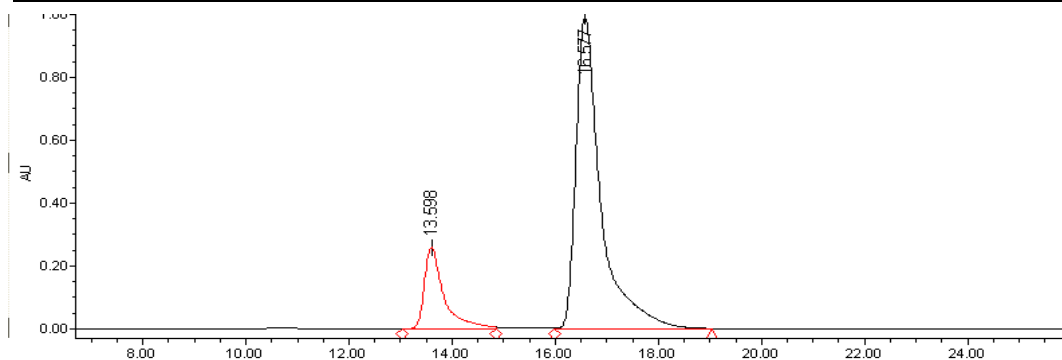

|   | Processed Chanel Descr | Time/min | Area     | %Area  | Height |
|---|------------------------|----------|----------|--------|--------|
| 1 | 210                    | 13.598   | 6782412  | 16..97 | 258624 |
| 2 | 210                    | 16.577   | 33181786 | 83.03  | 990106 |



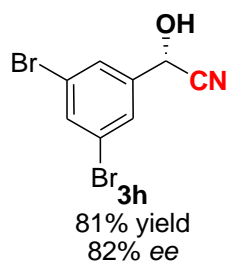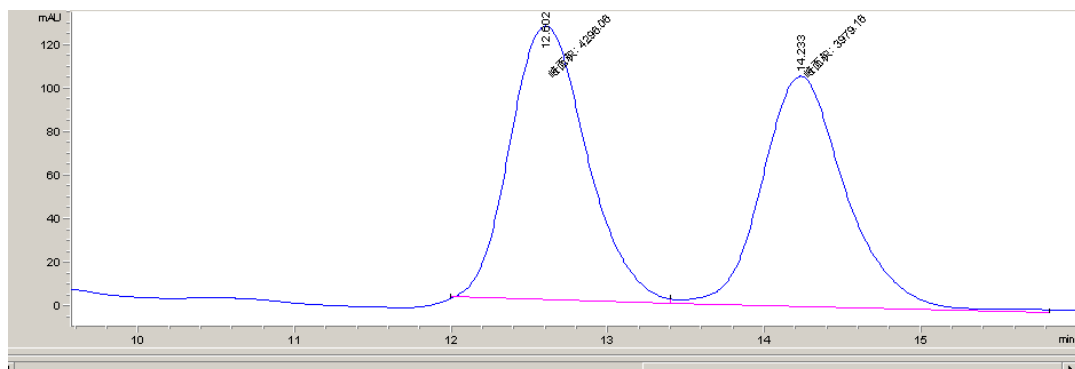

|   | Processed Chanel Descr | Time/min | Area   | %Area  | Height |
|---|------------------------|----------|--------|--------|--------|
| 1 | 210                    | 12.602   | 4296.1 | 51.915 | 125.9  |
| 2 | 210                    | 14.233   | 3979.2 | 48.085 | 105.9  |

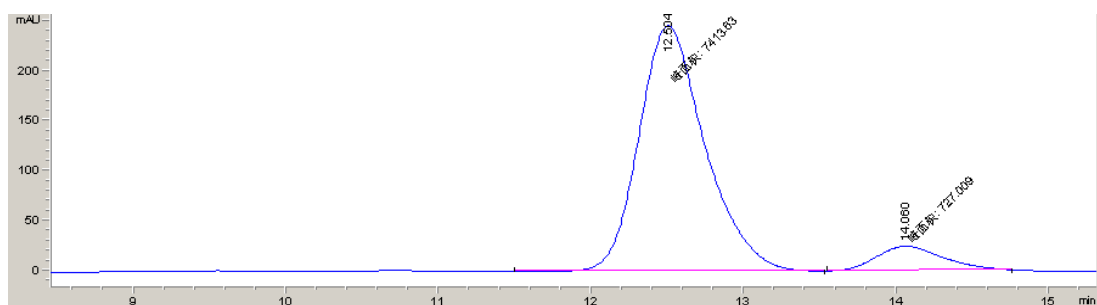

|   | Processed Chanel Descr | Time/min | Area      | %Area  | Height |
|---|------------------------|----------|-----------|--------|--------|
| 1 | 210                    | 12.504   | 7413.6    | 91.069 | 145.8  |
| 2 | 210                    | 14.06    | 2499.6727 | 8.931  | 24.2   |

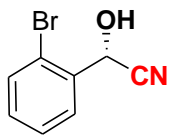

**3i**  
81% yield  
67% ee

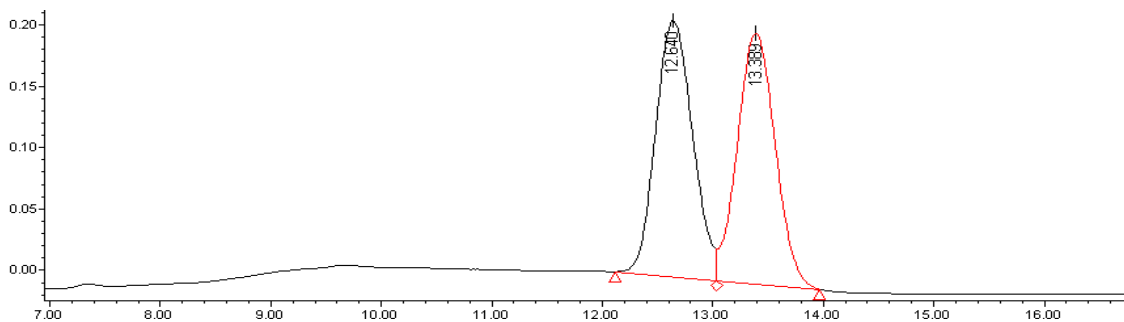

|   | Processed Chanel Descr | Time/min | Area    | %Area | Height |
|---|------------------------|----------|---------|-------|--------|
| 1 | 210                    | 12.640   | 4860600 | 50.06 | 208562 |
| 2 | 210                    | 13.389   | 4849388 | 49.94 | 204079 |

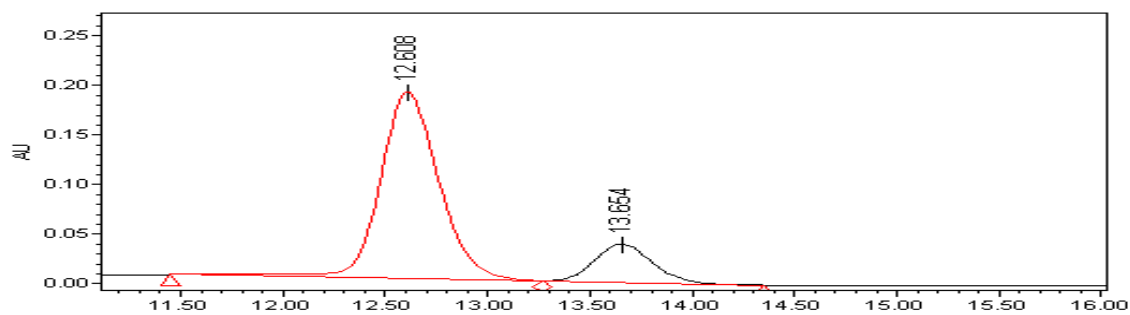

|   | Processed Chanel Descr | Time/min | Area    | %Area | Height |
|---|------------------------|----------|---------|-------|--------|
| 1 | 210                    | 12.608   | 3756088 | 83.46 | 188310 |
| 2 | 210                    | 13.654   | 759342  | 16.54 | 18697  |

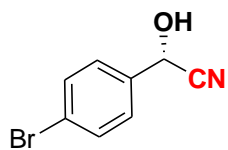

**3j**  
72% yield  
78% ee

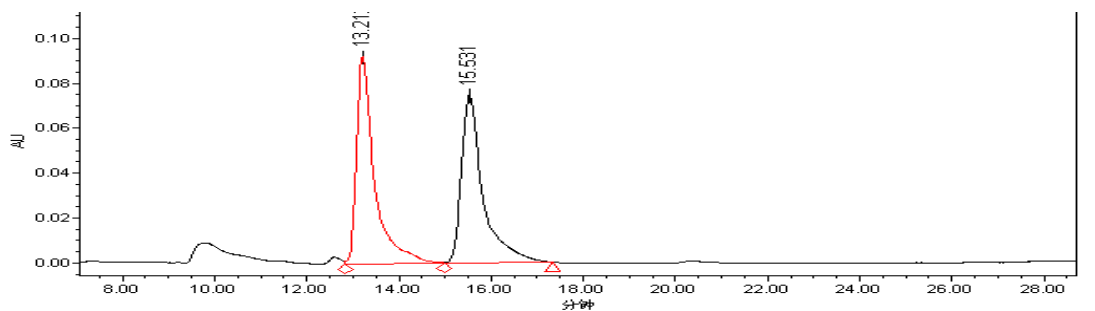

|   | Processed Chanel Descr | Time/min | Area    | %Area | Height |
|---|------------------------|----------|---------|-------|--------|
| 1 | 210                    | 13.212   | 2496844 | 50.73 | 92279  |
| 2 | 210                    | 15.531   | 2424717 | 49.27 | 74772  |

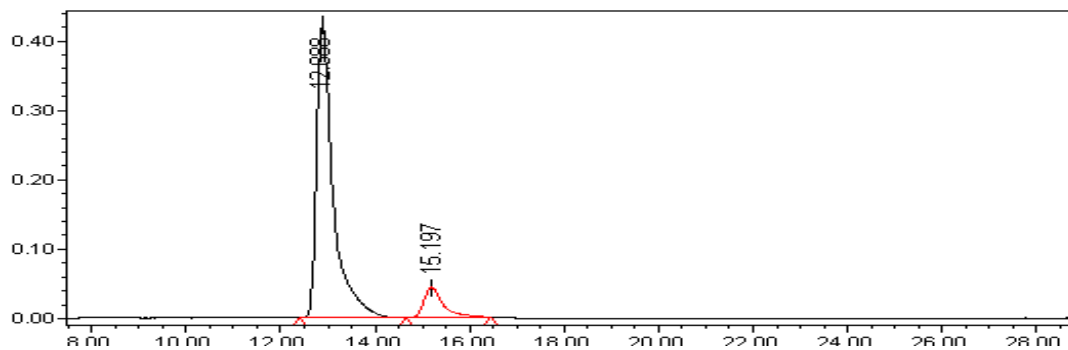

|   | Processed Chanel Descr | RT     | Area     | %Area | Height |
|---|------------------------|--------|----------|-------|--------|
| 1 | 210                    | 12.888 | 10287943 | 89.11 | 188310 |
| 2 | 210                    | 15.197 | 1257478  | 10.89 | 18697  |

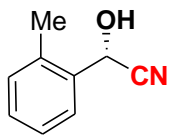

**3k**  
71% yield  
71% ee

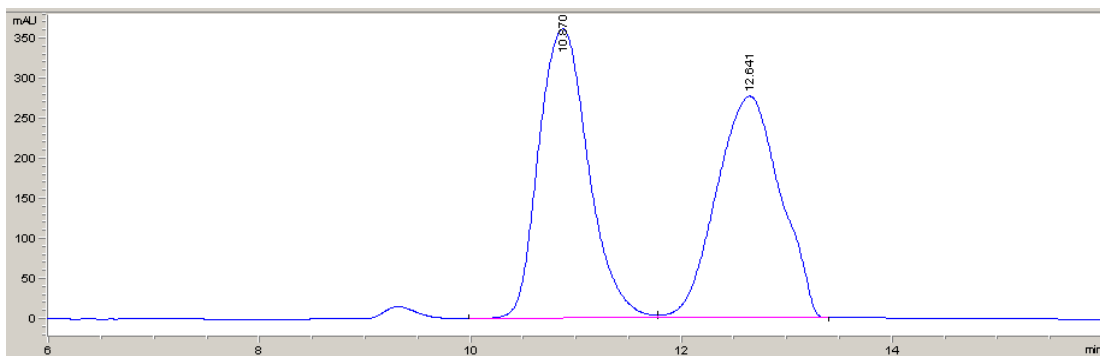

|   | Processed Chanel Descr | Time/min | Area    | %Area  | Height |
|---|------------------------|----------|---------|--------|--------|
| 1 | 210                    | 10.87    | 11849.3 | 50.352 | 361.3  |
| 2 | 210                    | 12.641   | 11683.4 | 49.648 | 276.8  |

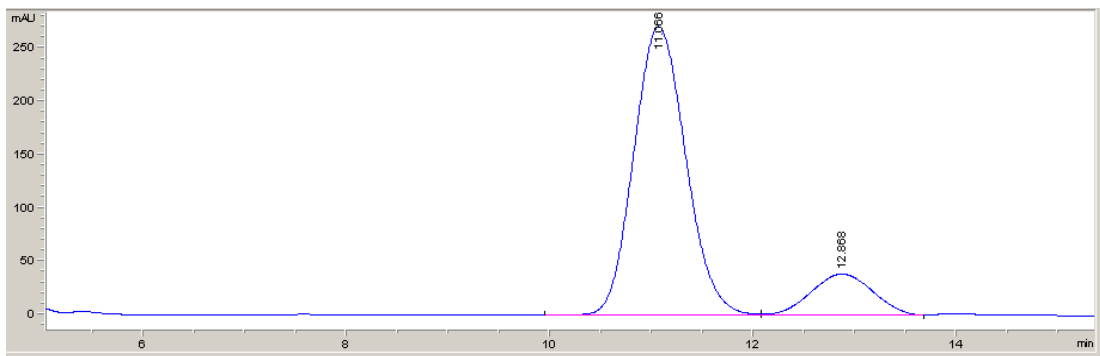

|   | Processed Chanel Descr | Time/min | Area   | %Area  | Height |
|---|------------------------|----------|--------|--------|--------|
| 1 | 210                    | 11.066   | 9639.2 | 85.536 | 271.2  |
| 2 | 210                    | 12.868   | 1629.9 | 14.464 | 38.7   |

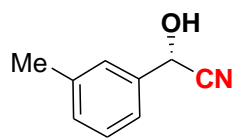

**3I**  
71% yield  
78% ee

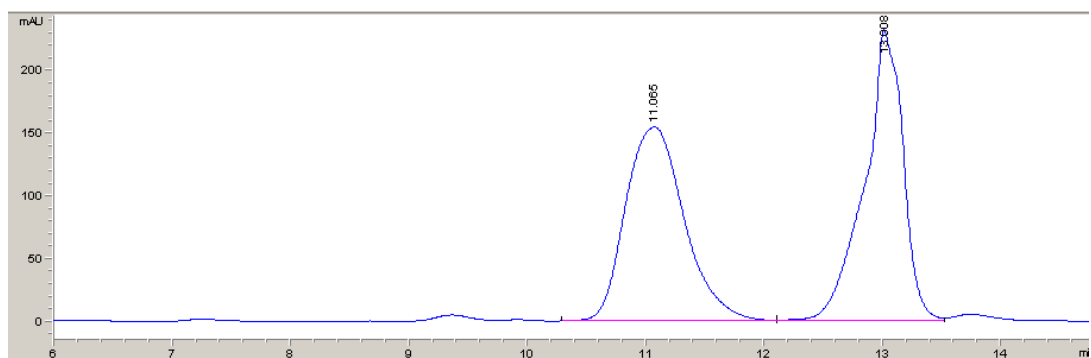

|   | Processed Chanel Descr | Time/min | Area   | %Area  | Height |
|---|------------------------|----------|--------|--------|--------|
| 1 | 210                    | 11.065   | 5347.3 | 50.431 | 154.5  |
| 2 | 210                    | 13.008   | 5255.9 | 49.569 | 231.9  |

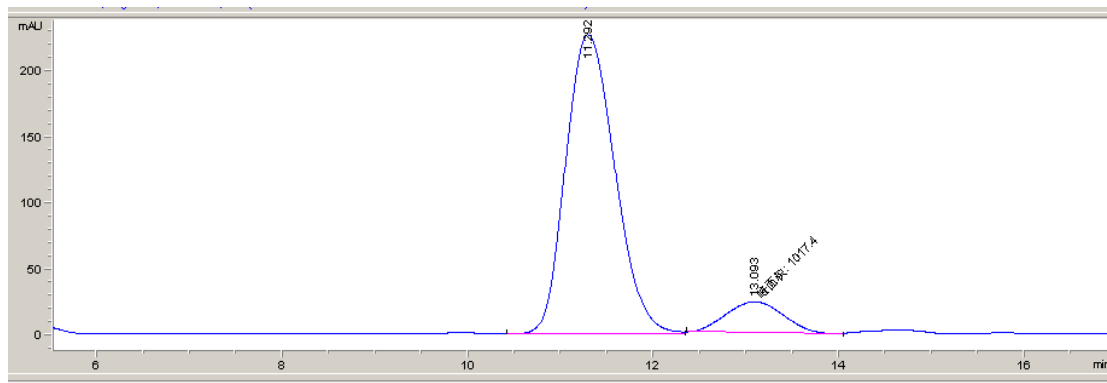

|   | Processed Chanel Descr | Time/min | Area   | %Area  | Height |
|---|------------------------|----------|--------|--------|--------|
| 1 | 210                    | 11.292   | 8357.2 | 89.147 | 22.5   |
| 2 | 210                    | 13.093   | 1017.4 | 10.853 | 23.7   |

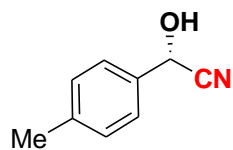

**3m**  
72% yield  
75% ee

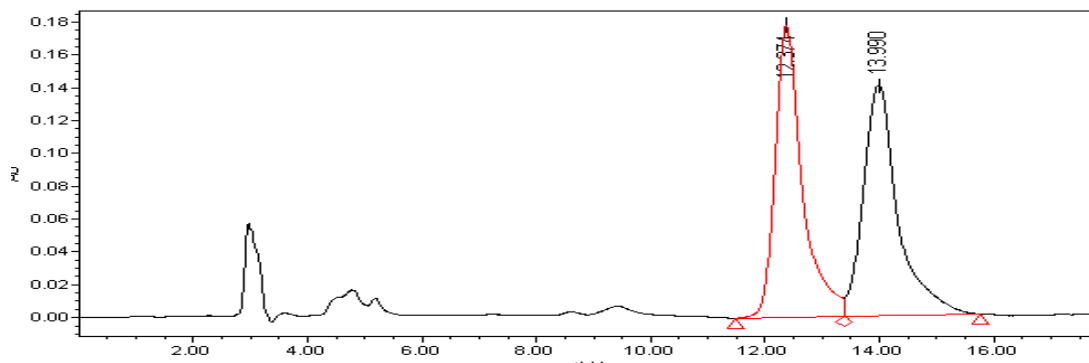

|   | Processed Chanel Descr | Time/min | Area     | %Area | Height |
|---|------------------------|----------|----------|-------|--------|
| 1 | 210                    | 12.374   | 5891259  | 49.89 | 177881 |
| 2 | 210                    | 13.990   | 59.16406 | 50.11 | 140500 |

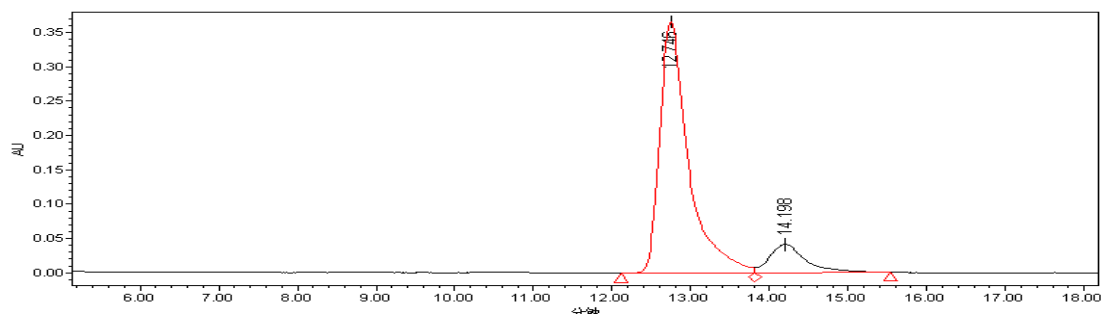

|   | Processed Chanel Descr | Time/min | Area    | %Area | Height |
|---|------------------------|----------|---------|-------|--------|
| 1 | 210                    | 12.746   | 9333394 | 87.56 | 365714 |
| 2 | 210                    | 14.196   | 1326161 | 12.44 | 41386  |

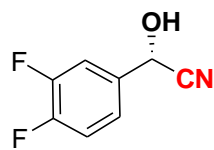

**3n**  
84% yield  
90% ee

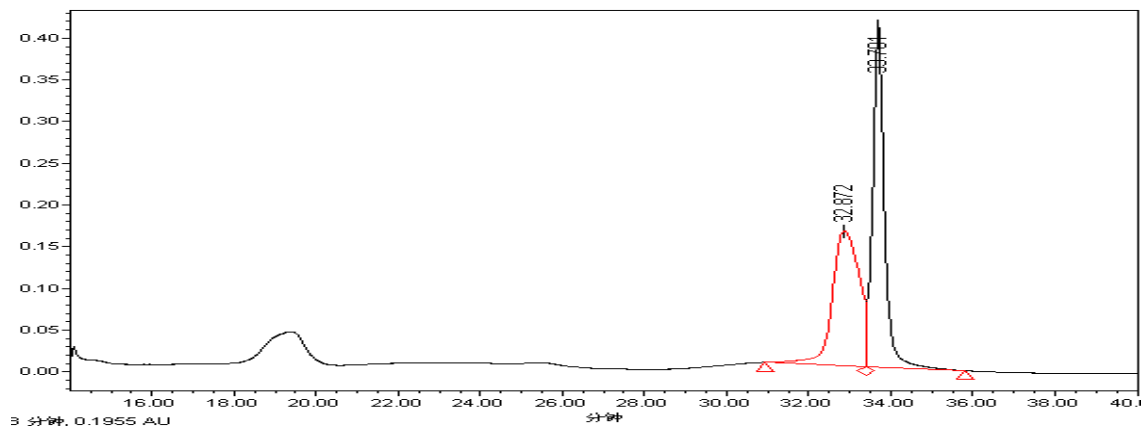

|   | Processed Chanel Descr | Time/min | Area    | %Area | Height |
|---|------------------------|----------|---------|-------|--------|
| 1 | 210                    | 32.872   | 7338301 | 47.19 | 161882 |
| 2 | 210                    | 33.701   | 8212877 | 52.81 | 400403 |

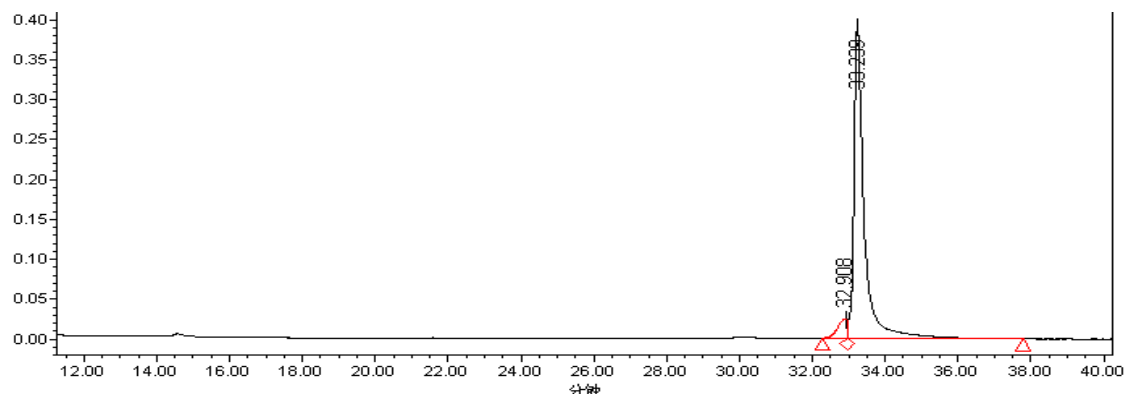

|   | Processed Chanel Descr | Time/min | Area    | %Area | Height |
|---|------------------------|----------|---------|-------|--------|
| 1 | 210                    | 32.908   | 410138  | 5.10  | 23967  |
| 2 | 210                    | 33.239   | 7627099 | 94.90 | 390290 |

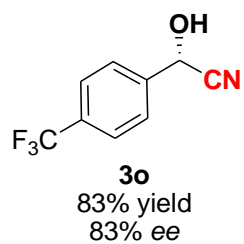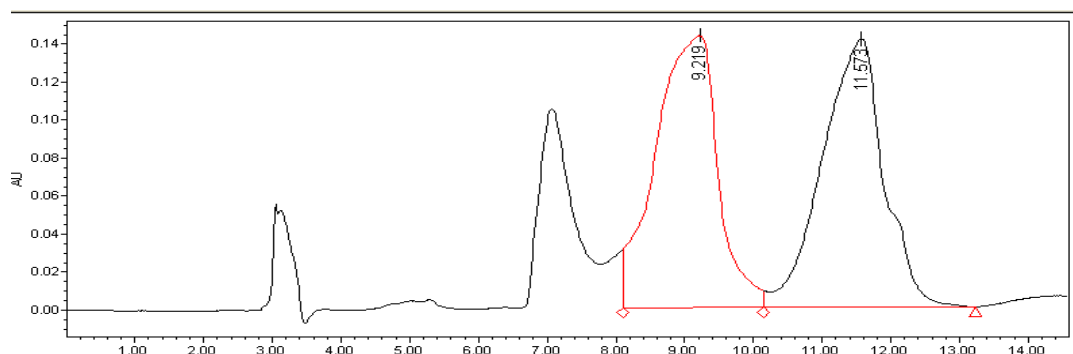

|   | Processed Chanel Descr | Time/min | Area    | %Area | Height |
|---|------------------------|----------|---------|-------|--------|
| 1 | 210                    | 9.219    | 9025977 | 50.65 | 143163 |
| 2 | 210                    | 11.573   | 8792871 | 49.35 | 141162 |

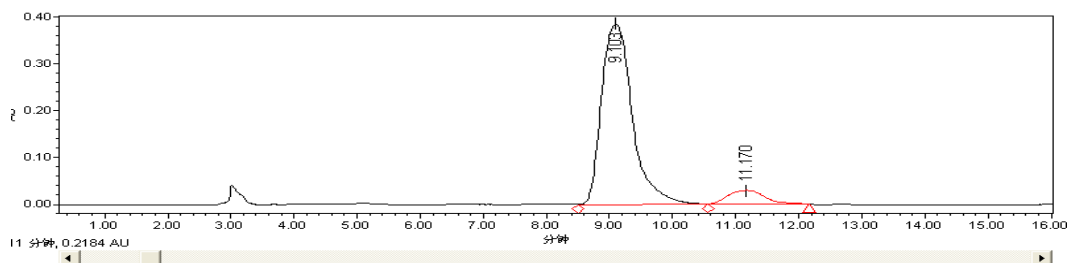

|   | Processed Chanel Descr | Time/min | Area     | %Area | Height |
|---|------------------------|----------|----------|-------|--------|
| 1 | 210                    | 9.103    | 12501667 | 91.44 | 384811 |
| 2 | 210                    | 11.170   | 1226349  | 8.56  | 29639  |



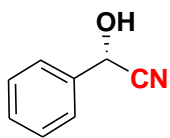

**3p**  
65% yield  
71% ee

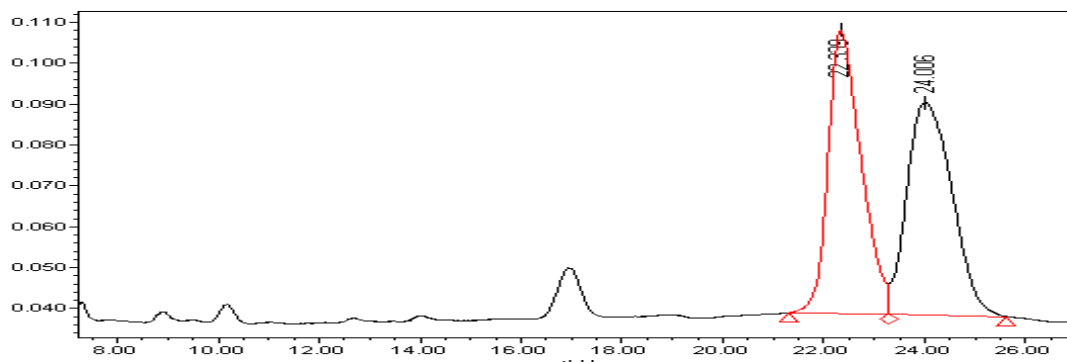

|   | Processed Chanel Descr | Time/min | Area    | %Area | Height |
|---|------------------------|----------|---------|-------|--------|
| 1 | 210                    | 22.339   | 3160665 | 49.3  | 59240  |
| 2 | 210                    | 24.006   | 3250749 | 50.70 | 52047  |

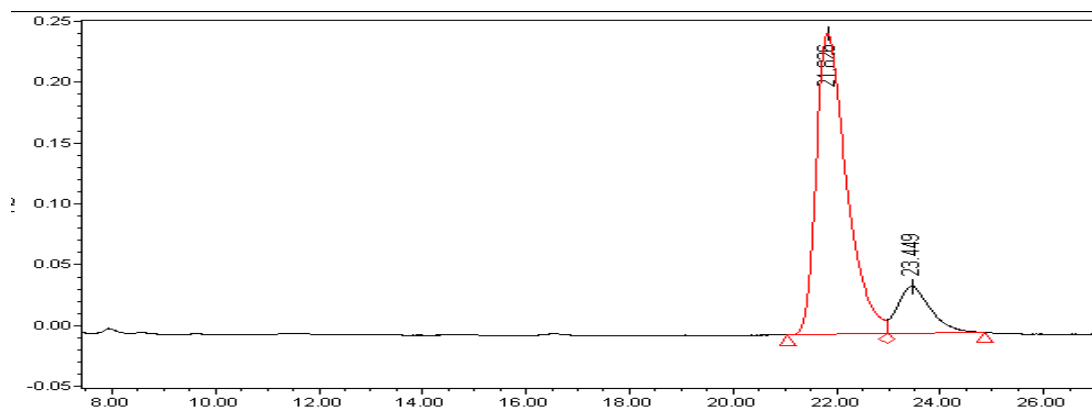

|   | Processed Chanel Descr | Time/min | Area     | %Area | Height |
|---|------------------------|----------|----------|-------|--------|
| 1 | 210                    | 21.826   | 10000777 | 85.41 | 247014 |
| 2 | 210                    | 23.449   | 1721857  | 14.59 | 38682  |
